# Supplementary material for: Is Adult Second Language Acquisition Defective?
Source: Front Psychol. 2020 Jul 30;11:1839. doi: 10.3389/fpsyg.2020.01839 (PMC7409517; doi:10.3389/fpsyg.2020.01839)
Supplement: Supplementary file 1 [file Data_Sheet_1.ZIP]

Archive with 10 entries (10 files):
- Appendix G.DOCX
- code.R
- List of supplemantary materials.docx
- Appendix B.docx
- df-summary.csv
- Appendix C.docx
- Appendix A.docx
- df-long.csv
- Appendix I.docx
- df-long.RDS
