# Supplementary material for: Is Adult Second Language Acquisition Defective?
Source: Front Psychol. 2020 Jul 30;11:1839. doi: 10.3389/fpsyg.2020.01839 (PMC7409517; doi:10.3389/fpsyg.2020.01839)
Supplement: Supplementary file 1 [file Data_Sheet_1.ZIP › df-long.csv]

participant	response	task	item	group	taskident	gramm
00265018-0164-4417-8664-6eedd7839004.txt	1	sGJT	37	immersion	1	G
00265018-0164-4417-8664-6eedd7839004.txt	1	sGJT	36	immersion	1	U
00265018-0164-4417-8664-6eedd7839004.txt	1	sGJT	32	immersion	1	G
00265018-0164-4417-8664-6eedd7839004.txt	1	sGJT	8	immersion	1	G
00265018-0164-4417-8664-6eedd7839004.txt	1	sGJT	15	immersion	1	G
00265018-0164-4417-8664-6eedd7839004.txt	1	sGJT	33	immersion	1	G
00265018-0164-4417-8664-6eedd7839004.txt	1	sGJT	31	immersion	1	G
00265018-0164-4417-8664-6eedd7839004.txt	1	sGJT	21	immersion	1	G
00265018-0164-4417-8664-6eedd7839004.txt	1	sGJT	5	immersion	1	G
00265018-0164-4417-8664-6eedd7839004.txt	1	sGJT	7	immersion	1	U
00265018-0164-4417-8664-6eedd7839004.txt	1	sGJT	37	immersion	1	U
00265018-0164-4417-8664-6eedd7839004.txt	1	sGJT	40	immersion	1	U
00265018-0164-4417-8664-6eedd7839004.txt	1	sGJT	27	immersion	1	U
00265018-0164-4417-8664-6eedd7839004.txt	1	sGJT	1	immersion	1	U
00265018-0164-4417-8664-6eedd7839004.txt	1	sGJT	17	immersion	1	U
00265018-0164-4417-8664-6eedd7839004.txt	1	sGJT	31	immersion	1	U
00265018-0164-4417-8664-6eedd7839004.txt	1	sGJT	25	immersion	1	G
00265018-0164-4417-8664-6eedd7839004.txt	1	sGJT	24	immersion	1	G
00265018-0164-4417-8664-6eedd7839004.txt	1	sGJT	11	immersion	1	U
00265018-0164-4417-8664-6eedd7839004.txt	1	sGJT	20	immersion	1	G
00265018-0164-4417-8664-6eedd7839004.txt	1	sGJT	28	immersion	1	U
00265018-0164-4417-8664-6eedd7839004.txt	1	sGJT	14	immersion	1	U
00265018-0164-4417-8664-6eedd7839004.txt	1	sGJT	28	immersion	1	G
00265018-0164-4417-8664-6eedd7839004.txt	1	sGJT	2	immersion	1	U
00265018-0164-4417-8664-6eedd7839004.txt	1	sGJT	38	immersion	1	U
00265018-0164-4417-8664-6eedd7839004.txt	1	sGJT	10	immersion	1	U
00265018-0164-4417-8664-6eedd7839004.txt	1	sGJT	4	immersion	1	G
00265018-0164-4417-8664-6eedd7839004.txt	1	sGJT	39	immersion	1	G
00265018-0164-4417-8664-6eedd7839004.txt	1	sGJT	34	immersion	1	U
00265018-0164-4417-8664-6eedd7839004.txt	1	sGJT	29	immersion	1	G
00265018-0164-4417-8664-6eedd7839004.txt	1	sGJT	20	immersion	1	U
00265018-0164-4417-8664-6eedd7839004.txt	1	sGJT	35	immersion	1	G
00265018-0164-4417-8664-6eedd7839004.txt	1	sGJT	6	immersion	1	G
00265018-0164-4417-8664-6eedd7839004.txt	1	sGJT	27	immersion	1	G
00265018-0164-4417-8664-6eedd7839004.txt	1	sGJT	12	immersion	1	U
00265018-0164-4417-8664-6eedd7839004.txt	1	sGJT	38	immersion	1	G
00265018-0164-4417-8664-6eedd7839004.txt	0	sGJT	22	immersion	1	G
00265018-0164-4417-8664-6eedd7839004.txt	1	sGJT	35	immersion	1	U
00265018-0164-4417-8664-6eedd7839004.txt	1	sGJT	24	immersion	1	U
00265018-0164-4417-8664-6eedd7839004.txt	0	sGJT	12	immersion	1	G
00265018-0164-4417-8664-6eedd7839004.txt	0	sGJT	21	immersion	1	U
00265018-0164-4417-8664-6eedd7839004.txt	1	sGJT	22	immersion	1	U
00265018-0164-4417-8664-6eedd7839004.txt	1	sGJT	1	immersion	1	G
00265018-0164-4417-8664-6eedd7839004.txt	1	sGJT	14	immersion	1	G
00265018-0164-4417-8664-6eedd7839004.txt	1	sGJT	3	immersion	1	U
00265018-0164-4417-8664-6eedd7839004.txt	1	sGJT	9	immersion	1	G
00265018-0164-4417-8664-6eedd7839004.txt	1	sGJT	10	immersion	1	G
00265018-0164-4417-8664-6eedd7839004.txt	1	sGJT	8	immersion	1	U
00265018-0164-4417-8664-6eedd7839004.txt	1	sGJT	16	immersion	1	U
00265018-0164-4417-8664-6eedd7839004.txt	1	sGJT	11	immersion	1	G
00265018-0164-4417-8664-6eedd7839004.txt	1	sGJT	3	immersion	1	G
00265018-0164-4417-8664-6eedd7839004.txt	1	sGJT	36	immersion	1	G
00265018-0164-4417-8664-6eedd7839004.txt	1	sGJT	5	immersion	1	U
00265018-0164-4417-8664-6eedd7839004.txt	1	sGJT	2	immersion	1	G
00265018-0164-4417-8664-6eedd7839004.txt	1	sGJT	25	immersion	1	U
00265018-0164-4417-8664-6eedd7839004.txt	1	sGJT	34	immersion	1	G
00265018-0164-4417-8664-6eedd7839004.txt	1	sGJT	30	immersion	1	G
00265018-0164-4417-8664-6eedd7839004.txt	1	sGJT	15	immersion	1	U
00265018-0164-4417-8664-6eedd7839004.txt	1	sGJT	16	immersion	1	G
00265018-0164-4417-8664-6eedd7839004.txt	1	sGJT	19	immersion	1	U
00265018-0164-4417-8664-6eedd7839004.txt	1	sGJT	18	immersion	1	U
00265018-0164-4417-8664-6eedd7839004.txt	1	sGJT	7	immersion	1	G
00265018-0164-4417-8664-6eedd7839004.txt	1	sGJT	39	immersion	1	U
00265018-0164-4417-8664-6eedd7839004.txt	1	sGJT	23	immersion	1	G
00265018-0164-4417-8664-6eedd7839004.txt	1	sGJT	29	immersion	1	U
00265018-0164-4417-8664-6eedd7839004.txt	1	sGJT	17	immersion	1	G
00265018-0164-4417-8664-6eedd7839004.txt	1	sGJT	26	immersion	1	U
00265018-0164-4417-8664-6eedd7839004.txt	1	sGJT	30	immersion	1	U
00265018-0164-4417-8664-6eedd7839004.txt	1	sGJT	23	immersion	1	U
00265018-0164-4417-8664-6eedd7839004.txt	1	sGJT	4	immersion	1	U
00265018-0164-4417-8664-6eedd7839004.txt	1	sGJT	18	immersion	1	G
00265018-0164-4417-8664-6eedd7839004.txt	1	sGJT	40	immersion	1	G
00265018-0164-4417-8664-6eedd7839004.txt	1	sGJT	26	immersion	1	G
00265018-0164-4417-8664-6eedd7839004.txt	1	sGJT	13	immersion	1	U
00265018-0164-4417-8664-6eedd7839004.txt	1	sGJT	33	immersion	1	U
00265018-0164-4417-8664-6eedd7839004.txt	1	sGJT	32	immersion	1	U
00265018-0164-4417-8664-6eedd7839004.txt	1	sGJT	13	immersion	1	G
00265018-0164-4417-8664-6eedd7839004.txt	1	sGJT	9	immersion	1	U
00265018-0164-4417-8664-6eedd7839004.txt	1	sGJT	6	immersion	1	U
00265018-0164-4417-8664-6eedd7839004.txt	1	sGJT	19	immersion	1	G
04f9b338-5c6e-47da-9257-32234505c9ba.txt	1	sGJT	39	native	1	U
04f9b338-5c6e-47da-9257-32234505c9ba.txt	1	sGJT	36	native	1	G
04f9b338-5c6e-47da-9257-32234505c9ba.txt	1	sGJT	2	native	1	U
04f9b338-5c6e-47da-9257-32234505c9ba.txt	0	sGJT	26	native	1	U
04f9b338-5c6e-47da-9257-32234505c9ba.txt	1	sGJT	9	native	1	U
04f9b338-5c6e-47da-9257-32234505c9ba.txt	1	sGJT	14	native	1	U
04f9b338-5c6e-47da-9257-32234505c9ba.txt	1	sGJT	18	native	1	U
04f9b338-5c6e-47da-9257-32234505c9ba.txt	1	sGJT	30	native	1	G
04f9b338-5c6e-47da-9257-32234505c9ba.txt	1	sGJT	7	native	1	U
04f9b338-5c6e-47da-9257-32234505c9ba.txt	1	sGJT	40	native	1	G
04f9b338-5c6e-47da-9257-32234505c9ba.txt	1	sGJT	20	native	1	U
04f9b338-5c6e-47da-9257-32234505c9ba.txt	1	sGJT	25	native	1	G
04f9b338-5c6e-47da-9257-32234505c9ba.txt	1	sGJT	10	native	1	G
04f9b338-5c6e-47da-9257-32234505c9ba.txt	0	sGJT	22	native	1	U
04f9b338-5c6e-47da-9257-32234505c9ba.txt	1	sGJT	3	native	1	G
04f9b338-5c6e-47da-9257-32234505c9ba.txt	1	sGJT	3	native	1	U
04f9b338-5c6e-47da-9257-32234505c9ba.txt	1	sGJT	21	native	1	G
04f9b338-5c6e-47da-9257-32234505c9ba.txt	1	sGJT	28	native	1	U
04f9b338-5c6e-47da-9257-32234505c9ba.txt	1	sGJT	21	native	1	U
04f9b338-5c6e-47da-9257-32234505c9ba.txt	1	sGJT	31	native	1	G
04f9b338-5c6e-47da-9257-32234505c9ba.txt	1	sGJT	15	native	1	G
04f9b338-5c6e-47da-9257-32234505c9ba.txt	1	sGJT	13	native	1	G
04f9b338-5c6e-47da-9257-32234505c9ba.txt	1	sGJT	9	native	1	G
04f9b338-5c6e-47da-9257-32234505c9ba.txt	1	sGJT	13	native	1	U
04f9b338-5c6e-47da-9257-32234505c9ba.txt	1	sGJT	16	native	1	G
04f9b338-5c6e-47da-9257-32234505c9ba.txt	1	sGJT	32	native	1	G
04f9b338-5c6e-47da-9257-32234505c9ba.txt	1	sGJT	28	native	1	G
04f9b338-5c6e-47da-9257-32234505c9ba.txt	1	sGJT	10	native	1	U
04f9b338-5c6e-47da-9257-32234505c9ba.txt	1	sGJT	38	native	1	U
04f9b338-5c6e-47da-9257-32234505c9ba.txt	1	sGJT	33	native	1	U
04f9b338-5c6e-47da-9257-32234505c9ba.txt	0	sGJT	30	native	1	U
04f9b338-5c6e-47da-9257-32234505c9ba.txt	0	sGJT	1	native	1	U
04f9b338-5c6e-47da-9257-32234505c9ba.txt	1	sGJT	5	native	1	U
04f9b338-5c6e-47da-9257-32234505c9ba.txt	1	sGJT	24	native	1	G
04f9b338-5c6e-47da-9257-32234505c9ba.txt	1	sGJT	34	native	1	U
04f9b338-5c6e-47da-9257-32234505c9ba.txt	1	sGJT	32	native	1	U
04f9b338-5c6e-47da-9257-32234505c9ba.txt	1	sGJT	27	native	1	U
04f9b338-5c6e-47da-9257-32234505c9ba.txt	1	sGJT	29	native	1	G
04f9b338-5c6e-47da-9257-32234505c9ba.txt	1	sGJT	1	native	1	G
04f9b338-5c6e-47da-9257-32234505c9ba.txt	1	sGJT	12	native	1	G
04f9b338-5c6e-47da-9257-32234505c9ba.txt	1	sGJT	2	native	1	G
04f9b338-5c6e-47da-9257-32234505c9ba.txt	1	sGJT	12	native	1	U
04f9b338-5c6e-47da-9257-32234505c9ba.txt	1	sGJT	31	native	1	U
04f9b338-5c6e-47da-9257-32234505c9ba.txt	1	sGJT	11	native	1	G
04f9b338-5c6e-47da-9257-32234505c9ba.txt	0	sGJT	16	native	1	U
04f9b338-5c6e-47da-9257-32234505c9ba.txt	1	sGJT	19	native	1	U
04f9b338-5c6e-47da-9257-32234505c9ba.txt	1	sGJT	7	native	1	G
04f9b338-5c6e-47da-9257-32234505c9ba.txt	0	sGJT	40	native	1	U
04f9b338-5c6e-47da-9257-32234505c9ba.txt	1	sGJT	8	native	1	U
04f9b338-5c6e-47da-9257-32234505c9ba.txt	1	sGJT	23	native	1	G
04f9b338-5c6e-47da-9257-32234505c9ba.txt	1	sGJT	18	native	1	G
04f9b338-5c6e-47da-9257-32234505c9ba.txt	1	sGJT	19	native	1	G
04f9b338-5c6e-47da-9257-32234505c9ba.txt	1	sGJT	37	native	1	U
04f9b338-5c6e-47da-9257-32234505c9ba.txt	1	sGJT	33	native	1	G
04f9b338-5c6e-47da-9257-32234505c9ba.txt	1	sGJT	4	native	1	G
04f9b338-5c6e-47da-9257-32234505c9ba.txt	1	sGJT	17	native	1	G
04f9b338-5c6e-47da-9257-32234505c9ba.txt	1	sGJT	27	native	1	G
04f9b338-5c6e-47da-9257-32234505c9ba.txt	1	sGJT	29	native	1	U
04f9b338-5c6e-47da-9257-32234505c9ba.txt	1	sGJT	37	native	1	G
04f9b338-5c6e-47da-9257-32234505c9ba.txt	1	sGJT	24	native	1	U
04f9b338-5c6e-47da-9257-32234505c9ba.txt	0	sGJT	23	native	1	U
04f9b338-5c6e-47da-9257-32234505c9ba.txt	0	sGJT	6	native	1	U
04f9b338-5c6e-47da-9257-32234505c9ba.txt	1	sGJT	6	native	1	G
04f9b338-5c6e-47da-9257-32234505c9ba.txt	1	sGJT	25	native	1	U
04f9b338-5c6e-47da-9257-32234505c9ba.txt	1	sGJT	34	native	1	G
04f9b338-5c6e-47da-9257-32234505c9ba.txt	1	sGJT	8	native	1	G
04f9b338-5c6e-47da-9257-32234505c9ba.txt	1	sGJT	5	native	1	G
04f9b338-5c6e-47da-9257-32234505c9ba.txt	1	sGJT	38	native	1	G
04f9b338-5c6e-47da-9257-32234505c9ba.txt	1	sGJT	35	native	1	G
04f9b338-5c6e-47da-9257-32234505c9ba.txt	1	sGJT	39	native	1	G
04f9b338-5c6e-47da-9257-32234505c9ba.txt	1	sGJT	36	native	1	U
04f9b338-5c6e-47da-9257-32234505c9ba.txt	0	sGJT	26	native	1	G
04f9b338-5c6e-47da-9257-32234505c9ba.txt	1	sGJT	11	native	1	U
04f9b338-5c6e-47da-9257-32234505c9ba.txt	1	sGJT	35	native	1	U
0ab92491-3f45-4510-931f-b50f1db260ff.txt	1	sGJT	24	immersion	1	U
0ab92491-3f45-4510-931f-b50f1db260ff.txt	1	sGJT	25	immersion	1	G
0ab92491-3f45-4510-931f-b50f1db260ff.txt	0	sGJT	12	immersion	1	G
0ab92491-3f45-4510-931f-b50f1db260ff.txt	1	sGJT	14	immersion	1	G
0ab92491-3f45-4510-931f-b50f1db260ff.txt	1	sGJT	31	immersion	1	U
0ab92491-3f45-4510-931f-b50f1db260ff.txt	1	sGJT	6	immersion	1	U
0ab92491-3f45-4510-931f-b50f1db260ff.txt	1	sGJT	10	immersion	1	G
0ab92491-3f45-4510-931f-b50f1db260ff.txt	1	sGJT	26	immersion	1	U
0ab92491-3f45-4510-931f-b50f1db260ff.txt	1	sGJT	36	immersion	1	G
0ab92491-3f45-4510-931f-b50f1db260ff.txt	1	sGJT	34	immersion	1	G
0ab92491-3f45-4510-931f-b50f1db260ff.txt	1	sGJT	1	immersion	1	U
0ab92491-3f45-4510-931f-b50f1db260ff.txt	1	sGJT	23	immersion	1	G
0ab92491-3f45-4510-931f-b50f1db260ff.txt	1	sGJT	1	immersion	1	G
0ab92491-3f45-4510-931f-b50f1db260ff.txt	0	sGJT	33	immersion	1	G
0ab92491-3f45-4510-931f-b50f1db260ff.txt	1	sGJT	20	immersion	1	U
0ab92491-3f45-4510-931f-b50f1db260ff.txt	1	sGJT	18	immersion	1	U
0ab92491-3f45-4510-931f-b50f1db260ff.txt	1	sGJT	37	immersion	1	G
0ab92491-3f45-4510-931f-b50f1db260ff.txt	1	sGJT	7	immersion	1	G
0ab92491-3f45-4510-931f-b50f1db260ff.txt	0	sGJT	19	immersion	1	U
0ab92491-3f45-4510-931f-b50f1db260ff.txt	1	sGJT	4	immersion	1	U
0ab92491-3f45-4510-931f-b50f1db260ff.txt	1	sGJT	30	immersion	1	G
0ab92491-3f45-4510-931f-b50f1db260ff.txt	1	sGJT	3	immersion	1	U
0ab92491-3f45-4510-931f-b50f1db260ff.txt	0	sGJT	29	immersion	1	U
0ab92491-3f45-4510-931f-b50f1db260ff.txt	1	sGJT	36	immersion	1	U
0ab92491-3f45-4510-931f-b50f1db260ff.txt	0	sGJT	27	immersion	1	G
0ab92491-3f45-4510-931f-b50f1db260ff.txt	1	sGJT	13	immersion	1	G
0ab92491-3f45-4510-931f-b50f1db260ff.txt	1	sGJT	25	immersion	1	U
0ab92491-3f45-4510-931f-b50f1db260ff.txt	0	sGJT	11	immersion	1	G
0ab92491-3f45-4510-931f-b50f1db260ff.txt	1	sGJT	33	immersion	1	U
0ab92491-3f45-4510-931f-b50f1db260ff.txt	1	sGJT	28	immersion	1	U
0ab92491-3f45-4510-931f-b50f1db260ff.txt	1	sGJT	34	immersion	1	U
0ab92491-3f45-4510-931f-b50f1db260ff.txt	1	sGJT	9	immersion	1	U
0ab92491-3f45-4510-931f-b50f1db260ff.txt	1	sGJT	39	immersion	1	U
0ab92491-3f45-4510-931f-b50f1db260ff.txt	0	sGJT	28	immersion	1	G
0ab92491-3f45-4510-931f-b50f1db260ff.txt	1	sGJT	17	immersion	1	U
0ab92491-3f45-4510-931f-b50f1db260ff.txt	0	sGJT	5	immersion	1	U
0ab92491-3f45-4510-931f-b50f1db260ff.txt	0	sGJT	14	immersion	1	U
0ab92491-3f45-4510-931f-b50f1db260ff.txt	1	sGJT	32	immersion	1	U
0ab92491-3f45-4510-931f-b50f1db260ff.txt	1	sGJT	38	immersion	1	U
0ab92491-3f45-4510-931f-b50f1db260ff.txt	1	sGJT	26	immersion	1	G
0ab92491-3f45-4510-931f-b50f1db260ff.txt	1	sGJT	20	immersion	1	G
0ab92491-3f45-4510-931f-b50f1db260ff.txt	1	sGJT	3	immersion	1	G
0ab92491-3f45-4510-931f-b50f1db260ff.txt	1	sGJT	23	immersion	1	U
0ab92491-3f45-4510-931f-b50f1db260ff.txt	0	sGJT	21	immersion	1	U
0ab92491-3f45-4510-931f-b50f1db260ff.txt	1	sGJT	2	immersion	1	U
0ab92491-3f45-4510-931f-b50f1db260ff.txt	1	sGJT	22	immersion	1	G
0ab92491-3f45-4510-931f-b50f1db260ff.txt	1	sGJT	16	immersion	1	G
0ab92491-3f45-4510-931f-b50f1db260ff.txt	1	sGJT	19	immersion	1	G
0ab92491-3f45-4510-931f-b50f1db260ff.txt	1	sGJT	24	immersion	1	G
0ab92491-3f45-4510-931f-b50f1db260ff.txt	1	sGJT	32	immersion	1	G
0ab92491-3f45-4510-931f-b50f1db260ff.txt	1	sGJT	18	immersion	1	G
0ab92491-3f45-4510-931f-b50f1db260ff.txt	1	sGJT	10	immersion	1	U
0ab92491-3f45-4510-931f-b50f1db260ff.txt	0	sGJT	22	immersion	1	U
0ab92491-3f45-4510-931f-b50f1db260ff.txt	1	sGJT	8	immersion	1	U
0ab92491-3f45-4510-931f-b50f1db260ff.txt	0	sGJT	15	immersion	1	U
0ab92491-3f45-4510-931f-b50f1db260ff.txt	1	sGJT	39	immersion	1	G
0ab92491-3f45-4510-931f-b50f1db260ff.txt	1	sGJT	21	immersion	1	G
0ab92491-3f45-4510-931f-b50f1db260ff.txt	1	sGJT	11	immersion	1	U
0ab92491-3f45-4510-931f-b50f1db260ff.txt	1	sGJT	30	immersion	1	U
0ab92491-3f45-4510-931f-b50f1db260ff.txt	1	sGJT	35	immersion	1	U
0ab92491-3f45-4510-931f-b50f1db260ff.txt	1	sGJT	8	immersion	1	G
0ab92491-3f45-4510-931f-b50f1db260ff.txt	1	sGJT	31	immersion	1	G
0ab92491-3f45-4510-931f-b50f1db260ff.txt	1	sGJT	15	immersion	1	G
0ab92491-3f45-4510-931f-b50f1db260ff.txt	1	sGJT	4	immersion	1	G
0ab92491-3f45-4510-931f-b50f1db260ff.txt	1	sGJT	17	immersion	1	G
0ab92491-3f45-4510-931f-b50f1db260ff.txt	1	sGJT	35	immersion	1	G
0ab92491-3f45-4510-931f-b50f1db260ff.txt	1	sGJT	2	immersion	1	G
0ab92491-3f45-4510-931f-b50f1db260ff.txt	1	sGJT	38	immersion	1	G
0ab92491-3f45-4510-931f-b50f1db260ff.txt	1	sGJT	16	immersion	1	U
0ab92491-3f45-4510-931f-b50f1db260ff.txt	1	sGJT	40	immersion	1	U
0ab92491-3f45-4510-931f-b50f1db260ff.txt	1	sGJT	12	immersion	1	U
0ab92491-3f45-4510-931f-b50f1db260ff.txt	1	sGJT	5	immersion	1	G
0ab92491-3f45-4510-931f-b50f1db260ff.txt	1	sGJT	29	immersion	1	G
0ab92491-3f45-4510-931f-b50f1db260ff.txt	1	sGJT	9	immersion	1	G
0ab92491-3f45-4510-931f-b50f1db260ff.txt	1	sGJT	6	immersion	1	G
0ab92491-3f45-4510-931f-b50f1db260ff.txt	1	sGJT	7	immersion	1	U
0ab92491-3f45-4510-931f-b50f1db260ff.txt	1	sGJT	40	immersion	1	G
0ab92491-3f45-4510-931f-b50f1db260ff.txt	1	sGJT	37	immersion	1	U
0ab92491-3f45-4510-931f-b50f1db260ff.txt	1	sGJT	27	immersion	1	U
0ab92491-3f45-4510-931f-b50f1db260ff.txt	1	sGJT	13	immersion	1	U
0bb95291-81d9-409d-9af2-27773224bef9.txt	0	sGJT	16	classroom	1	U
0bb95291-81d9-409d-9af2-27773224bef9.txt	1	sGJT	37	classroom	1	G
0bb95291-81d9-409d-9af2-27773224bef9.txt	0	sGJT	33	classroom	1	U
0bb95291-81d9-409d-9af2-27773224bef9.txt	1	sGJT	13	classroom	1	G
0bb95291-81d9-409d-9af2-27773224bef9.txt	1	sGJT	24	classroom	1	G
0bb95291-81d9-409d-9af2-27773224bef9.txt	1	sGJT	36	classroom	1	G
0bb95291-81d9-409d-9af2-27773224bef9.txt	0	sGJT	17	classroom	1	U
0bb95291-81d9-409d-9af2-27773224bef9.txt	1	sGJT	8	classroom	1	U
0bb95291-81d9-409d-9af2-27773224bef9.txt	1	sGJT	35	classroom	1	G
0bb95291-81d9-409d-9af2-27773224bef9.txt	0	sGJT	26	classroom	1	U
0bb95291-81d9-409d-9af2-27773224bef9.txt	1	sGJT	33	classroom	1	G
0bb95291-81d9-409d-9af2-27773224bef9.txt	0	sGJT	29	classroom	1	U
0bb95291-81d9-409d-9af2-27773224bef9.txt	1	sGJT	31	classroom	1	G
0bb95291-81d9-409d-9af2-27773224bef9.txt	0	sGJT	34	classroom	1	G
0bb95291-81d9-409d-9af2-27773224bef9.txt	1	sGJT	23	classroom	1	G
0bb95291-81d9-409d-9af2-27773224bef9.txt	1	sGJT	14	classroom	1	U
0bb95291-81d9-409d-9af2-27773224bef9.txt	0	sGJT	21	classroom	1	G
0bb95291-81d9-409d-9af2-27773224bef9.txt	1	sGJT	8	classroom	1	G
0bb95291-81d9-409d-9af2-27773224bef9.txt	1	sGJT	7	classroom	1	G
0bb95291-81d9-409d-9af2-27773224bef9.txt	1	sGJT	10	classroom	1	U
0bb95291-81d9-409d-9af2-27773224bef9.txt	1	sGJT	28	classroom	1	G
0bb95291-81d9-409d-9af2-27773224bef9.txt	0	sGJT	20	classroom	1	U
0bb95291-81d9-409d-9af2-27773224bef9.txt	1	sGJT	18	classroom	1	U
0bb95291-81d9-409d-9af2-27773224bef9.txt	0	sGJT	31	classroom	1	U
0bb95291-81d9-409d-9af2-27773224bef9.txt	0	sGJT	26	classroom	1	G
0bb95291-81d9-409d-9af2-27773224bef9.txt	0	sGJT	25	classroom	1	U
0bb95291-81d9-409d-9af2-27773224bef9.txt	1	sGJT	40	classroom	1	U
0bb95291-81d9-409d-9af2-27773224bef9.txt	0	sGJT	24	classroom	1	U
0bb95291-81d9-409d-9af2-27773224bef9.txt	1	sGJT	22	classroom	1	U
0bb95291-81d9-409d-9af2-27773224bef9.txt	1	sGJT	6	classroom	1	G
0bb95291-81d9-409d-9af2-27773224bef9.txt	0	sGJT	27	classroom	1	U
0bb95291-81d9-409d-9af2-27773224bef9.txt	1	sGJT	35	classroom	1	U
0bb95291-81d9-409d-9af2-27773224bef9.txt	1	sGJT	4	classroom	1	G
0bb95291-81d9-409d-9af2-27773224bef9.txt	1	sGJT	37	classroom	1	U
0bb95291-81d9-409d-9af2-27773224bef9.txt	1	sGJT	5	classroom	1	U
0bb95291-81d9-409d-9af2-27773224bef9.txt	1	sGJT	39	classroom	1	U
0bb95291-81d9-409d-9af2-27773224bef9.txt	0	sGJT	30	classroom	1	U
0bb95291-81d9-409d-9af2-27773224bef9.txt	1	sGJT	10	classroom	1	G
0bb95291-81d9-409d-9af2-27773224bef9.txt	0	sGJT	21	classroom	1	U
0bb95291-81d9-409d-9af2-27773224bef9.txt	1	sGJT	40	classroom	1	G
0bb95291-81d9-409d-9af2-27773224bef9.txt	1	sGJT	30	classroom	1	G
0bb95291-81d9-409d-9af2-27773224bef9.txt	1	sGJT	4	classroom	1	U
0bb95291-81d9-409d-9af2-27773224bef9.txt	1	sGJT	15	classroom	1	G
0bb95291-81d9-409d-9af2-27773224bef9.txt	1	sGJT	11	classroom	1	G
0bb95291-81d9-409d-9af2-27773224bef9.txt	1	sGJT	32	classroom	1	G
0bb95291-81d9-409d-9af2-27773224bef9.txt	1	sGJT	12	classroom	1	G
0bb95291-81d9-409d-9af2-27773224bef9.txt	0	sGJT	2	classroom	1	G
0bb95291-81d9-409d-9af2-27773224bef9.txt	1	sGJT	9	classroom	1	G
0bb95291-81d9-409d-9af2-27773224bef9.txt	0	sGJT	34	classroom	1	U
0bb95291-81d9-409d-9af2-27773224bef9.txt	0	sGJT	29	classroom	1	G
0bb95291-81d9-409d-9af2-27773224bef9.txt	1	sGJT	18	classroom	1	G
0bb95291-81d9-409d-9af2-27773224bef9.txt	1	sGJT	16	classroom	1	G
0bb95291-81d9-409d-9af2-27773224bef9.txt	1	sGJT	38	classroom	1	U
0bb95291-81d9-409d-9af2-27773224bef9.txt	0	sGJT	1	classroom	1	G
0bb95291-81d9-409d-9af2-27773224bef9.txt	0	sGJT	17	classroom	1	G
0bb95291-81d9-409d-9af2-27773224bef9.txt	0	sGJT	36	classroom	1	U
0bb95291-81d9-409d-9af2-27773224bef9.txt	1	sGJT	25	classroom	1	G
0bb95291-81d9-409d-9af2-27773224bef9.txt	0	sGJT	32	classroom	1	U
0bb95291-81d9-409d-9af2-27773224bef9.txt	1	sGJT	11	classroom	1	U
0bb95291-81d9-409d-9af2-27773224bef9.txt	1	sGJT	27	classroom	1	G
0bb95291-81d9-409d-9af2-27773224bef9.txt	1	sGJT	3	classroom	1	G
0bb95291-81d9-409d-9af2-27773224bef9.txt	1	sGJT	9	classroom	1	U
0bb95291-81d9-409d-9af2-27773224bef9.txt	0	sGJT	22	classroom	1	G
0bb95291-81d9-409d-9af2-27773224bef9.txt	0	sGJT	13	classroom	1	U
0bb95291-81d9-409d-9af2-27773224bef9.txt	1	sGJT	14	classroom	1	G
0bb95291-81d9-409d-9af2-27773224bef9.txt	0	sGJT	39	classroom	1	G
0bb95291-81d9-409d-9af2-27773224bef9.txt	0	sGJT	15	classroom	1	U
0bb95291-81d9-409d-9af2-27773224bef9.txt	1	sGJT	20	classroom	1	G
0bb95291-81d9-409d-9af2-27773224bef9.txt	0	sGJT	6	classroom	1	U
0bb95291-81d9-409d-9af2-27773224bef9.txt	0	sGJT	12	classroom	1	U
0bb95291-81d9-409d-9af2-27773224bef9.txt	0	sGJT	1	classroom	1	U
0bb95291-81d9-409d-9af2-27773224bef9.txt	1	sGJT	7	classroom	1	U
0bb95291-81d9-409d-9af2-27773224bef9.txt	0	sGJT	2	classroom	1	U
0bb95291-81d9-409d-9af2-27773224bef9.txt	0	sGJT	28	classroom	1	U
0bb95291-81d9-409d-9af2-27773224bef9.txt	1	sGJT	5	classroom	1	G
0bb95291-81d9-409d-9af2-27773224bef9.txt	1	sGJT	19	classroom	1	G
0bb95291-81d9-409d-9af2-27773224bef9.txt	1	sGJT	38	classroom	1	G
0bb95291-81d9-409d-9af2-27773224bef9.txt	0	sGJT	23	classroom	1	U
0bb95291-81d9-409d-9af2-27773224bef9.txt	0	sGJT	3	classroom	1	U
0be0fad6-c464-4f26-aeba-c671e3e0f840.txt	1	sGJT	1	classroom	1	U
0be0fad6-c464-4f26-aeba-c671e3e0f840.txt	1	sGJT	35	classroom	1	U
0be0fad6-c464-4f26-aeba-c671e3e0f840.txt	1	sGJT	29	classroom	1	U
0be0fad6-c464-4f26-aeba-c671e3e0f840.txt	1	sGJT	40	classroom	1	G
0be0fad6-c464-4f26-aeba-c671e3e0f840.txt	1	sGJT	34	classroom	1	U
0be0fad6-c464-4f26-aeba-c671e3e0f840.txt	0	sGJT	19	classroom	1	U
0be0fad6-c464-4f26-aeba-c671e3e0f840.txt	1	sGJT	2	classroom	1	U
0be0fad6-c464-4f26-aeba-c671e3e0f840.txt	1	sGJT	21	classroom	1	U
0be0fad6-c464-4f26-aeba-c671e3e0f840.txt	0	sGJT	26	classroom	1	U
0be0fad6-c464-4f26-aeba-c671e3e0f840.txt	0	sGJT	15	classroom	1	U
0be0fad6-c464-4f26-aeba-c671e3e0f840.txt	1	sGJT	21	classroom	1	G
0be0fad6-c464-4f26-aeba-c671e3e0f840.txt	0	sGJT	4	classroom	1	G
0be0fad6-c464-4f26-aeba-c671e3e0f840.txt	0	sGJT	2	classroom	1	G
0be0fad6-c464-4f26-aeba-c671e3e0f840.txt	1	sGJT	13	classroom	1	G
0be0fad6-c464-4f26-aeba-c671e3e0f840.txt	0	sGJT	26	classroom	1	G
0be0fad6-c464-4f26-aeba-c671e3e0f840.txt	1	sGJT	6	classroom	1	U
0be0fad6-c464-4f26-aeba-c671e3e0f840.txt	1	sGJT	8	classroom	1	U
0be0fad6-c464-4f26-aeba-c671e3e0f840.txt	1	sGJT	36	classroom	1	U
0be0fad6-c464-4f26-aeba-c671e3e0f840.txt	1	sGJT	12	classroom	1	U
0be0fad6-c464-4f26-aeba-c671e3e0f840.txt	1	sGJT	3	classroom	1	U
0be0fad6-c464-4f26-aeba-c671e3e0f840.txt	1	sGJT	7	classroom	1	U
0be0fad6-c464-4f26-aeba-c671e3e0f840.txt	1	sGJT	32	classroom	1	U
0be0fad6-c464-4f26-aeba-c671e3e0f840.txt	0	sGJT	13	classroom	1	U
0be0fad6-c464-4f26-aeba-c671e3e0f840.txt	1	sGJT	5	classroom	1	U
0be0fad6-c464-4f26-aeba-c671e3e0f840.txt	1	sGJT	38	classroom	1	U
0be0fad6-c464-4f26-aeba-c671e3e0f840.txt	0	sGJT	19	classroom	1	G
0be0fad6-c464-4f26-aeba-c671e3e0f840.txt	1	sGJT	11	classroom	1	U
0be0fad6-c464-4f26-aeba-c671e3e0f840.txt	0	sGJT	33	classroom	1	U
0be0fad6-c464-4f26-aeba-c671e3e0f840.txt	1	sGJT	28	classroom	1	G
0be0fad6-c464-4f26-aeba-c671e3e0f840.txt	1	sGJT	1	classroom	1	G
0be0fad6-c464-4f26-aeba-c671e3e0f840.txt	1	sGJT	37	classroom	1	U
0be0fad6-c464-4f26-aeba-c671e3e0f840.txt	1	sGJT	3	classroom	1	G
0be0fad6-c464-4f26-aeba-c671e3e0f840.txt	1	sGJT	9	classroom	1	U
0be0fad6-c464-4f26-aeba-c671e3e0f840.txt	0	sGJT	28	classroom	1	U
0be0fad6-c464-4f26-aeba-c671e3e0f840.txt	0	sGJT	25	classroom	1	U
0be0fad6-c464-4f26-aeba-c671e3e0f840.txt	1	sGJT	24	classroom	1	U
0be0fad6-c464-4f26-aeba-c671e3e0f840.txt	1	sGJT	9	classroom	1	G
0be0fad6-c464-4f26-aeba-c671e3e0f840.txt	0	sGJT	22	classroom	1	U
0be0fad6-c464-4f26-aeba-c671e3e0f840.txt	1	sGJT	39	classroom	1	G
0be0fad6-c464-4f26-aeba-c671e3e0f840.txt	1	sGJT	6	classroom	1	G
0be0fad6-c464-4f26-aeba-c671e3e0f840.txt	0	sGJT	17	classroom	1	G
0be0fad6-c464-4f26-aeba-c671e3e0f840.txt	1	sGJT	10	classroom	1	G
0be0fad6-c464-4f26-aeba-c671e3e0f840.txt	1	sGJT	37	classroom	1	G
0be0fad6-c464-4f26-aeba-c671e3e0f840.txt	0	sGJT	29	classroom	1	G
0be0fad6-c464-4f26-aeba-c671e3e0f840.txt	1	sGJT	23	classroom	1	U
0be0fad6-c464-4f26-aeba-c671e3e0f840.txt	0	sGJT	5	classroom	1	G
0be0fad6-c464-4f26-aeba-c671e3e0f840.txt	1	sGJT	18	classroom	1	G
0be0fad6-c464-4f26-aeba-c671e3e0f840.txt	1	sGJT	40	classroom	1	U
0be0fad6-c464-4f26-aeba-c671e3e0f840.txt	0	sGJT	31	classroom	1	U
0be0fad6-c464-4f26-aeba-c671e3e0f840.txt	1	sGJT	10	classroom	1	U
0be0fad6-c464-4f26-aeba-c671e3e0f840.txt	1	sGJT	25	classroom	1	G
0be0fad6-c464-4f26-aeba-c671e3e0f840.txt	1	sGJT	14	classroom	1	G
0be0fad6-c464-4f26-aeba-c671e3e0f840.txt	1	sGJT	32	classroom	1	G
0be0fad6-c464-4f26-aeba-c671e3e0f840.txt	1	sGJT	8	classroom	1	G
0be0fad6-c464-4f26-aeba-c671e3e0f840.txt	1	sGJT	12	classroom	1	G
0be0fad6-c464-4f26-aeba-c671e3e0f840.txt	1	sGJT	23	classroom	1	G
0be0fad6-c464-4f26-aeba-c671e3e0f840.txt	1	sGJT	20	classroom	1	U
0be0fad6-c464-4f26-aeba-c671e3e0f840.txt	1	sGJT	16	classroom	1	U
0be0fad6-c464-4f26-aeba-c671e3e0f840.txt	1	sGJT	16	classroom	1	G
0be0fad6-c464-4f26-aeba-c671e3e0f840.txt	1	sGJT	7	classroom	1	G
0be0fad6-c464-4f26-aeba-c671e3e0f840.txt	1	sGJT	24	classroom	1	G
0be0fad6-c464-4f26-aeba-c671e3e0f840.txt	1	sGJT	14	classroom	1	U
0be0fad6-c464-4f26-aeba-c671e3e0f840.txt	1	sGJT	33	classroom	1	G
0be0fad6-c464-4f26-aeba-c671e3e0f840.txt	1	sGJT	20	classroom	1	G
0be0fad6-c464-4f26-aeba-c671e3e0f840.txt	1	sGJT	11	classroom	1	G
0be0fad6-c464-4f26-aeba-c671e3e0f840.txt	1	sGJT	15	classroom	1	G
0be0fad6-c464-4f26-aeba-c671e3e0f840.txt	1	sGJT	36	classroom	1	G
0be0fad6-c464-4f26-aeba-c671e3e0f840.txt	1	sGJT	27	classroom	1	U
0be0fad6-c464-4f26-aeba-c671e3e0f840.txt	1	sGJT	38	classroom	1	G
0be0fad6-c464-4f26-aeba-c671e3e0f840.txt	1	sGJT	4	classroom	1	U
0be0fad6-c464-4f26-aeba-c671e3e0f840.txt	1	sGJT	17	classroom	1	U
0be0fad6-c464-4f26-aeba-c671e3e0f840.txt	0	sGJT	22	classroom	1	G
0be0fad6-c464-4f26-aeba-c671e3e0f840.txt	1	sGJT	34	classroom	1	G
0be0fad6-c464-4f26-aeba-c671e3e0f840.txt	1	sGJT	30	classroom	1	G
0be0fad6-c464-4f26-aeba-c671e3e0f840.txt	1	sGJT	27	classroom	1	G
0be0fad6-c464-4f26-aeba-c671e3e0f840.txt	1	sGJT	18	classroom	1	U
0e0b338e-b361-409d-a2e2-415b77dbcf9b.txt	1	sGJT	17	native	1	G
0e0b338e-b361-409d-a2e2-415b77dbcf9b.txt	1	sGJT	35	native	1	G
0e0b338e-b361-409d-a2e2-415b77dbcf9b.txt	1	sGJT	31	native	1	U
0e0b338e-b361-409d-a2e2-415b77dbcf9b.txt	1	sGJT	28	native	1	U
0e0b338e-b361-409d-a2e2-415b77dbcf9b.txt	1	sGJT	40	native	1	G
0e0b338e-b361-409d-a2e2-415b77dbcf9b.txt	1	sGJT	33	native	1	U
0e0b338e-b361-409d-a2e2-415b77dbcf9b.txt	1	sGJT	15	native	1	G
0e0b338e-b361-409d-a2e2-415b77dbcf9b.txt	1	sGJT	35	native	1	U
0e0b338e-b361-409d-a2e2-415b77dbcf9b.txt	0	sGJT	2	native	1	U
0e0b338e-b361-409d-a2e2-415b77dbcf9b.txt	1	sGJT	36	native	1	U
0e0b338e-b361-409d-a2e2-415b77dbcf9b.txt	1	sGJT	9	native	1	U
0e0b338e-b361-409d-a2e2-415b77dbcf9b.txt	1	sGJT	34	native	1	U
0e0b338e-b361-409d-a2e2-415b77dbcf9b.txt	1	sGJT	1	native	1	G
0e0b338e-b361-409d-a2e2-415b77dbcf9b.txt	1	sGJT	17	native	1	U
0e0b338e-b361-409d-a2e2-415b77dbcf9b.txt	1	sGJT	22	native	1	U
0e0b338e-b361-409d-a2e2-415b77dbcf9b.txt	1	sGJT	37	native	1	G
0e0b338e-b361-409d-a2e2-415b77dbcf9b.txt	1	sGJT	25	native	1	G
0e0b338e-b361-409d-a2e2-415b77dbcf9b.txt	1	sGJT	10	native	1	U
0e0b338e-b361-409d-a2e2-415b77dbcf9b.txt	1	sGJT	39	native	1	U
0e0b338e-b361-409d-a2e2-415b77dbcf9b.txt	1	sGJT	11	native	1	G
0e0b338e-b361-409d-a2e2-415b77dbcf9b.txt	1	sGJT	28	native	1	G
0e0b338e-b361-409d-a2e2-415b77dbcf9b.txt	1	sGJT	6	native	1	G
0e0b338e-b361-409d-a2e2-415b77dbcf9b.txt	0	sGJT	15	native	1	U
0e0b338e-b361-409d-a2e2-415b77dbcf9b.txt	1	sGJT	10	native	1	G
0e0b338e-b361-409d-a2e2-415b77dbcf9b.txt	1	sGJT	24	native	1	G
0e0b338e-b361-409d-a2e2-415b77dbcf9b.txt	1	sGJT	34	native	1	G
0e0b338e-b361-409d-a2e2-415b77dbcf9b.txt	1	sGJT	19	native	1	U
0e0b338e-b361-409d-a2e2-415b77dbcf9b.txt	1	sGJT	8	native	1	U
0e0b338e-b361-409d-a2e2-415b77dbcf9b.txt	1	sGJT	32	native	1	G
0e0b338e-b361-409d-a2e2-415b77dbcf9b.txt	0	sGJT	32	native	1	U
0e0b338e-b361-409d-a2e2-415b77dbcf9b.txt	1	sGJT	2	native	1	G
0e0b338e-b361-409d-a2e2-415b77dbcf9b.txt	1	sGJT	11	native	1	U
0e0b338e-b361-409d-a2e2-415b77dbcf9b.txt	1	sGJT	3	native	1	G
0e0b338e-b361-409d-a2e2-415b77dbcf9b.txt	1	sGJT	5	native	1	G
0e0b338e-b361-409d-a2e2-415b77dbcf9b.txt	1	sGJT	8	native	1	G
0e0b338e-b361-409d-a2e2-415b77dbcf9b.txt	1	sGJT	3	native	1	U
0e0b338e-b361-409d-a2e2-415b77dbcf9b.txt	1	sGJT	29	native	1	U
0e0b338e-b361-409d-a2e2-415b77dbcf9b.txt	1	sGJT	4	native	1	U
0e0b338e-b361-409d-a2e2-415b77dbcf9b.txt	1	sGJT	5	native	1	U
0e0b338e-b361-409d-a2e2-415b77dbcf9b.txt	1	sGJT	6	native	1	U
0e0b338e-b361-409d-a2e2-415b77dbcf9b.txt	1	sGJT	38	native	1	G
0e0b338e-b361-409d-a2e2-415b77dbcf9b.txt	1	sGJT	9	native	1	G
0e0b338e-b361-409d-a2e2-415b77dbcf9b.txt	1	sGJT	20	native	1	U
0e0b338e-b361-409d-a2e2-415b77dbcf9b.txt	1	sGJT	18	native	1	U
0e0b338e-b361-409d-a2e2-415b77dbcf9b.txt	1	sGJT	33	native	1	G
0e0b338e-b361-409d-a2e2-415b77dbcf9b.txt	1	sGJT	14	native	1	G
0e0b338e-b361-409d-a2e2-415b77dbcf9b.txt	1	sGJT	23	native	1	G
0e0b338e-b361-409d-a2e2-415b77dbcf9b.txt	0	sGJT	16	native	1	U
0e0b338e-b361-409d-a2e2-415b77dbcf9b.txt	1	sGJT	30	native	1	G
0e0b338e-b361-409d-a2e2-415b77dbcf9b.txt	1	sGJT	1	native	1	U
0e0b338e-b361-409d-a2e2-415b77dbcf9b.txt	1	sGJT	12	native	1	G
0e0b338e-b361-409d-a2e2-415b77dbcf9b.txt	1	sGJT	24	native	1	U
0e0b338e-b361-409d-a2e2-415b77dbcf9b.txt	1	sGJT	31	native	1	G
0e0b338e-b361-409d-a2e2-415b77dbcf9b.txt	1	sGJT	39	native	1	G
0e0b338e-b361-409d-a2e2-415b77dbcf9b.txt	1	sGJT	26	native	1	U
0e0b338e-b361-409d-a2e2-415b77dbcf9b.txt	1	sGJT	19	native	1	G
0e0b338e-b361-409d-a2e2-415b77dbcf9b.txt	1	sGJT	13	native	1	G
0e0b338e-b361-409d-a2e2-415b77dbcf9b.txt	1	sGJT	4	native	1	G
0e0b338e-b361-409d-a2e2-415b77dbcf9b.txt	1	sGJT	7	native	1	G
0e0b338e-b361-409d-a2e2-415b77dbcf9b.txt	1	sGJT	27	native	1	G
0e0b338e-b361-409d-a2e2-415b77dbcf9b.txt	1	sGJT	38	native	1	U
0e0b338e-b361-409d-a2e2-415b77dbcf9b.txt	1	sGJT	12	native	1	U
0e0b338e-b361-409d-a2e2-415b77dbcf9b.txt	1	sGJT	27	native	1	U
0e0b338e-b361-409d-a2e2-415b77dbcf9b.txt	1	sGJT	22	native	1	G
0e0b338e-b361-409d-a2e2-415b77dbcf9b.txt	1	sGJT	26	native	1	G
0e0b338e-b361-409d-a2e2-415b77dbcf9b.txt	1	sGJT	37	native	1	U
0e0b338e-b361-409d-a2e2-415b77dbcf9b.txt	1	sGJT	14	native	1	U
0e0b338e-b361-409d-a2e2-415b77dbcf9b.txt	1	sGJT	20	native	1	G
0e0b338e-b361-409d-a2e2-415b77dbcf9b.txt	1	sGJT	36	native	1	G
0e0b338e-b361-409d-a2e2-415b77dbcf9b.txt	0	sGJT	13	native	1	U
0e0b338e-b361-409d-a2e2-415b77dbcf9b.txt	1	sGJT	7	native	1	U
0e0b338e-b361-409d-a2e2-415b77dbcf9b.txt	1	sGJT	16	native	1	G
0e0b338e-b361-409d-a2e2-415b77dbcf9b.txt	1	sGJT	23	native	1	U
0e0b338e-b361-409d-a2e2-415b77dbcf9b.txt	1	sGJT	29	native	1	G
0e0b338e-b361-409d-a2e2-415b77dbcf9b.txt	1	sGJT	25	native	1	U
0e0b338e-b361-409d-a2e2-415b77dbcf9b.txt	1	sGJT	21	native	1	U
0e0b338e-b361-409d-a2e2-415b77dbcf9b.txt	1	sGJT	40	native	1	U
0e0b338e-b361-409d-a2e2-415b77dbcf9b.txt	1	sGJT	18	native	1	G
0e0b338e-b361-409d-a2e2-415b77dbcf9b.txt	1	sGJT	21	native	1	G
0e0b338e-b361-409d-a2e2-415b77dbcf9b.txt	1	sGJT	30	native	1	U
0f526e50-3ef8-4e43-8c1f-c1cc081e8deb.txt	1	sGJT	25	native	1	U
0f526e50-3ef8-4e43-8c1f-c1cc081e8deb.txt	1	sGJT	38	native	1	G
0f526e50-3ef8-4e43-8c1f-c1cc081e8deb.txt	1	sGJT	34	native	1	U
0f526e50-3ef8-4e43-8c1f-c1cc081e8deb.txt	1	sGJT	18	native	1	G
0f526e50-3ef8-4e43-8c1f-c1cc081e8deb.txt	1	sGJT	22	native	1	U
0f526e50-3ef8-4e43-8c1f-c1cc081e8deb.txt	1	sGJT	20	native	1	G
0f526e50-3ef8-4e43-8c1f-c1cc081e8deb.txt	0	sGJT	36	native	1	G
0f526e50-3ef8-4e43-8c1f-c1cc081e8deb.txt	1	sGJT	25	native	1	G
0f526e50-3ef8-4e43-8c1f-c1cc081e8deb.txt	1	sGJT	9	native	1	U
0f526e50-3ef8-4e43-8c1f-c1cc081e8deb.txt	0	sGJT	29	native	1	G
0f526e50-3ef8-4e43-8c1f-c1cc081e8deb.txt	1	sGJT	4	native	1	G
0f526e50-3ef8-4e43-8c1f-c1cc081e8deb.txt	1	sGJT	11	native	1	U
0f526e50-3ef8-4e43-8c1f-c1cc081e8deb.txt	1	sGJT	3	native	1	G
0f526e50-3ef8-4e43-8c1f-c1cc081e8deb.txt	1	sGJT	19	native	1	G
0f526e50-3ef8-4e43-8c1f-c1cc081e8deb.txt	1	sGJT	6	native	1	G
0f526e50-3ef8-4e43-8c1f-c1cc081e8deb.txt	1	sGJT	29	native	1	U
0f526e50-3ef8-4e43-8c1f-c1cc081e8deb.txt	1	sGJT	31	native	1	U
0f526e50-3ef8-4e43-8c1f-c1cc081e8deb.txt	1	sGJT	17	native	1	G
0f526e50-3ef8-4e43-8c1f-c1cc081e8deb.txt	1	sGJT	9	native	1	G
0f526e50-3ef8-4e43-8c1f-c1cc081e8deb.txt	1	sGJT	30	native	1	U
0f526e50-3ef8-4e43-8c1f-c1cc081e8deb.txt	1	sGJT	23	native	1	U
0f526e50-3ef8-4e43-8c1f-c1cc081e8deb.txt	1	sGJT	1	native	1	U
0f526e50-3ef8-4e43-8c1f-c1cc081e8deb.txt	1	sGJT	16	native	1	U
0f526e50-3ef8-4e43-8c1f-c1cc081e8deb.txt	1	sGJT	28	native	1	U
0f526e50-3ef8-4e43-8c1f-c1cc081e8deb.txt	1	sGJT	21	native	1	U
0f526e50-3ef8-4e43-8c1f-c1cc081e8deb.txt	1	sGJT	13	native	1	G
0f526e50-3ef8-4e43-8c1f-c1cc081e8deb.txt	1	sGJT	15	native	1	G
0f526e50-3ef8-4e43-8c1f-c1cc081e8deb.txt	1	sGJT	6	native	1	U
0f526e50-3ef8-4e43-8c1f-c1cc081e8deb.txt	1	sGJT	19	native	1	U
0f526e50-3ef8-4e43-8c1f-c1cc081e8deb.txt	1	sGJT	39	native	1	G
0f526e50-3ef8-4e43-8c1f-c1cc081e8deb.txt	1	sGJT	35	native	1	G
0f526e50-3ef8-4e43-8c1f-c1cc081e8deb.txt	1	sGJT	38	native	1	U
0f526e50-3ef8-4e43-8c1f-c1cc081e8deb.txt	1	sGJT	18	native	1	U
0f526e50-3ef8-4e43-8c1f-c1cc081e8deb.txt	1	sGJT	32	native	1	G
0f526e50-3ef8-4e43-8c1f-c1cc081e8deb.txt	1	sGJT	28	native	1	G
0f526e50-3ef8-4e43-8c1f-c1cc081e8deb.txt	1	sGJT	5	native	1	U
0f526e50-3ef8-4e43-8c1f-c1cc081e8deb.txt	1	sGJT	10	native	1	G
0f526e50-3ef8-4e43-8c1f-c1cc081e8deb.txt	1	sGJT	8	native	1	U
0f526e50-3ef8-4e43-8c1f-c1cc081e8deb.txt	1	sGJT	8	native	1	G
0f526e50-3ef8-4e43-8c1f-c1cc081e8deb.txt	1	sGJT	39	native	1	U
0f526e50-3ef8-4e43-8c1f-c1cc081e8deb.txt	1	sGJT	12	native	1	U
0f526e50-3ef8-4e43-8c1f-c1cc081e8deb.txt	1	sGJT	31	native	1	G
0f526e50-3ef8-4e43-8c1f-c1cc081e8deb.txt	1	sGJT	30	native	1	G
0f526e50-3ef8-4e43-8c1f-c1cc081e8deb.txt	1	sGJT	4	native	1	U
0f526e50-3ef8-4e43-8c1f-c1cc081e8deb.txt	1	sGJT	24	native	1	U
0f526e50-3ef8-4e43-8c1f-c1cc081e8deb.txt	1	sGJT	27	native	1	G
0f526e50-3ef8-4e43-8c1f-c1cc081e8deb.txt	1	sGJT	12	native	1	G
0f526e50-3ef8-4e43-8c1f-c1cc081e8deb.txt	1	sGJT	22	native	1	G
0f526e50-3ef8-4e43-8c1f-c1cc081e8deb.txt	1	sGJT	11	native	1	G
0f526e50-3ef8-4e43-8c1f-c1cc081e8deb.txt	1	sGJT	40	native	1	U
0f526e50-3ef8-4e43-8c1f-c1cc081e8deb.txt	0	sGJT	37	native	1	U
0f526e50-3ef8-4e43-8c1f-c1cc081e8deb.txt	1	sGJT	1	native	1	G
0f526e50-3ef8-4e43-8c1f-c1cc081e8deb.txt	1	sGJT	21	native	1	G
0f526e50-3ef8-4e43-8c1f-c1cc081e8deb.txt	1	sGJT	3	native	1	U
0f526e50-3ef8-4e43-8c1f-c1cc081e8deb.txt	1	sGJT	33	native	1	G
0f526e50-3ef8-4e43-8c1f-c1cc081e8deb.txt	1	sGJT	7	native	1	G
0f526e50-3ef8-4e43-8c1f-c1cc081e8deb.txt	1	sGJT	33	native	1	U
0f526e50-3ef8-4e43-8c1f-c1cc081e8deb.txt	1	sGJT	37	native	1	G
0f526e50-3ef8-4e43-8c1f-c1cc081e8deb.txt	1	sGJT	16	native	1	G
0f526e50-3ef8-4e43-8c1f-c1cc081e8deb.txt	1	sGJT	2	native	1	U
0f526e50-3ef8-4e43-8c1f-c1cc081e8deb.txt	1	sGJT	24	native	1	G
0f526e50-3ef8-4e43-8c1f-c1cc081e8deb.txt	1	sGJT	5	native	1	G
0f526e50-3ef8-4e43-8c1f-c1cc081e8deb.txt	1	sGJT	34	native	1	G
0f526e50-3ef8-4e43-8c1f-c1cc081e8deb.txt	1	sGJT	26	native	1	G
0f526e50-3ef8-4e43-8c1f-c1cc081e8deb.txt	0	sGJT	40	native	1	G
0f526e50-3ef8-4e43-8c1f-c1cc081e8deb.txt	1	sGJT	20	native	1	U
0f526e50-3ef8-4e43-8c1f-c1cc081e8deb.txt	1	sGJT	27	native	1	U
0f526e50-3ef8-4e43-8c1f-c1cc081e8deb.txt	1	sGJT	13	native	1	U
0f526e50-3ef8-4e43-8c1f-c1cc081e8deb.txt	1	sGJT	35	native	1	U
0f526e50-3ef8-4e43-8c1f-c1cc081e8deb.txt	1	sGJT	36	native	1	U
0f526e50-3ef8-4e43-8c1f-c1cc081e8deb.txt	1	sGJT	32	native	1	U
0f526e50-3ef8-4e43-8c1f-c1cc081e8deb.txt	1	sGJT	14	native	1	U
0f526e50-3ef8-4e43-8c1f-c1cc081e8deb.txt	1	sGJT	26	native	1	U
0f526e50-3ef8-4e43-8c1f-c1cc081e8deb.txt	1	sGJT	2	native	1	G
0f526e50-3ef8-4e43-8c1f-c1cc081e8deb.txt	1	sGJT	10	native	1	U
0f526e50-3ef8-4e43-8c1f-c1cc081e8deb.txt	1	sGJT	17	native	1	U
0f526e50-3ef8-4e43-8c1f-c1cc081e8deb.txt	1	sGJT	7	native	1	U
0f526e50-3ef8-4e43-8c1f-c1cc081e8deb.txt	0	sGJT	23	native	1	G
0f526e50-3ef8-4e43-8c1f-c1cc081e8deb.txt	0	sGJT	15	native	1	U
0f526e50-3ef8-4e43-8c1f-c1cc081e8deb.txt	1	sGJT	14	native	1	G
10664d5f-17eb-4fd2-babf-f230bec45ea3.txt	1	sGJT	16	classroom	1	U
10664d5f-17eb-4fd2-babf-f230bec45ea3.txt	1	sGJT	37	classroom	1	U
10664d5f-17eb-4fd2-babf-f230bec45ea3.txt	1	sGJT	23	classroom	1	G
10664d5f-17eb-4fd2-babf-f230bec45ea3.txt	1	sGJT	28	classroom	1	U
10664d5f-17eb-4fd2-babf-f230bec45ea3.txt	0	sGJT	20	classroom	1	U
10664d5f-17eb-4fd2-babf-f230bec45ea3.txt	1	sGJT	28	classroom	1	G
10664d5f-17eb-4fd2-babf-f230bec45ea3.txt	1	sGJT	31	classroom	1	G
10664d5f-17eb-4fd2-babf-f230bec45ea3.txt	1	sGJT	18	classroom	1	G
10664d5f-17eb-4fd2-babf-f230bec45ea3.txt	1	sGJT	1	classroom	1	U
10664d5f-17eb-4fd2-babf-f230bec45ea3.txt	1	sGJT	19	classroom	1	G
10664d5f-17eb-4fd2-babf-f230bec45ea3.txt	1	sGJT	26	classroom	1	G
10664d5f-17eb-4fd2-babf-f230bec45ea3.txt	1	sGJT	32	classroom	1	U
10664d5f-17eb-4fd2-babf-f230bec45ea3.txt	1	sGJT	5	classroom	1	G
10664d5f-17eb-4fd2-babf-f230bec45ea3.txt	1	sGJT	21	classroom	1	G
10664d5f-17eb-4fd2-babf-f230bec45ea3.txt	1	sGJT	30	classroom	1	U
10664d5f-17eb-4fd2-babf-f230bec45ea3.txt	1	sGJT	4	classroom	1	U
10664d5f-17eb-4fd2-babf-f230bec45ea3.txt	1	sGJT	9	classroom	1	G
10664d5f-17eb-4fd2-babf-f230bec45ea3.txt	1	sGJT	27	classroom	1	G
10664d5f-17eb-4fd2-babf-f230bec45ea3.txt	1	sGJT	1	classroom	1	G
10664d5f-17eb-4fd2-babf-f230bec45ea3.txt	1	sGJT	24	classroom	1	G
10664d5f-17eb-4fd2-babf-f230bec45ea3.txt	1	sGJT	11	classroom	1	U
10664d5f-17eb-4fd2-babf-f230bec45ea3.txt	1	sGJT	4	classroom	1	G
10664d5f-17eb-4fd2-babf-f230bec45ea3.txt	1	sGJT	17	classroom	1	U
10664d5f-17eb-4fd2-babf-f230bec45ea3.txt	1	sGJT	38	classroom	1	G
10664d5f-17eb-4fd2-babf-f230bec45ea3.txt	1	sGJT	3	classroom	1	G
10664d5f-17eb-4fd2-babf-f230bec45ea3.txt	1	sGJT	6	classroom	1	G
10664d5f-17eb-4fd2-babf-f230bec45ea3.txt	1	sGJT	24	classroom	1	U
10664d5f-17eb-4fd2-babf-f230bec45ea3.txt	1	sGJT	33	classroom	1	U
10664d5f-17eb-4fd2-babf-f230bec45ea3.txt	1	sGJT	11	classroom	1	G
10664d5f-17eb-4fd2-babf-f230bec45ea3.txt	1	sGJT	36	classroom	1	U
10664d5f-17eb-4fd2-babf-f230bec45ea3.txt	1	sGJT	37	classroom	1	G
10664d5f-17eb-4fd2-babf-f230bec45ea3.txt	0	sGJT	14	classroom	1	G
10664d5f-17eb-4fd2-babf-f230bec45ea3.txt	1	sGJT	12	classroom	1	G
10664d5f-17eb-4fd2-babf-f230bec45ea3.txt	1	sGJT	35	classroom	1	G
10664d5f-17eb-4fd2-babf-f230bec45ea3.txt	1	sGJT	32	classroom	1	G
10664d5f-17eb-4fd2-babf-f230bec45ea3.txt	1	sGJT	20	classroom	1	G
10664d5f-17eb-4fd2-babf-f230bec45ea3.txt	1	sGJT	6	classroom	1	U
10664d5f-17eb-4fd2-babf-f230bec45ea3.txt	1	sGJT	5	classroom	1	U
10664d5f-17eb-4fd2-babf-f230bec45ea3.txt	1	sGJT	35	classroom	1	U
10664d5f-17eb-4fd2-babf-f230bec45ea3.txt	1	sGJT	15	classroom	1	G
10664d5f-17eb-4fd2-babf-f230bec45ea3.txt	1	sGJT	25	classroom	1	U
10664d5f-17eb-4fd2-babf-f230bec45ea3.txt	1	sGJT	31	classroom	1	U
10664d5f-17eb-4fd2-babf-f230bec45ea3.txt	1	sGJT	10	classroom	1	U
10664d5f-17eb-4fd2-babf-f230bec45ea3.txt	1	sGJT	17	classroom	1	G
10664d5f-17eb-4fd2-babf-f230bec45ea3.txt	1	sGJT	36	classroom	1	G
10664d5f-17eb-4fd2-babf-f230bec45ea3.txt	1	sGJT	3	classroom	1	U
10664d5f-17eb-4fd2-babf-f230bec45ea3.txt	1	sGJT	33	classroom	1	G
10664d5f-17eb-4fd2-babf-f230bec45ea3.txt	1	sGJT	29	classroom	1	G
10664d5f-17eb-4fd2-babf-f230bec45ea3.txt	1	sGJT	30	classroom	1	G
10664d5f-17eb-4fd2-babf-f230bec45ea3.txt	1	sGJT	34	classroom	1	G
10664d5f-17eb-4fd2-babf-f230bec45ea3.txt	0	sGJT	13	classroom	1	U
10664d5f-17eb-4fd2-babf-f230bec45ea3.txt	1	sGJT	38	classroom	1	U
10664d5f-17eb-4fd2-babf-f230bec45ea3.txt	1	sGJT	22	classroom	1	G
10664d5f-17eb-4fd2-babf-f230bec45ea3.txt	1	sGJT	7	classroom	1	U
10664d5f-17eb-4fd2-babf-f230bec45ea3.txt	1	sGJT	18	classroom	1	U
10664d5f-17eb-4fd2-babf-f230bec45ea3.txt	1	sGJT	39	classroom	1	U
10664d5f-17eb-4fd2-babf-f230bec45ea3.txt	1	sGJT	8	classroom	1	G
10664d5f-17eb-4fd2-babf-f230bec45ea3.txt	0	sGJT	21	classroom	1	U
10664d5f-17eb-4fd2-babf-f230bec45ea3.txt	1	sGJT	14	classroom	1	U
10664d5f-17eb-4fd2-babf-f230bec45ea3.txt	1	sGJT	29	classroom	1	U
10664d5f-17eb-4fd2-babf-f230bec45ea3.txt	1	sGJT	9	classroom	1	U
10664d5f-17eb-4fd2-babf-f230bec45ea3.txt	1	sGJT	27	classroom	1	U
10664d5f-17eb-4fd2-babf-f230bec45ea3.txt	1	sGJT	12	classroom	1	U
10664d5f-17eb-4fd2-babf-f230bec45ea3.txt	1	sGJT	25	classroom	1	G
10664d5f-17eb-4fd2-babf-f230bec45ea3.txt	1	sGJT	2	classroom	1	U
10664d5f-17eb-4fd2-babf-f230bec45ea3.txt	1	sGJT	10	classroom	1	G
10664d5f-17eb-4fd2-babf-f230bec45ea3.txt	1	sGJT	40	classroom	1	G
10664d5f-17eb-4fd2-babf-f230bec45ea3.txt	0	sGJT	19	classroom	1	U
10664d5f-17eb-4fd2-babf-f230bec45ea3.txt	0	sGJT	23	classroom	1	U
10664d5f-17eb-4fd2-babf-f230bec45ea3.txt	1	sGJT	16	classroom	1	G
10664d5f-17eb-4fd2-babf-f230bec45ea3.txt	1	sGJT	40	classroom	1	U
10664d5f-17eb-4fd2-babf-f230bec45ea3.txt	1	sGJT	7	classroom	1	G
10664d5f-17eb-4fd2-babf-f230bec45ea3.txt	1	sGJT	13	classroom	1	G
10664d5f-17eb-4fd2-babf-f230bec45ea3.txt	1	sGJT	34	classroom	1	U
10664d5f-17eb-4fd2-babf-f230bec45ea3.txt	0	sGJT	2	classroom	1	G
10664d5f-17eb-4fd2-babf-f230bec45ea3.txt	0	sGJT	22	classroom	1	U
10664d5f-17eb-4fd2-babf-f230bec45ea3.txt	0	sGJT	26	classroom	1	U
10664d5f-17eb-4fd2-babf-f230bec45ea3.txt	1	sGJT	8	classroom	1	U
10664d5f-17eb-4fd2-babf-f230bec45ea3.txt	1	sGJT	39	classroom	1	G
10f8844a-3df1-4a48-8446-e41690822db9.txt	1	sGJT	32	native	1	U
10f8844a-3df1-4a48-8446-e41690822db9.txt	1	sGJT	10	native	1	U
10f8844a-3df1-4a48-8446-e41690822db9.txt	1	sGJT	30	native	1	U
10f8844a-3df1-4a48-8446-e41690822db9.txt	1	sGJT	11	native	1	G
10f8844a-3df1-4a48-8446-e41690822db9.txt	1	sGJT	12	native	1	G
10f8844a-3df1-4a48-8446-e41690822db9.txt	1	sGJT	23	native	1	U
10f8844a-3df1-4a48-8446-e41690822db9.txt	1	sGJT	35	native	1	U
10f8844a-3df1-4a48-8446-e41690822db9.txt	1	sGJT	24	native	1	U
10f8844a-3df1-4a48-8446-e41690822db9.txt	1	sGJT	12	native	1	U
10f8844a-3df1-4a48-8446-e41690822db9.txt	1	sGJT	7	native	1	G
10f8844a-3df1-4a48-8446-e41690822db9.txt	0	sGJT	23	native	1	G
10f8844a-3df1-4a48-8446-e41690822db9.txt	1	sGJT	9	native	1	G
10f8844a-3df1-4a48-8446-e41690822db9.txt	1	sGJT	21	native	1	G
10f8844a-3df1-4a48-8446-e41690822db9.txt	1	sGJT	37	native	1	U
10f8844a-3df1-4a48-8446-e41690822db9.txt	1	sGJT	6	native	1	U
10f8844a-3df1-4a48-8446-e41690822db9.txt	0	sGJT	20	native	1	U
10f8844a-3df1-4a48-8446-e41690822db9.txt	1	sGJT	25	native	1	U
10f8844a-3df1-4a48-8446-e41690822db9.txt	1	sGJT	22	native	1	U
10f8844a-3df1-4a48-8446-e41690822db9.txt	1	sGJT	26	native	1	G
10f8844a-3df1-4a48-8446-e41690822db9.txt	1	sGJT	27	native	1	U
10f8844a-3df1-4a48-8446-e41690822db9.txt	1	sGJT	2	native	1	U
10f8844a-3df1-4a48-8446-e41690822db9.txt	1	sGJT	31	native	1	G
10f8844a-3df1-4a48-8446-e41690822db9.txt	1	sGJT	40	native	1	U
10f8844a-3df1-4a48-8446-e41690822db9.txt	1	sGJT	35	native	1	G
10f8844a-3df1-4a48-8446-e41690822db9.txt	1	sGJT	39	native	1	U
10f8844a-3df1-4a48-8446-e41690822db9.txt	1	sGJT	28	native	1	U
10f8844a-3df1-4a48-8446-e41690822db9.txt	1	sGJT	13	native	1	G
10f8844a-3df1-4a48-8446-e41690822db9.txt	1	sGJT	1	native	1	G
10f8844a-3df1-4a48-8446-e41690822db9.txt	1	sGJT	15	native	1	G
10f8844a-3df1-4a48-8446-e41690822db9.txt	1	sGJT	25	native	1	G
10f8844a-3df1-4a48-8446-e41690822db9.txt	1	sGJT	17	native	1	U
10f8844a-3df1-4a48-8446-e41690822db9.txt	1	sGJT	1	native	1	U
10f8844a-3df1-4a48-8446-e41690822db9.txt	1	sGJT	38	native	1	U
10f8844a-3df1-4a48-8446-e41690822db9.txt	1	sGJT	34	native	1	U
10f8844a-3df1-4a48-8446-e41690822db9.txt	1	sGJT	29	native	1	U
10f8844a-3df1-4a48-8446-e41690822db9.txt	1	sGJT	9	native	1	U
10f8844a-3df1-4a48-8446-e41690822db9.txt	1	sGJT	32	native	1	G
10f8844a-3df1-4a48-8446-e41690822db9.txt	1	sGJT	5	native	1	U
10f8844a-3df1-4a48-8446-e41690822db9.txt	1	sGJT	4	native	1	G
10f8844a-3df1-4a48-8446-e41690822db9.txt	1	sGJT	22	native	1	G
10f8844a-3df1-4a48-8446-e41690822db9.txt	1	sGJT	11	native	1	U
10f8844a-3df1-4a48-8446-e41690822db9.txt	1	sGJT	10	native	1	G
10f8844a-3df1-4a48-8446-e41690822db9.txt	1	sGJT	17	native	1	G
10f8844a-3df1-4a48-8446-e41690822db9.txt	1	sGJT	27	native	1	G
10f8844a-3df1-4a48-8446-e41690822db9.txt	1	sGJT	16	native	1	G
10f8844a-3df1-4a48-8446-e41690822db9.txt	0	sGJT	36	native	1	U
10f8844a-3df1-4a48-8446-e41690822db9.txt	1	sGJT	28	native	1	G
10f8844a-3df1-4a48-8446-e41690822db9.txt	1	sGJT	18	native	1	U
10f8844a-3df1-4a48-8446-e41690822db9.txt	1	sGJT	14	native	1	G
10f8844a-3df1-4a48-8446-e41690822db9.txt	1	sGJT	14	native	1	U
10f8844a-3df1-4a48-8446-e41690822db9.txt	1	sGJT	39	native	1	G
10f8844a-3df1-4a48-8446-e41690822db9.txt	1	sGJT	19	native	1	G
10f8844a-3df1-4a48-8446-e41690822db9.txt	1	sGJT	33	native	1	U
10f8844a-3df1-4a48-8446-e41690822db9.txt	0	sGJT	15	native	1	U
10f8844a-3df1-4a48-8446-e41690822db9.txt	1	sGJT	33	native	1	G
10f8844a-3df1-4a48-8446-e41690822db9.txt	1	sGJT	8	native	1	G
10f8844a-3df1-4a48-8446-e41690822db9.txt	1	sGJT	13	native	1	U
10f8844a-3df1-4a48-8446-e41690822db9.txt	1	sGJT	21	native	1	U
10f8844a-3df1-4a48-8446-e41690822db9.txt	1	sGJT	38	native	1	G
10f8844a-3df1-4a48-8446-e41690822db9.txt	1	sGJT	8	native	1	U
10f8844a-3df1-4a48-8446-e41690822db9.txt	1	sGJT	3	native	1	G
10f8844a-3df1-4a48-8446-e41690822db9.txt	0	sGJT	16	native	1	U
10f8844a-3df1-4a48-8446-e41690822db9.txt	1	sGJT	4	native	1	U
10f8844a-3df1-4a48-8446-e41690822db9.txt	1	sGJT	40	native	1	G
10f8844a-3df1-4a48-8446-e41690822db9.txt	1	sGJT	37	native	1	G
10f8844a-3df1-4a48-8446-e41690822db9.txt	1	sGJT	7	native	1	U
10f8844a-3df1-4a48-8446-e41690822db9.txt	1	sGJT	34	native	1	G
10f8844a-3df1-4a48-8446-e41690822db9.txt	1	sGJT	5	native	1	G
10f8844a-3df1-4a48-8446-e41690822db9.txt	1	sGJT	36	native	1	G
10f8844a-3df1-4a48-8446-e41690822db9.txt	1	sGJT	30	native	1	G
10f8844a-3df1-4a48-8446-e41690822db9.txt	1	sGJT	6	native	1	G
10f8844a-3df1-4a48-8446-e41690822db9.txt	1	sGJT	20	native	1	G
10f8844a-3df1-4a48-8446-e41690822db9.txt	1	sGJT	3	native	1	U
10f8844a-3df1-4a48-8446-e41690822db9.txt	1	sGJT	29	native	1	G
10f8844a-3df1-4a48-8446-e41690822db9.txt	1	sGJT	18	native	1	G
10f8844a-3df1-4a48-8446-e41690822db9.txt	1	sGJT	2	native	1	G
10f8844a-3df1-4a48-8446-e41690822db9.txt	1	sGJT	24	native	1	G
10f8844a-3df1-4a48-8446-e41690822db9.txt	1	sGJT	26	native	1	U
10f8844a-3df1-4a48-8446-e41690822db9.txt	1	sGJT	19	native	1	U
10f8844a-3df1-4a48-8446-e41690822db9.txt	1	sGJT	31	native	1	U
1484b2a6-5fd9-49c5-865e-28ff2eab720c.txt	0	sGJT	27	classroom	1	G
1484b2a6-5fd9-49c5-865e-28ff2eab720c.txt	0	sGJT	23	classroom	1	G
1484b2a6-5fd9-49c5-865e-28ff2eab720c.txt	1	sGJT	4	classroom	1	G
1484b2a6-5fd9-49c5-865e-28ff2eab720c.txt	0	sGJT	28	classroom	1	G
1484b2a6-5fd9-49c5-865e-28ff2eab720c.txt	0	sGJT	22	classroom	1	G
1484b2a6-5fd9-49c5-865e-28ff2eab720c.txt	0	sGJT	33	classroom	1	U
1484b2a6-5fd9-49c5-865e-28ff2eab720c.txt	1	sGJT	36	classroom	1	U
1484b2a6-5fd9-49c5-865e-28ff2eab720c.txt	1	sGJT	37	classroom	1	G
1484b2a6-5fd9-49c5-865e-28ff2eab720c.txt	1	sGJT	31	classroom	1	U
1484b2a6-5fd9-49c5-865e-28ff2eab720c.txt	0	sGJT	16	classroom	1	U
1484b2a6-5fd9-49c5-865e-28ff2eab720c.txt	1	sGJT	34	classroom	1	G
1484b2a6-5fd9-49c5-865e-28ff2eab720c.txt	1	sGJT	11	classroom	1	U
1484b2a6-5fd9-49c5-865e-28ff2eab720c.txt	0	sGJT	1	classroom	1	U
1484b2a6-5fd9-49c5-865e-28ff2eab720c.txt	1	sGJT	13	classroom	1	G
1484b2a6-5fd9-49c5-865e-28ff2eab720c.txt	0	sGJT	12	classroom	1	U
1484b2a6-5fd9-49c5-865e-28ff2eab720c.txt	1	sGJT	39	classroom	1	G
1484b2a6-5fd9-49c5-865e-28ff2eab720c.txt	0	sGJT	34	classroom	1	U
1484b2a6-5fd9-49c5-865e-28ff2eab720c.txt	0	sGJT	21	classroom	1	G
1484b2a6-5fd9-49c5-865e-28ff2eab720c.txt	1	sGJT	4	classroom	1	U
1484b2a6-5fd9-49c5-865e-28ff2eab720c.txt	1	sGJT	10	classroom	1	G
1484b2a6-5fd9-49c5-865e-28ff2eab720c.txt	1	sGJT	40	classroom	1	G
1484b2a6-5fd9-49c5-865e-28ff2eab720c.txt	0	sGJT	15	classroom	1	G
1484b2a6-5fd9-49c5-865e-28ff2eab720c.txt	1	sGJT	32	classroom	1	G
1484b2a6-5fd9-49c5-865e-28ff2eab720c.txt	1	sGJT	30	classroom	1	G
1484b2a6-5fd9-49c5-865e-28ff2eab720c.txt	0	sGJT	40	classroom	1	U
1484b2a6-5fd9-49c5-865e-28ff2eab720c.txt	0	sGJT	35	classroom	1	U
1484b2a6-5fd9-49c5-865e-28ff2eab720c.txt	1	sGJT	29	classroom	1	U
1484b2a6-5fd9-49c5-865e-28ff2eab720c.txt	0	sGJT	30	classroom	1	U
1484b2a6-5fd9-49c5-865e-28ff2eab720c.txt	0	sGJT	26	classroom	1	G
1484b2a6-5fd9-49c5-865e-28ff2eab720c.txt	0	sGJT	5	classroom	1	G
1484b2a6-5fd9-49c5-865e-28ff2eab720c.txt	0	sGJT	10	classroom	1	U
1484b2a6-5fd9-49c5-865e-28ff2eab720c.txt	0	sGJT	6	classroom	1	U
1484b2a6-5fd9-49c5-865e-28ff2eab720c.txt	1	sGJT	6	classroom	1	G
1484b2a6-5fd9-49c5-865e-28ff2eab720c.txt	0	sGJT	8	classroom	1	U
1484b2a6-5fd9-49c5-865e-28ff2eab720c.txt	1	sGJT	24	classroom	1	U
1484b2a6-5fd9-49c5-865e-28ff2eab720c.txt	1	sGJT	19	classroom	1	U
1484b2a6-5fd9-49c5-865e-28ff2eab720c.txt	1	sGJT	2	classroom	1	G
1484b2a6-5fd9-49c5-865e-28ff2eab720c.txt	0	sGJT	19	classroom	1	G
1484b2a6-5fd9-49c5-865e-28ff2eab720c.txt	0	sGJT	2	classroom	1	U
1484b2a6-5fd9-49c5-865e-28ff2eab720c.txt	1	sGJT	22	classroom	1	U
1484b2a6-5fd9-49c5-865e-28ff2eab720c.txt	0	sGJT	24	classroom	1	G
1484b2a6-5fd9-49c5-865e-28ff2eab720c.txt	1	sGJT	3	classroom	1	G
1484b2a6-5fd9-49c5-865e-28ff2eab720c.txt	0	sGJT	3	classroom	1	U
1484b2a6-5fd9-49c5-865e-28ff2eab720c.txt	1	sGJT	7	classroom	1	G
1484b2a6-5fd9-49c5-865e-28ff2eab720c.txt	0	sGJT	21	classroom	1	U
1484b2a6-5fd9-49c5-865e-28ff2eab720c.txt	1	sGJT	14	classroom	1	G
1484b2a6-5fd9-49c5-865e-28ff2eab720c.txt	1	sGJT	17	classroom	1	G
1484b2a6-5fd9-49c5-865e-28ff2eab720c.txt	0	sGJT	27	classroom	1	U
1484b2a6-5fd9-49c5-865e-28ff2eab720c.txt	0	sGJT	18	classroom	1	U
1484b2a6-5fd9-49c5-865e-28ff2eab720c.txt	1	sGJT	25	classroom	1	G
1484b2a6-5fd9-49c5-865e-28ff2eab720c.txt	1	sGJT	9	classroom	1	G
1484b2a6-5fd9-49c5-865e-28ff2eab720c.txt	1	sGJT	38	classroom	1	G
1484b2a6-5fd9-49c5-865e-28ff2eab720c.txt	0	sGJT	36	classroom	1	G
1484b2a6-5fd9-49c5-865e-28ff2eab720c.txt	0	sGJT	9	classroom	1	U
1484b2a6-5fd9-49c5-865e-28ff2eab720c.txt	0	sGJT	14	classroom	1	U
1484b2a6-5fd9-49c5-865e-28ff2eab720c.txt	1	sGJT	33	classroom	1	G
1484b2a6-5fd9-49c5-865e-28ff2eab720c.txt	1	sGJT	29	classroom	1	G
1484b2a6-5fd9-49c5-865e-28ff2eab720c.txt	0	sGJT	20	classroom	1	U
1484b2a6-5fd9-49c5-865e-28ff2eab720c.txt	1	sGJT	11	classroom	1	G
1484b2a6-5fd9-49c5-865e-28ff2eab720c.txt	0	sGJT	26	classroom	1	U
1484b2a6-5fd9-49c5-865e-28ff2eab720c.txt	1	sGJT	5	classroom	1	U
1484b2a6-5fd9-49c5-865e-28ff2eab720c.txt	0	sGJT	20	classroom	1	G
1484b2a6-5fd9-49c5-865e-28ff2eab720c.txt	0	sGJT	13	classroom	1	U
1484b2a6-5fd9-49c5-865e-28ff2eab720c.txt	1	sGJT	25	classroom	1	U
1484b2a6-5fd9-49c5-865e-28ff2eab720c.txt	0	sGJT	15	classroom	1	U
1484b2a6-5fd9-49c5-865e-28ff2eab720c.txt	0	sGJT	35	classroom	1	G
1484b2a6-5fd9-49c5-865e-28ff2eab720c.txt	1	sGJT	32	classroom	1	U
1484b2a6-5fd9-49c5-865e-28ff2eab720c.txt	1	sGJT	8	classroom	1	G
1484b2a6-5fd9-49c5-865e-28ff2eab720c.txt	0	sGJT	17	classroom	1	U
1484b2a6-5fd9-49c5-865e-28ff2eab720c.txt	1	sGJT	16	classroom	1	G
1484b2a6-5fd9-49c5-865e-28ff2eab720c.txt	0	sGJT	37	classroom	1	U
1484b2a6-5fd9-49c5-865e-28ff2eab720c.txt	1	sGJT	31	classroom	1	G
1484b2a6-5fd9-49c5-865e-28ff2eab720c.txt	1	sGJT	1	classroom	1	G
1484b2a6-5fd9-49c5-865e-28ff2eab720c.txt	1	sGJT	18	classroom	1	G
1484b2a6-5fd9-49c5-865e-28ff2eab720c.txt	1	sGJT	12	classroom	1	G
1484b2a6-5fd9-49c5-865e-28ff2eab720c.txt	1	sGJT	39	classroom	1	U
1484b2a6-5fd9-49c5-865e-28ff2eab720c.txt	1	sGJT	23	classroom	1	U
1484b2a6-5fd9-49c5-865e-28ff2eab720c.txt	0	sGJT	7	classroom	1	U
1484b2a6-5fd9-49c5-865e-28ff2eab720c.txt	0	sGJT	28	classroom	1	U
159a7f2e-dd6c-4288-827e-aadf0f7b3567.txt	1	sGJT	15	classroom	1	G
159a7f2e-dd6c-4288-827e-aadf0f7b3567.txt	1	sGJT	22	classroom	1	G
159a7f2e-dd6c-4288-827e-aadf0f7b3567.txt	1	sGJT	7	classroom	1	G
159a7f2e-dd6c-4288-827e-aadf0f7b3567.txt	1	sGJT	13	classroom	1	G
159a7f2e-dd6c-4288-827e-aadf0f7b3567.txt	1	sGJT	2	classroom	1	U
159a7f2e-dd6c-4288-827e-aadf0f7b3567.txt	1	sGJT	21	classroom	1	U
159a7f2e-dd6c-4288-827e-aadf0f7b3567.txt	0	sGJT	29	classroom	1	U
159a7f2e-dd6c-4288-827e-aadf0f7b3567.txt	1	sGJT	26	classroom	1	U
159a7f2e-dd6c-4288-827e-aadf0f7b3567.txt	1	sGJT	27	classroom	1	G
159a7f2e-dd6c-4288-827e-aadf0f7b3567.txt	1	sGJT	32	classroom	1	G
159a7f2e-dd6c-4288-827e-aadf0f7b3567.txt	0	sGJT	21	classroom	1	G
159a7f2e-dd6c-4288-827e-aadf0f7b3567.txt	0	sGJT	20	classroom	1	U
159a7f2e-dd6c-4288-827e-aadf0f7b3567.txt	1	sGJT	25	classroom	1	U
159a7f2e-dd6c-4288-827e-aadf0f7b3567.txt	1	sGJT	6	classroom	1	G
159a7f2e-dd6c-4288-827e-aadf0f7b3567.txt	1	sGJT	19	classroom	1	G
159a7f2e-dd6c-4288-827e-aadf0f7b3567.txt	1	sGJT	34	classroom	1	G
159a7f2e-dd6c-4288-827e-aadf0f7b3567.txt	0	sGJT	14	classroom	1	U
159a7f2e-dd6c-4288-827e-aadf0f7b3567.txt	0	sGJT	5	classroom	1	U
159a7f2e-dd6c-4288-827e-aadf0f7b3567.txt	1	sGJT	22	classroom	1	U
159a7f2e-dd6c-4288-827e-aadf0f7b3567.txt	1	sGJT	2	classroom	1	G
159a7f2e-dd6c-4288-827e-aadf0f7b3567.txt	1	sGJT	30	classroom	1	G
159a7f2e-dd6c-4288-827e-aadf0f7b3567.txt	1	sGJT	36	classroom	1	U
159a7f2e-dd6c-4288-827e-aadf0f7b3567.txt	1	sGJT	31	classroom	1	G
159a7f2e-dd6c-4288-827e-aadf0f7b3567.txt	1	sGJT	11	classroom	1	G
159a7f2e-dd6c-4288-827e-aadf0f7b3567.txt	1	sGJT	10	classroom	1	U
159a7f2e-dd6c-4288-827e-aadf0f7b3567.txt	1	sGJT	38	classroom	1	G
159a7f2e-dd6c-4288-827e-aadf0f7b3567.txt	1	sGJT	23	classroom	1	U
159a7f2e-dd6c-4288-827e-aadf0f7b3567.txt	0	sGJT	26	classroom	1	G
159a7f2e-dd6c-4288-827e-aadf0f7b3567.txt	1	sGJT	4	classroom	1	G
159a7f2e-dd6c-4288-827e-aadf0f7b3567.txt	1	sGJT	29	classroom	1	G
159a7f2e-dd6c-4288-827e-aadf0f7b3567.txt	1	sGJT	17	classroom	1	G
159a7f2e-dd6c-4288-827e-aadf0f7b3567.txt	1	sGJT	35	classroom	1	G
159a7f2e-dd6c-4288-827e-aadf0f7b3567.txt	1	sGJT	1	classroom	1	G
159a7f2e-dd6c-4288-827e-aadf0f7b3567.txt	1	sGJT	37	classroom	1	G
159a7f2e-dd6c-4288-827e-aadf0f7b3567.txt	1	sGJT	33	classroom	1	G
159a7f2e-dd6c-4288-827e-aadf0f7b3567.txt	1	sGJT	9	classroom	1	G
159a7f2e-dd6c-4288-827e-aadf0f7b3567.txt	1	sGJT	24	classroom	1	U
159a7f2e-dd6c-4288-827e-aadf0f7b3567.txt	1	sGJT	18	classroom	1	G
159a7f2e-dd6c-4288-827e-aadf0f7b3567.txt	0	sGJT	16	classroom	1	U
159a7f2e-dd6c-4288-827e-aadf0f7b3567.txt	0	sGJT	6	classroom	1	U
159a7f2e-dd6c-4288-827e-aadf0f7b3567.txt	1	sGJT	24	classroom	1	G
159a7f2e-dd6c-4288-827e-aadf0f7b3567.txt	0	sGJT	33	classroom	1	U
159a7f2e-dd6c-4288-827e-aadf0f7b3567.txt	1	sGJT	27	classroom	1	U
159a7f2e-dd6c-4288-827e-aadf0f7b3567.txt	0	sGJT	20	classroom	1	G
159a7f2e-dd6c-4288-827e-aadf0f7b3567.txt	1	sGJT	11	classroom	1	U
159a7f2e-dd6c-4288-827e-aadf0f7b3567.txt	0	sGJT	16	classroom	1	G
159a7f2e-dd6c-4288-827e-aadf0f7b3567.txt	0	sGJT	35	classroom	1	U
159a7f2e-dd6c-4288-827e-aadf0f7b3567.txt	1	sGJT	18	classroom	1	U
159a7f2e-dd6c-4288-827e-aadf0f7b3567.txt	1	sGJT	39	classroom	1	G
159a7f2e-dd6c-4288-827e-aadf0f7b3567.txt	0	sGJT	13	classroom	1	U
159a7f2e-dd6c-4288-827e-aadf0f7b3567.txt	0	sGJT	40	classroom	1	G
159a7f2e-dd6c-4288-827e-aadf0f7b3567.txt	0	sGJT	36	classroom	1	G
159a7f2e-dd6c-4288-827e-aadf0f7b3567.txt	1	sGJT	10	classroom	1	G
159a7f2e-dd6c-4288-827e-aadf0f7b3567.txt	1	sGJT	34	classroom	1	U
159a7f2e-dd6c-4288-827e-aadf0f7b3567.txt	1	sGJT	25	classroom	1	G
159a7f2e-dd6c-4288-827e-aadf0f7b3567.txt	0	sGJT	23	classroom	1	G
159a7f2e-dd6c-4288-827e-aadf0f7b3567.txt	1	sGJT	1	classroom	1	U
159a7f2e-dd6c-4288-827e-aadf0f7b3567.txt	1	sGJT	8	classroom	1	U
159a7f2e-dd6c-4288-827e-aadf0f7b3567.txt	1	sGJT	7	classroom	1	U
159a7f2e-dd6c-4288-827e-aadf0f7b3567.txt	1	sGJT	9	classroom	1	U
159a7f2e-dd6c-4288-827e-aadf0f7b3567.txt	1	sGJT	31	classroom	1	U
159a7f2e-dd6c-4288-827e-aadf0f7b3567.txt	0	sGJT	8	classroom	1	G
159a7f2e-dd6c-4288-827e-aadf0f7b3567.txt	1	sGJT	32	classroom	1	U
159a7f2e-dd6c-4288-827e-aadf0f7b3567.txt	1	sGJT	17	classroom	1	U
159a7f2e-dd6c-4288-827e-aadf0f7b3567.txt	1	sGJT	19	classroom	1	U
159a7f2e-dd6c-4288-827e-aadf0f7b3567.txt	0	sGJT	28	classroom	1	U
159a7f2e-dd6c-4288-827e-aadf0f7b3567.txt	1	sGJT	3	classroom	1	U
159a7f2e-dd6c-4288-827e-aadf0f7b3567.txt	1	sGJT	28	classroom	1	G
159a7f2e-dd6c-4288-827e-aadf0f7b3567.txt	1	sGJT	4	classroom	1	U
159a7f2e-dd6c-4288-827e-aadf0f7b3567.txt	1	sGJT	37	classroom	1	U
159a7f2e-dd6c-4288-827e-aadf0f7b3567.txt	1	sGJT	38	classroom	1	U
159a7f2e-dd6c-4288-827e-aadf0f7b3567.txt	1	sGJT	12	classroom	1	G
159a7f2e-dd6c-4288-827e-aadf0f7b3567.txt	1	sGJT	14	classroom	1	G
159a7f2e-dd6c-4288-827e-aadf0f7b3567.txt	0	sGJT	40	classroom	1	U
159a7f2e-dd6c-4288-827e-aadf0f7b3567.txt	1	sGJT	5	classroom	1	G
159a7f2e-dd6c-4288-827e-aadf0f7b3567.txt	0	sGJT	12	classroom	1	U
159a7f2e-dd6c-4288-827e-aadf0f7b3567.txt	1	sGJT	15	classroom	1	U
159a7f2e-dd6c-4288-827e-aadf0f7b3567.txt	1	sGJT	39	classroom	1	U
159a7f2e-dd6c-4288-827e-aadf0f7b3567.txt	1	sGJT	30	classroom	1	U
159a7f2e-dd6c-4288-827e-aadf0f7b3567.txt	1	sGJT	3	classroom	1	G
182675ba-faaa-4e24-9eb5-3e8daae0fa9d.txt	1	sGJT	3	immersion	1	G
182675ba-faaa-4e24-9eb5-3e8daae0fa9d.txt	1	sGJT	1	immersion	1	G
182675ba-faaa-4e24-9eb5-3e8daae0fa9d.txt	1	sGJT	20	immersion	1	U
182675ba-faaa-4e24-9eb5-3e8daae0fa9d.txt	1	sGJT	8	immersion	1	U
182675ba-faaa-4e24-9eb5-3e8daae0fa9d.txt	1	sGJT	24	immersion	1	G
182675ba-faaa-4e24-9eb5-3e8daae0fa9d.txt	1	sGJT	23	immersion	1	U
182675ba-faaa-4e24-9eb5-3e8daae0fa9d.txt	1	sGJT	25	immersion	1	U
182675ba-faaa-4e24-9eb5-3e8daae0fa9d.txt	1	sGJT	35	immersion	1	U
182675ba-faaa-4e24-9eb5-3e8daae0fa9d.txt	1	sGJT	11	immersion	1	U
182675ba-faaa-4e24-9eb5-3e8daae0fa9d.txt	1	sGJT	38	immersion	1	U
182675ba-faaa-4e24-9eb5-3e8daae0fa9d.txt	1	sGJT	4	immersion	1	U
182675ba-faaa-4e24-9eb5-3e8daae0fa9d.txt	1	sGJT	21	immersion	1	G
182675ba-faaa-4e24-9eb5-3e8daae0fa9d.txt	1	sGJT	39	immersion	1	G
182675ba-faaa-4e24-9eb5-3e8daae0fa9d.txt	1	sGJT	12	immersion	1	G
182675ba-faaa-4e24-9eb5-3e8daae0fa9d.txt	1	sGJT	6	immersion	1	U
182675ba-faaa-4e24-9eb5-3e8daae0fa9d.txt	1	sGJT	8	immersion	1	G
182675ba-faaa-4e24-9eb5-3e8daae0fa9d.txt	1	sGJT	27	immersion	1	U
182675ba-faaa-4e24-9eb5-3e8daae0fa9d.txt	1	sGJT	5	immersion	1	G
182675ba-faaa-4e24-9eb5-3e8daae0fa9d.txt	1	sGJT	17	immersion	1	U
182675ba-faaa-4e24-9eb5-3e8daae0fa9d.txt	1	sGJT	36	immersion	1	U
182675ba-faaa-4e24-9eb5-3e8daae0fa9d.txt	1	sGJT	10	immersion	1	U
182675ba-faaa-4e24-9eb5-3e8daae0fa9d.txt	1	sGJT	37	immersion	1	G
182675ba-faaa-4e24-9eb5-3e8daae0fa9d.txt	1	sGJT	16	immersion	1	U
182675ba-faaa-4e24-9eb5-3e8daae0fa9d.txt	1	sGJT	32	immersion	1	U
182675ba-faaa-4e24-9eb5-3e8daae0fa9d.txt	1	sGJT	18	immersion	1	G
182675ba-faaa-4e24-9eb5-3e8daae0fa9d.txt	1	sGJT	3	immersion	1	U
182675ba-faaa-4e24-9eb5-3e8daae0fa9d.txt	1	sGJT	28	immersion	1	U
182675ba-faaa-4e24-9eb5-3e8daae0fa9d.txt	1	sGJT	14	immersion	1	U
182675ba-faaa-4e24-9eb5-3e8daae0fa9d.txt	1	sGJT	13	immersion	1	U
182675ba-faaa-4e24-9eb5-3e8daae0fa9d.txt	1	sGJT	28	immersion	1	G
182675ba-faaa-4e24-9eb5-3e8daae0fa9d.txt	1	sGJT	31	immersion	1	U
182675ba-faaa-4e24-9eb5-3e8daae0fa9d.txt	0	sGJT	40	immersion	1	U
182675ba-faaa-4e24-9eb5-3e8daae0fa9d.txt	1	sGJT	17	immersion	1	G
182675ba-faaa-4e24-9eb5-3e8daae0fa9d.txt	1	sGJT	29	immersion	1	U
182675ba-faaa-4e24-9eb5-3e8daae0fa9d.txt	1	sGJT	38	immersion	1	G
182675ba-faaa-4e24-9eb5-3e8daae0fa9d.txt	0	sGJT	26	immersion	1	G
182675ba-faaa-4e24-9eb5-3e8daae0fa9d.txt	1	sGJT	9	immersion	1	U
182675ba-faaa-4e24-9eb5-3e8daae0fa9d.txt	1	sGJT	7	immersion	1	G
182675ba-faaa-4e24-9eb5-3e8daae0fa9d.txt	1	sGJT	40	immersion	1	G
182675ba-faaa-4e24-9eb5-3e8daae0fa9d.txt	0	sGJT	36	immersion	1	G
182675ba-faaa-4e24-9eb5-3e8daae0fa9d.txt	1	sGJT	14	immersion	1	G
182675ba-faaa-4e24-9eb5-3e8daae0fa9d.txt	1	sGJT	15	immersion	1	U
182675ba-faaa-4e24-9eb5-3e8daae0fa9d.txt	1	sGJT	20	immersion	1	G
182675ba-faaa-4e24-9eb5-3e8daae0fa9d.txt	1	sGJT	2	immersion	1	G
182675ba-faaa-4e24-9eb5-3e8daae0fa9d.txt	1	sGJT	11	immersion	1	G
182675ba-faaa-4e24-9eb5-3e8daae0fa9d.txt	1	sGJT	19	immersion	1	U
182675ba-faaa-4e24-9eb5-3e8daae0fa9d.txt	1	sGJT	22	immersion	1	G
182675ba-faaa-4e24-9eb5-3e8daae0fa9d.txt	0	sGJT	2	immersion	1	U
182675ba-faaa-4e24-9eb5-3e8daae0fa9d.txt	1	sGJT	5	immersion	1	U
182675ba-faaa-4e24-9eb5-3e8daae0fa9d.txt	1	sGJT	12	immersion	1	U
182675ba-faaa-4e24-9eb5-3e8daae0fa9d.txt	1	sGJT	34	immersion	1	U
182675ba-faaa-4e24-9eb5-3e8daae0fa9d.txt	1	sGJT	15	immersion	1	G
182675ba-faaa-4e24-9eb5-3e8daae0fa9d.txt	1	sGJT	19	immersion	1	G
182675ba-faaa-4e24-9eb5-3e8daae0fa9d.txt	1	sGJT	32	immersion	1	G
182675ba-faaa-4e24-9eb5-3e8daae0fa9d.txt	1	sGJT	7	immersion	1	U
182675ba-faaa-4e24-9eb5-3e8daae0fa9d.txt	1	sGJT	39	immersion	1	U
182675ba-faaa-4e24-9eb5-3e8daae0fa9d.txt	1	sGJT	24	immersion	1	U
182675ba-faaa-4e24-9eb5-3e8daae0fa9d.txt	1	sGJT	1	immersion	1	U
182675ba-faaa-4e24-9eb5-3e8daae0fa9d.txt	1	sGJT	34	immersion	1	G
182675ba-faaa-4e24-9eb5-3e8daae0fa9d.txt	1	sGJT	16	immersion	1	G
182675ba-faaa-4e24-9eb5-3e8daae0fa9d.txt	0	sGJT	22	immersion	1	U
182675ba-faaa-4e24-9eb5-3e8daae0fa9d.txt	1	sGJT	4	immersion	1	G
182675ba-faaa-4e24-9eb5-3e8daae0fa9d.txt	1	sGJT	33	immersion	1	U
182675ba-faaa-4e24-9eb5-3e8daae0fa9d.txt	1	sGJT	26	immersion	1	U
182675ba-faaa-4e24-9eb5-3e8daae0fa9d.txt	1	sGJT	27	immersion	1	G
182675ba-faaa-4e24-9eb5-3e8daae0fa9d.txt	1	sGJT	30	immersion	1	G
182675ba-faaa-4e24-9eb5-3e8daae0fa9d.txt	1	sGJT	25	immersion	1	G
182675ba-faaa-4e24-9eb5-3e8daae0fa9d.txt	1	sGJT	23	immersion	1	G
182675ba-faaa-4e24-9eb5-3e8daae0fa9d.txt	1	sGJT	18	immersion	1	U
182675ba-faaa-4e24-9eb5-3e8daae0fa9d.txt	1	sGJT	21	immersion	1	U
182675ba-faaa-4e24-9eb5-3e8daae0fa9d.txt	1	sGJT	33	immersion	1	G
182675ba-faaa-4e24-9eb5-3e8daae0fa9d.txt	1	sGJT	13	immersion	1	G
182675ba-faaa-4e24-9eb5-3e8daae0fa9d.txt	1	sGJT	30	immersion	1	U
182675ba-faaa-4e24-9eb5-3e8daae0fa9d.txt	1	sGJT	35	immersion	1	G
182675ba-faaa-4e24-9eb5-3e8daae0fa9d.txt	1	sGJT	6	immersion	1	G
182675ba-faaa-4e24-9eb5-3e8daae0fa9d.txt	1	sGJT	9	immersion	1	G
182675ba-faaa-4e24-9eb5-3e8daae0fa9d.txt	1	sGJT	37	immersion	1	U
182675ba-faaa-4e24-9eb5-3e8daae0fa9d.txt	1	sGJT	10	immersion	1	G
182675ba-faaa-4e24-9eb5-3e8daae0fa9d.txt	1	sGJT	31	immersion	1	G
182675ba-faaa-4e24-9eb5-3e8daae0fa9d.txt	1	sGJT	29	immersion	1	G
1aac51e2-89e2-4bf7-a782-5bb443502996.txt	1	sGJT	11	native	1	G
1aac51e2-89e2-4bf7-a782-5bb443502996.txt	1	sGJT	27	native	1	U
1aac51e2-89e2-4bf7-a782-5bb443502996.txt	1	sGJT	12	native	1	U
1aac51e2-89e2-4bf7-a782-5bb443502996.txt	1	sGJT	13	native	1	G
1aac51e2-89e2-4bf7-a782-5bb443502996.txt	1	sGJT	38	native	1	G
1aac51e2-89e2-4bf7-a782-5bb443502996.txt	1	sGJT	25	native	1	U
1aac51e2-89e2-4bf7-a782-5bb443502996.txt	1	sGJT	28	native	1	U
1aac51e2-89e2-4bf7-a782-5bb443502996.txt	1	sGJT	33	native	1	U
1aac51e2-89e2-4bf7-a782-5bb443502996.txt	1	sGJT	16	native	1	U
1aac51e2-89e2-4bf7-a782-5bb443502996.txt	0	sGJT	15	native	1	U
1aac51e2-89e2-4bf7-a782-5bb443502996.txt	1	sGJT	3	native	1	U
1aac51e2-89e2-4bf7-a782-5bb443502996.txt	1	sGJT	37	native	1	G
1aac51e2-89e2-4bf7-a782-5bb443502996.txt	1	sGJT	19	native	1	U
1aac51e2-89e2-4bf7-a782-5bb443502996.txt	1	sGJT	32	native	1	G
1aac51e2-89e2-4bf7-a782-5bb443502996.txt	1	sGJT	36	native	1	U
1aac51e2-89e2-4bf7-a782-5bb443502996.txt	1	sGJT	8	native	1	U
1aac51e2-89e2-4bf7-a782-5bb443502996.txt	1	sGJT	21	native	1	G
1aac51e2-89e2-4bf7-a782-5bb443502996.txt	1	sGJT	15	native	1	G
1aac51e2-89e2-4bf7-a782-5bb443502996.txt	1	sGJT	23	native	1	U
1aac51e2-89e2-4bf7-a782-5bb443502996.txt	1	sGJT	38	native	1	U
1aac51e2-89e2-4bf7-a782-5bb443502996.txt	1	sGJT	31	native	1	G
1aac51e2-89e2-4bf7-a782-5bb443502996.txt	1	sGJT	19	native	1	G
1aac51e2-89e2-4bf7-a782-5bb443502996.txt	1	sGJT	20	native	1	G
1aac51e2-89e2-4bf7-a782-5bb443502996.txt	1	sGJT	14	native	1	U
1aac51e2-89e2-4bf7-a782-5bb443502996.txt	1	sGJT	35	native	1	G
1aac51e2-89e2-4bf7-a782-5bb443502996.txt	1	sGJT	10	native	1	U
1aac51e2-89e2-4bf7-a782-5bb443502996.txt	1	sGJT	17	native	1	U
1aac51e2-89e2-4bf7-a782-5bb443502996.txt	1	sGJT	11	native	1	U
1aac51e2-89e2-4bf7-a782-5bb443502996.txt	1	sGJT	4	native	1	G
1aac51e2-89e2-4bf7-a782-5bb443502996.txt	1	sGJT	4	native	1	U
1aac51e2-89e2-4bf7-a782-5bb443502996.txt	1	sGJT	40	native	1	G
1aac51e2-89e2-4bf7-a782-5bb443502996.txt	1	sGJT	3	native	1	G
1aac51e2-89e2-4bf7-a782-5bb443502996.txt	1	sGJT	39	native	1	U
1aac51e2-89e2-4bf7-a782-5bb443502996.txt	1	sGJT	39	native	1	G
1aac51e2-89e2-4bf7-a782-5bb443502996.txt	1	sGJT	1	native	1	G
1aac51e2-89e2-4bf7-a782-5bb443502996.txt	1	sGJT	22	native	1	U
1aac51e2-89e2-4bf7-a782-5bb443502996.txt	1	sGJT	23	native	1	G
1aac51e2-89e2-4bf7-a782-5bb443502996.txt	1	sGJT	7	native	1	G
1aac51e2-89e2-4bf7-a782-5bb443502996.txt	1	sGJT	9	native	1	U
1aac51e2-89e2-4bf7-a782-5bb443502996.txt	1	sGJT	26	native	1	U
1aac51e2-89e2-4bf7-a782-5bb443502996.txt	1	sGJT	16	native	1	G
1aac51e2-89e2-4bf7-a782-5bb443502996.txt	1	sGJT	29	native	1	U
1aac51e2-89e2-4bf7-a782-5bb443502996.txt	1	sGJT	6	native	1	G
1aac51e2-89e2-4bf7-a782-5bb443502996.txt	1	sGJT	30	native	1	G
1aac51e2-89e2-4bf7-a782-5bb443502996.txt	1	sGJT	2	native	1	U
1aac51e2-89e2-4bf7-a782-5bb443502996.txt	1	sGJT	27	native	1	G
1aac51e2-89e2-4bf7-a782-5bb443502996.txt	1	sGJT	31	native	1	U
1aac51e2-89e2-4bf7-a782-5bb443502996.txt	1	sGJT	22	native	1	G
1aac51e2-89e2-4bf7-a782-5bb443502996.txt	1	sGJT	1	native	1	U
1aac51e2-89e2-4bf7-a782-5bb443502996.txt	1	sGJT	18	native	1	G
1aac51e2-89e2-4bf7-a782-5bb443502996.txt	1	sGJT	2	native	1	G
1aac51e2-89e2-4bf7-a782-5bb443502996.txt	1	sGJT	24	native	1	G
1aac51e2-89e2-4bf7-a782-5bb443502996.txt	1	sGJT	26	native	1	G
1aac51e2-89e2-4bf7-a782-5bb443502996.txt	1	sGJT	33	native	1	G
1aac51e2-89e2-4bf7-a782-5bb443502996.txt	1	sGJT	20	native	1	U
1aac51e2-89e2-4bf7-a782-5bb443502996.txt	0	sGJT	13	native	1	U
1aac51e2-89e2-4bf7-a782-5bb443502996.txt	1	sGJT	30	native	1	U
1aac51e2-89e2-4bf7-a782-5bb443502996.txt	1	sGJT	9	native	1	G
1aac51e2-89e2-4bf7-a782-5bb443502996.txt	1	sGJT	18	native	1	U
1aac51e2-89e2-4bf7-a782-5bb443502996.txt	1	sGJT	35	native	1	U
1aac51e2-89e2-4bf7-a782-5bb443502996.txt	1	sGJT	6	native	1	U
1aac51e2-89e2-4bf7-a782-5bb443502996.txt	1	sGJT	12	native	1	G
1aac51e2-89e2-4bf7-a782-5bb443502996.txt	1	sGJT	10	native	1	G
1aac51e2-89e2-4bf7-a782-5bb443502996.txt	1	sGJT	21	native	1	U
1aac51e2-89e2-4bf7-a782-5bb443502996.txt	1	sGJT	7	native	1	U
1aac51e2-89e2-4bf7-a782-5bb443502996.txt	1	sGJT	5	native	1	U
1aac51e2-89e2-4bf7-a782-5bb443502996.txt	1	sGJT	36	native	1	G
1aac51e2-89e2-4bf7-a782-5bb443502996.txt	1	sGJT	34	native	1	U
1aac51e2-89e2-4bf7-a782-5bb443502996.txt	1	sGJT	14	native	1	G
1aac51e2-89e2-4bf7-a782-5bb443502996.txt	1	sGJT	25	native	1	G
1aac51e2-89e2-4bf7-a782-5bb443502996.txt	1	sGJT	34	native	1	G
1aac51e2-89e2-4bf7-a782-5bb443502996.txt	1	sGJT	8	native	1	G
1aac51e2-89e2-4bf7-a782-5bb443502996.txt	1	sGJT	24	native	1	U
1aac51e2-89e2-4bf7-a782-5bb443502996.txt	1	sGJT	17	native	1	G
1aac51e2-89e2-4bf7-a782-5bb443502996.txt	1	sGJT	28	native	1	G
1aac51e2-89e2-4bf7-a782-5bb443502996.txt	1	sGJT	29	native	1	G
1aac51e2-89e2-4bf7-a782-5bb443502996.txt	1	sGJT	32	native	1	U
1aac51e2-89e2-4bf7-a782-5bb443502996.txt	1	sGJT	5	native	1	G
1aac51e2-89e2-4bf7-a782-5bb443502996.txt	1	sGJT	40	native	1	U
1aac51e2-89e2-4bf7-a782-5bb443502996.txt	1	sGJT	37	native	1	U
1b3180a8-40c6-459b-8acb-9196ccd08920.txt	1	sGJT	6	immersion	1	G
1b3180a8-40c6-459b-8acb-9196ccd08920.txt	1	sGJT	37	immersion	1	U
1b3180a8-40c6-459b-8acb-9196ccd08920.txt	1	sGJT	2	immersion	1	G
1b3180a8-40c6-459b-8acb-9196ccd08920.txt	1	sGJT	9	immersion	1	G
1b3180a8-40c6-459b-8acb-9196ccd08920.txt	1	sGJT	13	immersion	1	U
1b3180a8-40c6-459b-8acb-9196ccd08920.txt	0	sGJT	21	immersion	1	U
1b3180a8-40c6-459b-8acb-9196ccd08920.txt	0	sGJT	22	immersion	1	U
1b3180a8-40c6-459b-8acb-9196ccd08920.txt	1	sGJT	27	immersion	1	G
1b3180a8-40c6-459b-8acb-9196ccd08920.txt	1	sGJT	31	immersion	1	U
1b3180a8-40c6-459b-8acb-9196ccd08920.txt	1	sGJT	29	immersion	1	G
1b3180a8-40c6-459b-8acb-9196ccd08920.txt	1	sGJT	34	immersion	1	G
1b3180a8-40c6-459b-8acb-9196ccd08920.txt	1	sGJT	2	immersion	1	U
1b3180a8-40c6-459b-8acb-9196ccd08920.txt	1	sGJT	36	immersion	1	G
1b3180a8-40c6-459b-8acb-9196ccd08920.txt	1	sGJT	8	immersion	1	U
1b3180a8-40c6-459b-8acb-9196ccd08920.txt	1	sGJT	17	immersion	1	U
1b3180a8-40c6-459b-8acb-9196ccd08920.txt	1	sGJT	1	immersion	1	U
1b3180a8-40c6-459b-8acb-9196ccd08920.txt	1	sGJT	32	immersion	1	U
1b3180a8-40c6-459b-8acb-9196ccd08920.txt	1	sGJT	12	immersion	1	G
1b3180a8-40c6-459b-8acb-9196ccd08920.txt	1	sGJT	25	immersion	1	U
1b3180a8-40c6-459b-8acb-9196ccd08920.txt	1	sGJT	4	immersion	1	U
1b3180a8-40c6-459b-8acb-9196ccd08920.txt	1	sGJT	8	immersion	1	G
1b3180a8-40c6-459b-8acb-9196ccd08920.txt	1	sGJT	16	immersion	1	U
1b3180a8-40c6-459b-8acb-9196ccd08920.txt	1	sGJT	3	immersion	1	U
1b3180a8-40c6-459b-8acb-9196ccd08920.txt	1	sGJT	20	immersion	1	G
1b3180a8-40c6-459b-8acb-9196ccd08920.txt	1	sGJT	27	immersion	1	U
1b3180a8-40c6-459b-8acb-9196ccd08920.txt	1	sGJT	37	immersion	1	G
1b3180a8-40c6-459b-8acb-9196ccd08920.txt	1	sGJT	11	immersion	1	G
1b3180a8-40c6-459b-8acb-9196ccd08920.txt	1	sGJT	9	immersion	1	U
1b3180a8-40c6-459b-8acb-9196ccd08920.txt	1	sGJT	15	immersion	1	G
1b3180a8-40c6-459b-8acb-9196ccd08920.txt	1	sGJT	24	immersion	1	G
1b3180a8-40c6-459b-8acb-9196ccd08920.txt	1	sGJT	24	immersion	1	U
1b3180a8-40c6-459b-8acb-9196ccd08920.txt	1	sGJT	10	immersion	1	G
1b3180a8-40c6-459b-8acb-9196ccd08920.txt	1	sGJT	17	immersion	1	G
1b3180a8-40c6-459b-8acb-9196ccd08920.txt	1	sGJT	36	immersion	1	U
1b3180a8-40c6-459b-8acb-9196ccd08920.txt	1	sGJT	22	immersion	1	G
1b3180a8-40c6-459b-8acb-9196ccd08920.txt	1	sGJT	10	immersion	1	U
1b3180a8-40c6-459b-8acb-9196ccd08920.txt	1	sGJT	5	immersion	1	G
1b3180a8-40c6-459b-8acb-9196ccd08920.txt	1	sGJT	32	immersion	1	G
1b3180a8-40c6-459b-8acb-9196ccd08920.txt	1	sGJT	34	immersion	1	U
1b3180a8-40c6-459b-8acb-9196ccd08920.txt	1	sGJT	6	immersion	1	U
1b3180a8-40c6-459b-8acb-9196ccd08920.txt	1	sGJT	23	immersion	1	G
1b3180a8-40c6-459b-8acb-9196ccd08920.txt	1	sGJT	28	immersion	1	U
1b3180a8-40c6-459b-8acb-9196ccd08920.txt	1	sGJT	33	immersion	1	G
1b3180a8-40c6-459b-8acb-9196ccd08920.txt	1	sGJT	7	immersion	1	U
1b3180a8-40c6-459b-8acb-9196ccd08920.txt	1	sGJT	33	immersion	1	U
1b3180a8-40c6-459b-8acb-9196ccd08920.txt	1	sGJT	30	immersion	1	U
1b3180a8-40c6-459b-8acb-9196ccd08920.txt	1	sGJT	5	immersion	1	U
1b3180a8-40c6-459b-8acb-9196ccd08920.txt	1	sGJT	21	immersion	1	G
1b3180a8-40c6-459b-8acb-9196ccd08920.txt	1	sGJT	38	immersion	1	G
1b3180a8-40c6-459b-8acb-9196ccd08920.txt	0	sGJT	15	immersion	1	U
1b3180a8-40c6-459b-8acb-9196ccd08920.txt	1	sGJT	35	immersion	1	G
1b3180a8-40c6-459b-8acb-9196ccd08920.txt	0	sGJT	40	immersion	1	U
1b3180a8-40c6-459b-8acb-9196ccd08920.txt	1	sGJT	14	immersion	1	G
1b3180a8-40c6-459b-8acb-9196ccd08920.txt	1	sGJT	38	immersion	1	U
1b3180a8-40c6-459b-8acb-9196ccd08920.txt	0	sGJT	19	immersion	1	U
1b3180a8-40c6-459b-8acb-9196ccd08920.txt	1	sGJT	14	immersion	1	U
1b3180a8-40c6-459b-8acb-9196ccd08920.txt	1	sGJT	7	immersion	1	G
1b3180a8-40c6-459b-8acb-9196ccd08920.txt	1	sGJT	31	immersion	1	G
1b3180a8-40c6-459b-8acb-9196ccd08920.txt	1	sGJT	35	immersion	1	U
1b3180a8-40c6-459b-8acb-9196ccd08920.txt	1	sGJT	26	immersion	1	G
1b3180a8-40c6-459b-8acb-9196ccd08920.txt	1	sGJT	11	immersion	1	U
1b3180a8-40c6-459b-8acb-9196ccd08920.txt	1	sGJT	19	immersion	1	G
1b3180a8-40c6-459b-8acb-9196ccd08920.txt	1	sGJT	20	immersion	1	U
1b3180a8-40c6-459b-8acb-9196ccd08920.txt	1	sGJT	3	immersion	1	G
1b3180a8-40c6-459b-8acb-9196ccd08920.txt	0	sGJT	23	immersion	1	U
1b3180a8-40c6-459b-8acb-9196ccd08920.txt	1	sGJT	39	immersion	1	U
1b3180a8-40c6-459b-8acb-9196ccd08920.txt	1	sGJT	13	immersion	1	G
1b3180a8-40c6-459b-8acb-9196ccd08920.txt	1	sGJT	18	immersion	1	G
1b3180a8-40c6-459b-8acb-9196ccd08920.txt	1	sGJT	4	immersion	1	G
1b3180a8-40c6-459b-8acb-9196ccd08920.txt	1	sGJT	1	immersion	1	G
1b3180a8-40c6-459b-8acb-9196ccd08920.txt	1	sGJT	39	immersion	1	G
1b3180a8-40c6-459b-8acb-9196ccd08920.txt	1	sGJT	28	immersion	1	G
1b3180a8-40c6-459b-8acb-9196ccd08920.txt	1	sGJT	12	immersion	1	U
1b3180a8-40c6-459b-8acb-9196ccd08920.txt	1	sGJT	26	immersion	1	U
1b3180a8-40c6-459b-8acb-9196ccd08920.txt	1	sGJT	16	immersion	1	G
1b3180a8-40c6-459b-8acb-9196ccd08920.txt	0	sGJT	29	immersion	1	U
1b3180a8-40c6-459b-8acb-9196ccd08920.txt	1	sGJT	18	immersion	1	U
1b3180a8-40c6-459b-8acb-9196ccd08920.txt	1	sGJT	40	immersion	1	G
1b3180a8-40c6-459b-8acb-9196ccd08920.txt	1	sGJT	30	immersion	1	G
1b3180a8-40c6-459b-8acb-9196ccd08920.txt	1	sGJT	25	immersion	1	G
1c3424ac-7368-4c3a-8bec-bbf83bc5d59d.txt	0	sGJT	24	classroom	1	G
1c3424ac-7368-4c3a-8bec-bbf83bc5d59d.txt	0	sGJT	35	classroom	1	U
1c3424ac-7368-4c3a-8bec-bbf83bc5d59d.txt	1	sGJT	32	classroom	1	U
1c3424ac-7368-4c3a-8bec-bbf83bc5d59d.txt	0	sGJT	3	classroom	1	G
1c3424ac-7368-4c3a-8bec-bbf83bc5d59d.txt	0	sGJT	39	classroom	1	G
1c3424ac-7368-4c3a-8bec-bbf83bc5d59d.txt	0	sGJT	36	classroom	1	U
1c3424ac-7368-4c3a-8bec-bbf83bc5d59d.txt	1	sGJT	10	classroom	1	G
1c3424ac-7368-4c3a-8bec-bbf83bc5d59d.txt	0	sGJT	8	classroom	1	G
1c3424ac-7368-4c3a-8bec-bbf83bc5d59d.txt	1	sGJT	10	classroom	1	U
1c3424ac-7368-4c3a-8bec-bbf83bc5d59d.txt	1	sGJT	27	classroom	1	G
1c3424ac-7368-4c3a-8bec-bbf83bc5d59d.txt	0	sGJT	14	classroom	1	U
1c3424ac-7368-4c3a-8bec-bbf83bc5d59d.txt	1	sGJT	17	classroom	1	G
1c3424ac-7368-4c3a-8bec-bbf83bc5d59d.txt	1	sGJT	6	classroom	1	G
1c3424ac-7368-4c3a-8bec-bbf83bc5d59d.txt	1	sGJT	2	classroom	1	G
1c3424ac-7368-4c3a-8bec-bbf83bc5d59d.txt	0	sGJT	25	classroom	1	U
1c3424ac-7368-4c3a-8bec-bbf83bc5d59d.txt	0	sGJT	15	classroom	1	U
1c3424ac-7368-4c3a-8bec-bbf83bc5d59d.txt	1	sGJT	1	classroom	1	G
1c3424ac-7368-4c3a-8bec-bbf83bc5d59d.txt	1	sGJT	37	classroom	1	G
1c3424ac-7368-4c3a-8bec-bbf83bc5d59d.txt	0	sGJT	33	classroom	1	G
1c3424ac-7368-4c3a-8bec-bbf83bc5d59d.txt	1	sGJT	18	classroom	1	U
1c3424ac-7368-4c3a-8bec-bbf83bc5d59d.txt	1	sGJT	35	classroom	1	G
1c3424ac-7368-4c3a-8bec-bbf83bc5d59d.txt	0	sGJT	40	classroom	1	U
1c3424ac-7368-4c3a-8bec-bbf83bc5d59d.txt	1	sGJT	7	classroom	1	U
1c3424ac-7368-4c3a-8bec-bbf83bc5d59d.txt	1	sGJT	37	classroom	1	U
1c3424ac-7368-4c3a-8bec-bbf83bc5d59d.txt	0	sGJT	19	classroom	1	G
1c3424ac-7368-4c3a-8bec-bbf83bc5d59d.txt	1	sGJT	38	classroom	1	G
1c3424ac-7368-4c3a-8bec-bbf83bc5d59d.txt	0	sGJT	31	classroom	1	U
1c3424ac-7368-4c3a-8bec-bbf83bc5d59d.txt	1	sGJT	32	classroom	1	G
1c3424ac-7368-4c3a-8bec-bbf83bc5d59d.txt	1	sGJT	22	classroom	1	U
1c3424ac-7368-4c3a-8bec-bbf83bc5d59d.txt	1	sGJT	5	classroom	1	G
1c3424ac-7368-4c3a-8bec-bbf83bc5d59d.txt	1	sGJT	38	classroom	1	U
1c3424ac-7368-4c3a-8bec-bbf83bc5d59d.txt	1	sGJT	30	classroom	1	G
1c3424ac-7368-4c3a-8bec-bbf83bc5d59d.txt	1	sGJT	16	classroom	1	U
1c3424ac-7368-4c3a-8bec-bbf83bc5d59d.txt	0	sGJT	40	classroom	1	G
1c3424ac-7368-4c3a-8bec-bbf83bc5d59d.txt	0	sGJT	21	classroom	1	U
1c3424ac-7368-4c3a-8bec-bbf83bc5d59d.txt	1	sGJT	30	classroom	1	U
1c3424ac-7368-4c3a-8bec-bbf83bc5d59d.txt	1	sGJT	13	classroom	1	G
1c3424ac-7368-4c3a-8bec-bbf83bc5d59d.txt	1	sGJT	25	classroom	1	G
1c3424ac-7368-4c3a-8bec-bbf83bc5d59d.txt	1	sGJT	16	classroom	1	G
1c3424ac-7368-4c3a-8bec-bbf83bc5d59d.txt	0	sGJT	19	classroom	1	U
1c3424ac-7368-4c3a-8bec-bbf83bc5d59d.txt	1	sGJT	12	classroom	1	G
1c3424ac-7368-4c3a-8bec-bbf83bc5d59d.txt	0	sGJT	39	classroom	1	U
1c3424ac-7368-4c3a-8bec-bbf83bc5d59d.txt	1	sGJT	12	classroom	1	U
1c3424ac-7368-4c3a-8bec-bbf83bc5d59d.txt	0	sGJT	13	classroom	1	U
1c3424ac-7368-4c3a-8bec-bbf83bc5d59d.txt	1	sGJT	11	classroom	1	U
1c3424ac-7368-4c3a-8bec-bbf83bc5d59d.txt	1	sGJT	20	classroom	1	U
1c3424ac-7368-4c3a-8bec-bbf83bc5d59d.txt	0	sGJT	23	classroom	1	U
1c3424ac-7368-4c3a-8bec-bbf83bc5d59d.txt	1	sGJT	28	classroom	1	U
1c3424ac-7368-4c3a-8bec-bbf83bc5d59d.txt	1	sGJT	29	classroom	1	G
1c3424ac-7368-4c3a-8bec-bbf83bc5d59d.txt	1	sGJT	3	classroom	1	U
1c3424ac-7368-4c3a-8bec-bbf83bc5d59d.txt	0	sGJT	36	classroom	1	G
1c3424ac-7368-4c3a-8bec-bbf83bc5d59d.txt	1	sGJT	20	classroom	1	G
1c3424ac-7368-4c3a-8bec-bbf83bc5d59d.txt	1	sGJT	9	classroom	1	G
1c3424ac-7368-4c3a-8bec-bbf83bc5d59d.txt	0	sGJT	6	classroom	1	U
1c3424ac-7368-4c3a-8bec-bbf83bc5d59d.txt	0	sGJT	27	classroom	1	U
1c3424ac-7368-4c3a-8bec-bbf83bc5d59d.txt	1	sGJT	4	classroom	1	U
1c3424ac-7368-4c3a-8bec-bbf83bc5d59d.txt	1	sGJT	29	classroom	1	U
1c3424ac-7368-4c3a-8bec-bbf83bc5d59d.txt	1	sGJT	9	classroom	1	U
1c3424ac-7368-4c3a-8bec-bbf83bc5d59d.txt	1	sGJT	21	classroom	1	G
1c3424ac-7368-4c3a-8bec-bbf83bc5d59d.txt	0	sGJT	14	classroom	1	G
1c3424ac-7368-4c3a-8bec-bbf83bc5d59d.txt	0	sGJT	23	classroom	1	G
1c3424ac-7368-4c3a-8bec-bbf83bc5d59d.txt	0	sGJT	22	classroom	1	G
1c3424ac-7368-4c3a-8bec-bbf83bc5d59d.txt	1	sGJT	7	classroom	1	G
1c3424ac-7368-4c3a-8bec-bbf83bc5d59d.txt	1	sGJT	34	classroom	1	G
1c3424ac-7368-4c3a-8bec-bbf83bc5d59d.txt	1	sGJT	11	classroom	1	G
1c3424ac-7368-4c3a-8bec-bbf83bc5d59d.txt	1	sGJT	18	classroom	1	G
1c3424ac-7368-4c3a-8bec-bbf83bc5d59d.txt	0	sGJT	33	classroom	1	U
1c3424ac-7368-4c3a-8bec-bbf83bc5d59d.txt	1	sGJT	8	classroom	1	U
1c3424ac-7368-4c3a-8bec-bbf83bc5d59d.txt	1	sGJT	34	classroom	1	U
1c3424ac-7368-4c3a-8bec-bbf83bc5d59d.txt	1	sGJT	28	classroom	1	G
1c3424ac-7368-4c3a-8bec-bbf83bc5d59d.txt	1	sGJT	5	classroom	1	U
1c3424ac-7368-4c3a-8bec-bbf83bc5d59d.txt	0	sGJT	15	classroom	1	G
1c3424ac-7368-4c3a-8bec-bbf83bc5d59d.txt	1	sGJT	2	classroom	1	U
1c3424ac-7368-4c3a-8bec-bbf83bc5d59d.txt	1	sGJT	4	classroom	1	G
1c3424ac-7368-4c3a-8bec-bbf83bc5d59d.txt	0	sGJT	26	classroom	1	G
1c3424ac-7368-4c3a-8bec-bbf83bc5d59d.txt	1	sGJT	24	classroom	1	U
1c3424ac-7368-4c3a-8bec-bbf83bc5d59d.txt	1	sGJT	17	classroom	1	U
1c3424ac-7368-4c3a-8bec-bbf83bc5d59d.txt	1	sGJT	31	classroom	1	G
1c3424ac-7368-4c3a-8bec-bbf83bc5d59d.txt	1	sGJT	1	classroom	1	U
1c3424ac-7368-4c3a-8bec-bbf83bc5d59d.txt	1	sGJT	26	classroom	1	U
1fd07820-2081-4324-a328-437795eca2c6.txt	1	sGJT	7	immersion	1	G
1fd07820-2081-4324-a328-437795eca2c6.txt	1	sGJT	23	immersion	1	G
1fd07820-2081-4324-a328-437795eca2c6.txt	1	sGJT	16	immersion	1	U
1fd07820-2081-4324-a328-437795eca2c6.txt	1	sGJT	2	immersion	1	U
1fd07820-2081-4324-a328-437795eca2c6.txt	1	sGJT	35	immersion	1	G
1fd07820-2081-4324-a328-437795eca2c6.txt	0	sGJT	3	immersion	1	U
1fd07820-2081-4324-a328-437795eca2c6.txt	1	sGJT	28	immersion	1	U
1fd07820-2081-4324-a328-437795eca2c6.txt	1	sGJT	33	immersion	1	G
1fd07820-2081-4324-a328-437795eca2c6.txt	1	sGJT	14	immersion	1	U
1fd07820-2081-4324-a328-437795eca2c6.txt	1	sGJT	14	immersion	1	G
1fd07820-2081-4324-a328-437795eca2c6.txt	0	sGJT	16	immersion	1	G
1fd07820-2081-4324-a328-437795eca2c6.txt	0	sGJT	26	immersion	1	U
1fd07820-2081-4324-a328-437795eca2c6.txt	0	sGJT	24	immersion	1	G
1fd07820-2081-4324-a328-437795eca2c6.txt	1	sGJT	5	immersion	1	G
1fd07820-2081-4324-a328-437795eca2c6.txt	1	sGJT	6	immersion	1	G
1fd07820-2081-4324-a328-437795eca2c6.txt	0	sGJT	13	immersion	1	U
1fd07820-2081-4324-a328-437795eca2c6.txt	1	sGJT	28	immersion	1	G
1fd07820-2081-4324-a328-437795eca2c6.txt	0	sGJT	20	immersion	1	G
1fd07820-2081-4324-a328-437795eca2c6.txt	1	sGJT	8	immersion	1	G
1fd07820-2081-4324-a328-437795eca2c6.txt	1	sGJT	10	immersion	1	U
1fd07820-2081-4324-a328-437795eca2c6.txt	1	sGJT	11	immersion	1	U
1fd07820-2081-4324-a328-437795eca2c6.txt	1	sGJT	34	immersion	1	U
1fd07820-2081-4324-a328-437795eca2c6.txt	1	sGJT	36	immersion	1	U
1fd07820-2081-4324-a328-437795eca2c6.txt	1	sGJT	38	immersion	1	G
1fd07820-2081-4324-a328-437795eca2c6.txt	1	sGJT	40	immersion	1	G
1fd07820-2081-4324-a328-437795eca2c6.txt	0	sGJT	7	immersion	1	U
1fd07820-2081-4324-a328-437795eca2c6.txt	0	sGJT	17	immersion	1	G
1fd07820-2081-4324-a328-437795eca2c6.txt	0	sGJT	1	immersion	1	U
1fd07820-2081-4324-a328-437795eca2c6.txt	1	sGJT	18	immersion	1	G
1fd07820-2081-4324-a328-437795eca2c6.txt	1	sGJT	31	immersion	1	G
1fd07820-2081-4324-a328-437795eca2c6.txt	1	sGJT	11	immersion	1	G
1fd07820-2081-4324-a328-437795eca2c6.txt	1	sGJT	19	immersion	1	U
1fd07820-2081-4324-a328-437795eca2c6.txt	1	sGJT	8	immersion	1	U
1fd07820-2081-4324-a328-437795eca2c6.txt	1	sGJT	5	immersion	1	U
1fd07820-2081-4324-a328-437795eca2c6.txt	0	sGJT	40	immersion	1	U
1fd07820-2081-4324-a328-437795eca2c6.txt	1	sGJT	27	immersion	1	U
1fd07820-2081-4324-a328-437795eca2c6.txt	0	sGJT	6	immersion	1	U
1fd07820-2081-4324-a328-437795eca2c6.txt	1	sGJT	17	immersion	1	U
1fd07820-2081-4324-a328-437795eca2c6.txt	0	sGJT	26	immersion	1	G
1fd07820-2081-4324-a328-437795eca2c6.txt	1	sGJT	29	immersion	1	G
1fd07820-2081-4324-a328-437795eca2c6.txt	1	sGJT	32	immersion	1	G
1fd07820-2081-4324-a328-437795eca2c6.txt	1	sGJT	32	immersion	1	U
1fd07820-2081-4324-a328-437795eca2c6.txt	0	sGJT	33	immersion	1	U
1fd07820-2081-4324-a328-437795eca2c6.txt	1	sGJT	15	immersion	1	G
1fd07820-2081-4324-a328-437795eca2c6.txt	1	sGJT	21	immersion	1	G
1fd07820-2081-4324-a328-437795eca2c6.txt	0	sGJT	36	immersion	1	G
1fd07820-2081-4324-a328-437795eca2c6.txt	0	sGJT	39	immersion	1	G
1fd07820-2081-4324-a328-437795eca2c6.txt	1	sGJT	18	immersion	1	U
1fd07820-2081-4324-a328-437795eca2c6.txt	1	sGJT	25	immersion	1	G
1fd07820-2081-4324-a328-437795eca2c6.txt	0	sGJT	25	immersion	1	U
1fd07820-2081-4324-a328-437795eca2c6.txt	1	sGJT	9	immersion	1	G
1fd07820-2081-4324-a328-437795eca2c6.txt	1	sGJT	1	immersion	1	G
1fd07820-2081-4324-a328-437795eca2c6.txt	0	sGJT	35	immersion	1	U
1fd07820-2081-4324-a328-437795eca2c6.txt	1	sGJT	10	immersion	1	G
1fd07820-2081-4324-a328-437795eca2c6.txt	1	sGJT	19	immersion	1	G
1fd07820-2081-4324-a328-437795eca2c6.txt	1	sGJT	9	immersion	1	U
1fd07820-2081-4324-a328-437795eca2c6.txt	0	sGJT	20	immersion	1	U
1fd07820-2081-4324-a328-437795eca2c6.txt	1	sGJT	39	immersion	1	U
1fd07820-2081-4324-a328-437795eca2c6.txt	0	sGJT	3	immersion	1	G
1fd07820-2081-4324-a328-437795eca2c6.txt	1	sGJT	30	immersion	1	G
1fd07820-2081-4324-a328-437795eca2c6.txt	1	sGJT	30	immersion	1	U
1fd07820-2081-4324-a328-437795eca2c6.txt	1	sGJT	4	immersion	1	G
1fd07820-2081-4324-a328-437795eca2c6.txt	1	sGJT	24	immersion	1	U
1fd07820-2081-4324-a328-437795eca2c6.txt	0	sGJT	12	immersion	1	G
1fd07820-2081-4324-a328-437795eca2c6.txt	1	sGJT	23	immersion	1	U
1fd07820-2081-4324-a328-437795eca2c6.txt	1	sGJT	13	immersion	1	G
1fd07820-2081-4324-a328-437795eca2c6.txt	1	sGJT	4	immersion	1	U
1fd07820-2081-4324-a328-437795eca2c6.txt	0	sGJT	37	immersion	1	U
1fd07820-2081-4324-a328-437795eca2c6.txt	1	sGJT	12	immersion	1	U
1fd07820-2081-4324-a328-437795eca2c6.txt	0	sGJT	15	immersion	1	U
1fd07820-2081-4324-a328-437795eca2c6.txt	1	sGJT	29	immersion	1	U
1fd07820-2081-4324-a328-437795eca2c6.txt	0	sGJT	31	immersion	1	U
1fd07820-2081-4324-a328-437795eca2c6.txt	1	sGJT	2	immersion	1	G
1fd07820-2081-4324-a328-437795eca2c6.txt	0	sGJT	37	immersion	1	G
1fd07820-2081-4324-a328-437795eca2c6.txt	1	sGJT	34	immersion	1	G
1fd07820-2081-4324-a328-437795eca2c6.txt	1	sGJT	27	immersion	1	G
1fd07820-2081-4324-a328-437795eca2c6.txt	1	sGJT	22	immersion	1	G
1fd07820-2081-4324-a328-437795eca2c6.txt	1	sGJT	38	immersion	1	U
20501460-5eef-4b8a-860c-97f5c32e6b8f.txt	1	sGJT	21	native	1	G
20501460-5eef-4b8a-860c-97f5c32e6b8f.txt	0	sGJT	15	native	1	U
20501460-5eef-4b8a-860c-97f5c32e6b8f.txt	1	sGJT	5	native	1	U
20501460-5eef-4b8a-860c-97f5c32e6b8f.txt	1	sGJT	16	native	1	G
20501460-5eef-4b8a-860c-97f5c32e6b8f.txt	1	sGJT	8	native	1	G
20501460-5eef-4b8a-860c-97f5c32e6b8f.txt	1	sGJT	34	native	1	U
20501460-5eef-4b8a-860c-97f5c32e6b8f.txt	1	sGJT	7	native	1	U
20501460-5eef-4b8a-860c-97f5c32e6b8f.txt	1	sGJT	9	native	1	G
20501460-5eef-4b8a-860c-97f5c32e6b8f.txt	1	sGJT	20	native	1	U
20501460-5eef-4b8a-860c-97f5c32e6b8f.txt	1	sGJT	25	native	1	G
20501460-5eef-4b8a-860c-97f5c32e6b8f.txt	1	sGJT	4	native	1	U
20501460-5eef-4b8a-860c-97f5c32e6b8f.txt	1	sGJT	40	native	1	U
20501460-5eef-4b8a-860c-97f5c32e6b8f.txt	1	sGJT	3	native	1	U
20501460-5eef-4b8a-860c-97f5c32e6b8f.txt	1	sGJT	12	native	1	G
20501460-5eef-4b8a-860c-97f5c32e6b8f.txt	1	sGJT	11	native	1	G
20501460-5eef-4b8a-860c-97f5c32e6b8f.txt	1	sGJT	38	native	1	G
20501460-5eef-4b8a-860c-97f5c32e6b8f.txt	1	sGJT	6	native	1	U
20501460-5eef-4b8a-860c-97f5c32e6b8f.txt	1	sGJT	23	native	1	G
20501460-5eef-4b8a-860c-97f5c32e6b8f.txt	1	sGJT	39	native	1	G
20501460-5eef-4b8a-860c-97f5c32e6b8f.txt	1	sGJT	24	native	1	U
20501460-5eef-4b8a-860c-97f5c32e6b8f.txt	1	sGJT	32	native	1	U
20501460-5eef-4b8a-860c-97f5c32e6b8f.txt	1	sGJT	18	native	1	U
20501460-5eef-4b8a-860c-97f5c32e6b8f.txt	1	sGJT	9	native	1	U
20501460-5eef-4b8a-860c-97f5c32e6b8f.txt	1	sGJT	10	native	1	G
20501460-5eef-4b8a-860c-97f5c32e6b8f.txt	1	sGJT	17	native	1	U
20501460-5eef-4b8a-860c-97f5c32e6b8f.txt	1	sGJT	33	native	1	G
20501460-5eef-4b8a-860c-97f5c32e6b8f.txt	1	sGJT	29	native	1	U
20501460-5eef-4b8a-860c-97f5c32e6b8f.txt	1	sGJT	26	native	1	U
20501460-5eef-4b8a-860c-97f5c32e6b8f.txt	1	sGJT	6	native	1	G
20501460-5eef-4b8a-860c-97f5c32e6b8f.txt	1	sGJT	22	native	1	U
20501460-5eef-4b8a-860c-97f5c32e6b8f.txt	1	sGJT	34	native	1	G
20501460-5eef-4b8a-860c-97f5c32e6b8f.txt	0	sGJT	23	native	1	U
20501460-5eef-4b8a-860c-97f5c32e6b8f.txt	1	sGJT	20	native	1	G
20501460-5eef-4b8a-860c-97f5c32e6b8f.txt	1	sGJT	1	native	1	U
20501460-5eef-4b8a-860c-97f5c32e6b8f.txt	1	sGJT	33	native	1	U
20501460-5eef-4b8a-860c-97f5c32e6b8f.txt	1	sGJT	11	native	1	U
20501460-5eef-4b8a-860c-97f5c32e6b8f.txt	1	sGJT	18	native	1	G
20501460-5eef-4b8a-860c-97f5c32e6b8f.txt	0	sGJT	37	native	1	U
20501460-5eef-4b8a-860c-97f5c32e6b8f.txt	1	sGJT	5	native	1	G
20501460-5eef-4b8a-860c-97f5c32e6b8f.txt	1	sGJT	21	native	1	U
20501460-5eef-4b8a-860c-97f5c32e6b8f.txt	1	sGJT	8	native	1	U
20501460-5eef-4b8a-860c-97f5c32e6b8f.txt	1	sGJT	29	native	1	G
20501460-5eef-4b8a-860c-97f5c32e6b8f.txt	1	sGJT	2	native	1	U
20501460-5eef-4b8a-860c-97f5c32e6b8f.txt	1	sGJT	31	native	1	G
20501460-5eef-4b8a-860c-97f5c32e6b8f.txt	1	sGJT	40	native	1	G
20501460-5eef-4b8a-860c-97f5c32e6b8f.txt	1	sGJT	35	native	1	U
20501460-5eef-4b8a-860c-97f5c32e6b8f.txt	1	sGJT	14	native	1	G
20501460-5eef-4b8a-860c-97f5c32e6b8f.txt	1	sGJT	12	native	1	U
20501460-5eef-4b8a-860c-97f5c32e6b8f.txt	1	sGJT	2	native	1	G
20501460-5eef-4b8a-860c-97f5c32e6b8f.txt	1	sGJT	24	native	1	G
20501460-5eef-4b8a-860c-97f5c32e6b8f.txt	1	sGJT	31	native	1	U
20501460-5eef-4b8a-860c-97f5c32e6b8f.txt	1	sGJT	25	native	1	U
20501460-5eef-4b8a-860c-97f5c32e6b8f.txt	1	sGJT	19	native	1	G
20501460-5eef-4b8a-860c-97f5c32e6b8f.txt	1	sGJT	32	native	1	G
20501460-5eef-4b8a-860c-97f5c32e6b8f.txt	1	sGJT	28	native	1	G
20501460-5eef-4b8a-860c-97f5c32e6b8f.txt	1	sGJT	14	native	1	U
20501460-5eef-4b8a-860c-97f5c32e6b8f.txt	0	sGJT	36	native	1	G
20501460-5eef-4b8a-860c-97f5c32e6b8f.txt	1	sGJT	3	native	1	G
20501460-5eef-4b8a-860c-97f5c32e6b8f.txt	1	sGJT	26	native	1	G
20501460-5eef-4b8a-860c-97f5c32e6b8f.txt	1	sGJT	7	native	1	G
20501460-5eef-4b8a-860c-97f5c32e6b8f.txt	1	sGJT	39	native	1	U
20501460-5eef-4b8a-860c-97f5c32e6b8f.txt	1	sGJT	30	native	1	G
20501460-5eef-4b8a-860c-97f5c32e6b8f.txt	1	sGJT	27	native	1	G
20501460-5eef-4b8a-860c-97f5c32e6b8f.txt	1	sGJT	35	native	1	G
20501460-5eef-4b8a-860c-97f5c32e6b8f.txt	1	sGJT	17	native	1	G
20501460-5eef-4b8a-860c-97f5c32e6b8f.txt	1	sGJT	37	native	1	G
20501460-5eef-4b8a-860c-97f5c32e6b8f.txt	1	sGJT	27	native	1	U
20501460-5eef-4b8a-860c-97f5c32e6b8f.txt	1	sGJT	1	native	1	G
20501460-5eef-4b8a-860c-97f5c32e6b8f.txt	1	sGJT	16	native	1	U
20501460-5eef-4b8a-860c-97f5c32e6b8f.txt	1	sGJT	28	native	1	U
20501460-5eef-4b8a-860c-97f5c32e6b8f.txt	1	sGJT	15	native	1	G
20501460-5eef-4b8a-860c-97f5c32e6b8f.txt	1	sGJT	13	native	1	U
20501460-5eef-4b8a-860c-97f5c32e6b8f.txt	1	sGJT	10	native	1	U
20501460-5eef-4b8a-860c-97f5c32e6b8f.txt	1	sGJT	13	native	1	G
20501460-5eef-4b8a-860c-97f5c32e6b8f.txt	1	sGJT	19	native	1	U
20501460-5eef-4b8a-860c-97f5c32e6b8f.txt	1	sGJT	22	native	1	G
20501460-5eef-4b8a-860c-97f5c32e6b8f.txt	0	sGJT	36	native	1	U
20501460-5eef-4b8a-860c-97f5c32e6b8f.txt	1	sGJT	30	native	1	U
20501460-5eef-4b8a-860c-97f5c32e6b8f.txt	1	sGJT	38	native	1	U
20501460-5eef-4b8a-860c-97f5c32e6b8f.txt	1	sGJT	4	native	1	G
243a99aa-212e-463a-aabc-2ecf2f049444.txt	0	sGJT	3	immersion	1	U
243a99aa-212e-463a-aabc-2ecf2f049444.txt	1	sGJT	35	immersion	1	G
243a99aa-212e-463a-aabc-2ecf2f049444.txt	1	sGJT	38	immersion	1	U
243a99aa-212e-463a-aabc-2ecf2f049444.txt	1	sGJT	37	immersion	1	U
243a99aa-212e-463a-aabc-2ecf2f049444.txt	1	sGJT	21	immersion	1	U
243a99aa-212e-463a-aabc-2ecf2f049444.txt	0	sGJT	40	immersion	1	G
243a99aa-212e-463a-aabc-2ecf2f049444.txt	1	sGJT	39	immersion	1	U
243a99aa-212e-463a-aabc-2ecf2f049444.txt	0	sGJT	12	immersion	1	G
243a99aa-212e-463a-aabc-2ecf2f049444.txt	1	sGJT	18	immersion	1	G
243a99aa-212e-463a-aabc-2ecf2f049444.txt	1	sGJT	20	immersion	1	U
243a99aa-212e-463a-aabc-2ecf2f049444.txt	1	sGJT	8	immersion	1	U
243a99aa-212e-463a-aabc-2ecf2f049444.txt	1	sGJT	5	immersion	1	U
243a99aa-212e-463a-aabc-2ecf2f049444.txt	1	sGJT	25	immersion	1	U
243a99aa-212e-463a-aabc-2ecf2f049444.txt	0	sGJT	13	immersion	1	U
243a99aa-212e-463a-aabc-2ecf2f049444.txt	1	sGJT	23	immersion	1	U
243a99aa-212e-463a-aabc-2ecf2f049444.txt	1	sGJT	38	immersion	1	G
243a99aa-212e-463a-aabc-2ecf2f049444.txt	1	sGJT	36	immersion	1	U
243a99aa-212e-463a-aabc-2ecf2f049444.txt	0	sGJT	29	immersion	1	G
243a99aa-212e-463a-aabc-2ecf2f049444.txt	1	sGJT	6	immersion	1	G
243a99aa-212e-463a-aabc-2ecf2f049444.txt	1	sGJT	8	immersion	1	G
243a99aa-212e-463a-aabc-2ecf2f049444.txt	1	sGJT	20	immersion	1	G
243a99aa-212e-463a-aabc-2ecf2f049444.txt	0	sGJT	3	immersion	1	G
243a99aa-212e-463a-aabc-2ecf2f049444.txt	1	sGJT	19	immersion	1	U
243a99aa-212e-463a-aabc-2ecf2f049444.txt	0	sGJT	7	immersion	1	U
243a99aa-212e-463a-aabc-2ecf2f049444.txt	1	sGJT	35	immersion	1	U
243a99aa-212e-463a-aabc-2ecf2f049444.txt	1	sGJT	13	immersion	1	G
243a99aa-212e-463a-aabc-2ecf2f049444.txt	1	sGJT	11	immersion	1	G
243a99aa-212e-463a-aabc-2ecf2f049444.txt	1	sGJT	12	immersion	1	U
243a99aa-212e-463a-aabc-2ecf2f049444.txt	0	sGJT	11	immersion	1	U
243a99aa-212e-463a-aabc-2ecf2f049444.txt	1	sGJT	17	immersion	1	U
243a99aa-212e-463a-aabc-2ecf2f049444.txt	1	sGJT	16	immersion	1	U
243a99aa-212e-463a-aabc-2ecf2f049444.txt	0	sGJT	6	immersion	1	U
243a99aa-212e-463a-aabc-2ecf2f049444.txt	1	sGJT	1	immersion	1	G
243a99aa-212e-463a-aabc-2ecf2f049444.txt	0	sGJT	1	immersion	1	U
243a99aa-212e-463a-aabc-2ecf2f049444.txt	1	sGJT	10	immersion	1	G
243a99aa-212e-463a-aabc-2ecf2f049444.txt	1	sGJT	28	immersion	1	U
243a99aa-212e-463a-aabc-2ecf2f049444.txt	1	sGJT	2	immersion	1	G
243a99aa-212e-463a-aabc-2ecf2f049444.txt	1	sGJT	5	immersion	1	G
243a99aa-212e-463a-aabc-2ecf2f049444.txt	0	sGJT	36	immersion	1	G
243a99aa-212e-463a-aabc-2ecf2f049444.txt	1	sGJT	24	immersion	1	G
243a99aa-212e-463a-aabc-2ecf2f049444.txt	1	sGJT	9	immersion	1	U
243a99aa-212e-463a-aabc-2ecf2f049444.txt	1	sGJT	16	immersion	1	G
243a99aa-212e-463a-aabc-2ecf2f049444.txt	1	sGJT	33	immersion	1	G
243a99aa-212e-463a-aabc-2ecf2f049444.txt	1	sGJT	14	immersion	1	U
243a99aa-212e-463a-aabc-2ecf2f049444.txt	1	sGJT	18	immersion	1	U
243a99aa-212e-463a-aabc-2ecf2f049444.txt	0	sGJT	15	immersion	1	U
243a99aa-212e-463a-aabc-2ecf2f049444.txt	1	sGJT	27	immersion	1	G
243a99aa-212e-463a-aabc-2ecf2f049444.txt	1	sGJT	19	immersion	1	G
243a99aa-212e-463a-aabc-2ecf2f049444.txt	1	sGJT	2	immersion	1	U
243a99aa-212e-463a-aabc-2ecf2f049444.txt	1	sGJT	21	immersion	1	G
243a99aa-212e-463a-aabc-2ecf2f049444.txt	1	sGJT	33	immersion	1	U
243a99aa-212e-463a-aabc-2ecf2f049444.txt	1	sGJT	14	immersion	1	G
243a99aa-212e-463a-aabc-2ecf2f049444.txt	1	sGJT	24	immersion	1	U
243a99aa-212e-463a-aabc-2ecf2f049444.txt	1	sGJT	26	immersion	1	U
243a99aa-212e-463a-aabc-2ecf2f049444.txt	1	sGJT	22	immersion	1	U
243a99aa-212e-463a-aabc-2ecf2f049444.txt	1	sGJT	23	immersion	1	G
243a99aa-212e-463a-aabc-2ecf2f049444.txt	1	sGJT	15	immersion	1	G
243a99aa-212e-463a-aabc-2ecf2f049444.txt	1	sGJT	29	immersion	1	U
243a99aa-212e-463a-aabc-2ecf2f049444.txt	1	sGJT	9	immersion	1	G
243a99aa-212e-463a-aabc-2ecf2f049444.txt	1	sGJT	34	immersion	1	U
243a99aa-212e-463a-aabc-2ecf2f049444.txt	1	sGJT	31	immersion	1	G
243a99aa-212e-463a-aabc-2ecf2f049444.txt	1	sGJT	26	immersion	1	G
243a99aa-212e-463a-aabc-2ecf2f049444.txt	1	sGJT	10	immersion	1	U
243a99aa-212e-463a-aabc-2ecf2f049444.txt	0	sGJT	39	immersion	1	G
243a99aa-212e-463a-aabc-2ecf2f049444.txt	1	sGJT	32	immersion	1	U
243a99aa-212e-463a-aabc-2ecf2f049444.txt	1	sGJT	40	immersion	1	U
243a99aa-212e-463a-aabc-2ecf2f049444.txt	1	sGJT	4	immersion	1	U
243a99aa-212e-463a-aabc-2ecf2f049444.txt	1	sGJT	28	immersion	1	G
243a99aa-212e-463a-aabc-2ecf2f049444.txt	1	sGJT	32	immersion	1	G
243a99aa-212e-463a-aabc-2ecf2f049444.txt	1	sGJT	27	immersion	1	U
243a99aa-212e-463a-aabc-2ecf2f049444.txt	1	sGJT	34	immersion	1	G
243a99aa-212e-463a-aabc-2ecf2f049444.txt	1	sGJT	37	immersion	1	G
243a99aa-212e-463a-aabc-2ecf2f049444.txt	1	sGJT	30	immersion	1	G
243a99aa-212e-463a-aabc-2ecf2f049444.txt	1	sGJT	17	immersion	1	G
243a99aa-212e-463a-aabc-2ecf2f049444.txt	1	sGJT	4	immersion	1	G
243a99aa-212e-463a-aabc-2ecf2f049444.txt	1	sGJT	7	immersion	1	G
243a99aa-212e-463a-aabc-2ecf2f049444.txt	1	sGJT	22	immersion	1	G
243a99aa-212e-463a-aabc-2ecf2f049444.txt	1	sGJT	25	immersion	1	G
243a99aa-212e-463a-aabc-2ecf2f049444.txt	1	sGJT	31	immersion	1	U
243a99aa-212e-463a-aabc-2ecf2f049444.txt	1	sGJT	30	immersion	1	U
2595f790-0c48-4c99-873e-f048ead2b1fe.txt	1	sGJT	9	native	1	G
2595f790-0c48-4c99-873e-f048ead2b1fe.txt	1	sGJT	18	native	1	U
2595f790-0c48-4c99-873e-f048ead2b1fe.txt	1	sGJT	33	native	1	U
2595f790-0c48-4c99-873e-f048ead2b1fe.txt	1	sGJT	6	native	1	G
2595f790-0c48-4c99-873e-f048ead2b1fe.txt	1	sGJT	25	native	1	G
2595f790-0c48-4c99-873e-f048ead2b1fe.txt	1	sGJT	29	native	1	U
2595f790-0c48-4c99-873e-f048ead2b1fe.txt	1	sGJT	36	native	1	G
2595f790-0c48-4c99-873e-f048ead2b1fe.txt	1	sGJT	10	native	1	U
2595f790-0c48-4c99-873e-f048ead2b1fe.txt	1	sGJT	3	native	1	G
2595f790-0c48-4c99-873e-f048ead2b1fe.txt	1	sGJT	21	native	1	G
2595f790-0c48-4c99-873e-f048ead2b1fe.txt	1	sGJT	18	native	1	G
2595f790-0c48-4c99-873e-f048ead2b1fe.txt	1	sGJT	2	native	1	U
2595f790-0c48-4c99-873e-f048ead2b1fe.txt	1	sGJT	38	native	1	G
2595f790-0c48-4c99-873e-f048ead2b1fe.txt	1	sGJT	23	native	1	G
2595f790-0c48-4c99-873e-f048ead2b1fe.txt	1	sGJT	40	native	1	U
2595f790-0c48-4c99-873e-f048ead2b1fe.txt	0	sGJT	40	native	1	G
2595f790-0c48-4c99-873e-f048ead2b1fe.txt	1	sGJT	34	native	1	G
2595f790-0c48-4c99-873e-f048ead2b1fe.txt	1	sGJT	7	native	1	U
2595f790-0c48-4c99-873e-f048ead2b1fe.txt	1	sGJT	23	native	1	U
2595f790-0c48-4c99-873e-f048ead2b1fe.txt	1	sGJT	29	native	1	G
2595f790-0c48-4c99-873e-f048ead2b1fe.txt	1	sGJT	39	native	1	G
2595f790-0c48-4c99-873e-f048ead2b1fe.txt	1	sGJT	31	native	1	G
2595f790-0c48-4c99-873e-f048ead2b1fe.txt	1	sGJT	25	native	1	U
2595f790-0c48-4c99-873e-f048ead2b1fe.txt	1	sGJT	24	native	1	G
2595f790-0c48-4c99-873e-f048ead2b1fe.txt	1	sGJT	4	native	1	G
2595f790-0c48-4c99-873e-f048ead2b1fe.txt	1	sGJT	21	native	1	U
2595f790-0c48-4c99-873e-f048ead2b1fe.txt	1	sGJT	26	native	1	U
2595f790-0c48-4c99-873e-f048ead2b1fe.txt	1	sGJT	2	native	1	G
2595f790-0c48-4c99-873e-f048ead2b1fe.txt	1	sGJT	12	native	1	G
2595f790-0c48-4c99-873e-f048ead2b1fe.txt	0	sGJT	16	native	1	U
2595f790-0c48-4c99-873e-f048ead2b1fe.txt	1	sGJT	7	native	1	G
2595f790-0c48-4c99-873e-f048ead2b1fe.txt	1	sGJT	14	native	1	U
2595f790-0c48-4c99-873e-f048ead2b1fe.txt	1	sGJT	8	native	1	G
2595f790-0c48-4c99-873e-f048ead2b1fe.txt	1	sGJT	37	native	1	G
2595f790-0c48-4c99-873e-f048ead2b1fe.txt	1	sGJT	27	native	1	G
2595f790-0c48-4c99-873e-f048ead2b1fe.txt	0	sGJT	37	native	1	U
2595f790-0c48-4c99-873e-f048ead2b1fe.txt	1	sGJT	13	native	1	G
2595f790-0c48-4c99-873e-f048ead2b1fe.txt	1	sGJT	35	native	1	G
2595f790-0c48-4c99-873e-f048ead2b1fe.txt	1	sGJT	22	native	1	G
2595f790-0c48-4c99-873e-f048ead2b1fe.txt	1	sGJT	3	native	1	U
2595f790-0c48-4c99-873e-f048ead2b1fe.txt	1	sGJT	17	native	1	G
2595f790-0c48-4c99-873e-f048ead2b1fe.txt	0	sGJT	11	native	1	G
2595f790-0c48-4c99-873e-f048ead2b1fe.txt	1	sGJT	32	native	1	G
2595f790-0c48-4c99-873e-f048ead2b1fe.txt	1	sGJT	5	native	1	U
2595f790-0c48-4c99-873e-f048ead2b1fe.txt	1	sGJT	35	native	1	U
2595f790-0c48-4c99-873e-f048ead2b1fe.txt	1	sGJT	8	native	1	U
2595f790-0c48-4c99-873e-f048ead2b1fe.txt	1	sGJT	34	native	1	U
2595f790-0c48-4c99-873e-f048ead2b1fe.txt	1	sGJT	24	native	1	U
2595f790-0c48-4c99-873e-f048ead2b1fe.txt	1	sGJT	17	native	1	U
2595f790-0c48-4c99-873e-f048ead2b1fe.txt	1	sGJT	31	native	1	U
2595f790-0c48-4c99-873e-f048ead2b1fe.txt	1	sGJT	32	native	1	U
2595f790-0c48-4c99-873e-f048ead2b1fe.txt	1	sGJT	27	native	1	U
2595f790-0c48-4c99-873e-f048ead2b1fe.txt	0	sGJT	13	native	1	U
2595f790-0c48-4c99-873e-f048ead2b1fe.txt	1	sGJT	19	native	1	U
2595f790-0c48-4c99-873e-f048ead2b1fe.txt	1	sGJT	26	native	1	G
2595f790-0c48-4c99-873e-f048ead2b1fe.txt	1	sGJT	16	native	1	G
2595f790-0c48-4c99-873e-f048ead2b1fe.txt	1	sGJT	30	native	1	U
2595f790-0c48-4c99-873e-f048ead2b1fe.txt	1	sGJT	20	native	1	G
2595f790-0c48-4c99-873e-f048ead2b1fe.txt	1	sGJT	20	native	1	U
2595f790-0c48-4c99-873e-f048ead2b1fe.txt	1	sGJT	9	native	1	U
2595f790-0c48-4c99-873e-f048ead2b1fe.txt	1	sGJT	6	native	1	U
2595f790-0c48-4c99-873e-f048ead2b1fe.txt	1	sGJT	15	native	1	G
2595f790-0c48-4c99-873e-f048ead2b1fe.txt	1	sGJT	28	native	1	U
2595f790-0c48-4c99-873e-f048ead2b1fe.txt	1	sGJT	19	native	1	G
2595f790-0c48-4c99-873e-f048ead2b1fe.txt	1	sGJT	1	native	1	G
2595f790-0c48-4c99-873e-f048ead2b1fe.txt	0	sGJT	36	native	1	U
2595f790-0c48-4c99-873e-f048ead2b1fe.txt	1	sGJT	1	native	1	U
2595f790-0c48-4c99-873e-f048ead2b1fe.txt	1	sGJT	30	native	1	G
2595f790-0c48-4c99-873e-f048ead2b1fe.txt	1	sGJT	33	native	1	G
2595f790-0c48-4c99-873e-f048ead2b1fe.txt	1	sGJT	5	native	1	G
2595f790-0c48-4c99-873e-f048ead2b1fe.txt	1	sGJT	28	native	1	G
2595f790-0c48-4c99-873e-f048ead2b1fe.txt	1	sGJT	39	native	1	U
2595f790-0c48-4c99-873e-f048ead2b1fe.txt	1	sGJT	11	native	1	U
2595f790-0c48-4c99-873e-f048ead2b1fe.txt	1	sGJT	10	native	1	G
2595f790-0c48-4c99-873e-f048ead2b1fe.txt	1	sGJT	38	native	1	U
2595f790-0c48-4c99-873e-f048ead2b1fe.txt	0	sGJT	15	native	1	U
2595f790-0c48-4c99-873e-f048ead2b1fe.txt	1	sGJT	4	native	1	U
2595f790-0c48-4c99-873e-f048ead2b1fe.txt	1	sGJT	12	native	1	U
2595f790-0c48-4c99-873e-f048ead2b1fe.txt	1	sGJT	14	native	1	G
268d16f7-e74e-4287-a6e9-c3cb3d1bf10d.txt	0	sGJT	15	native	1	U
268d16f7-e74e-4287-a6e9-c3cb3d1bf10d.txt	1	sGJT	7	native	1	U
268d16f7-e74e-4287-a6e9-c3cb3d1bf10d.txt	1	sGJT	14	native	1	U
268d16f7-e74e-4287-a6e9-c3cb3d1bf10d.txt	1	sGJT	35	native	1	G
268d16f7-e74e-4287-a6e9-c3cb3d1bf10d.txt	1	sGJT	25	native	1	G
268d16f7-e74e-4287-a6e9-c3cb3d1bf10d.txt	1	sGJT	23	native	1	G
268d16f7-e74e-4287-a6e9-c3cb3d1bf10d.txt	1	sGJT	28	native	1	U
268d16f7-e74e-4287-a6e9-c3cb3d1bf10d.txt	1	sGJT	19	native	1	U
268d16f7-e74e-4287-a6e9-c3cb3d1bf10d.txt	1	sGJT	9	native	1	U
268d16f7-e74e-4287-a6e9-c3cb3d1bf10d.txt	1	sGJT	3	native	1	G
268d16f7-e74e-4287-a6e9-c3cb3d1bf10d.txt	1	sGJT	10	native	1	U
268d16f7-e74e-4287-a6e9-c3cb3d1bf10d.txt	1	sGJT	34	native	1	G
268d16f7-e74e-4287-a6e9-c3cb3d1bf10d.txt	1	sGJT	21	native	1	G
268d16f7-e74e-4287-a6e9-c3cb3d1bf10d.txt	1	sGJT	6	native	1	G
268d16f7-e74e-4287-a6e9-c3cb3d1bf10d.txt	1	sGJT	39	native	1	U
268d16f7-e74e-4287-a6e9-c3cb3d1bf10d.txt	1	sGJT	4	native	1	G
268d16f7-e74e-4287-a6e9-c3cb3d1bf10d.txt	1	sGJT	20	native	1	G
268d16f7-e74e-4287-a6e9-c3cb3d1bf10d.txt	1	sGJT	3	native	1	U
268d16f7-e74e-4287-a6e9-c3cb3d1bf10d.txt	1	sGJT	35	native	1	U
268d16f7-e74e-4287-a6e9-c3cb3d1bf10d.txt	1	sGJT	27	native	1	U
268d16f7-e74e-4287-a6e9-c3cb3d1bf10d.txt	1	sGJT	30	native	1	U
268d16f7-e74e-4287-a6e9-c3cb3d1bf10d.txt	1	sGJT	16	native	1	G
268d16f7-e74e-4287-a6e9-c3cb3d1bf10d.txt	1	sGJT	36	native	1	U
268d16f7-e74e-4287-a6e9-c3cb3d1bf10d.txt	1	sGJT	11	native	1	U
268d16f7-e74e-4287-a6e9-c3cb3d1bf10d.txt	1	sGJT	30	native	1	G
268d16f7-e74e-4287-a6e9-c3cb3d1bf10d.txt	1	sGJT	26	native	1	U
268d16f7-e74e-4287-a6e9-c3cb3d1bf10d.txt	1	sGJT	13	native	1	G
268d16f7-e74e-4287-a6e9-c3cb3d1bf10d.txt	1	sGJT	22	native	1	G
268d16f7-e74e-4287-a6e9-c3cb3d1bf10d.txt	1	sGJT	5	native	1	U
268d16f7-e74e-4287-a6e9-c3cb3d1bf10d.txt	1	sGJT	23	native	1	U
268d16f7-e74e-4287-a6e9-c3cb3d1bf10d.txt	1	sGJT	40	native	1	U
268d16f7-e74e-4287-a6e9-c3cb3d1bf10d.txt	1	sGJT	2	native	1	G
268d16f7-e74e-4287-a6e9-c3cb3d1bf10d.txt	1	sGJT	13	native	1	U
268d16f7-e74e-4287-a6e9-c3cb3d1bf10d.txt	1	sGJT	8	native	1	U
268d16f7-e74e-4287-a6e9-c3cb3d1bf10d.txt	1	sGJT	38	native	1	U
268d16f7-e74e-4287-a6e9-c3cb3d1bf10d.txt	1	sGJT	32	native	1	G
268d16f7-e74e-4287-a6e9-c3cb3d1bf10d.txt	1	sGJT	33	native	1	G
268d16f7-e74e-4287-a6e9-c3cb3d1bf10d.txt	1	sGJT	31	native	1	U
268d16f7-e74e-4287-a6e9-c3cb3d1bf10d.txt	1	sGJT	17	native	1	G
268d16f7-e74e-4287-a6e9-c3cb3d1bf10d.txt	1	sGJT	37	native	1	G
268d16f7-e74e-4287-a6e9-c3cb3d1bf10d.txt	1	sGJT	34	native	1	U
268d16f7-e74e-4287-a6e9-c3cb3d1bf10d.txt	1	sGJT	14	native	1	G
268d16f7-e74e-4287-a6e9-c3cb3d1bf10d.txt	1	sGJT	33	native	1	U
268d16f7-e74e-4287-a6e9-c3cb3d1bf10d.txt	1	sGJT	4	native	1	U
268d16f7-e74e-4287-a6e9-c3cb3d1bf10d.txt	0	sGJT	39	native	1	G
268d16f7-e74e-4287-a6e9-c3cb3d1bf10d.txt	1	sGJT	9	native	1	G
268d16f7-e74e-4287-a6e9-c3cb3d1bf10d.txt	1	sGJT	32	native	1	U
268d16f7-e74e-4287-a6e9-c3cb3d1bf10d.txt	1	sGJT	12	native	1	U
268d16f7-e74e-4287-a6e9-c3cb3d1bf10d.txt	1	sGJT	28	native	1	G
268d16f7-e74e-4287-a6e9-c3cb3d1bf10d.txt	1	sGJT	18	native	1	U
268d16f7-e74e-4287-a6e9-c3cb3d1bf10d.txt	1	sGJT	18	native	1	G
268d16f7-e74e-4287-a6e9-c3cb3d1bf10d.txt	1	sGJT	5	native	1	G
268d16f7-e74e-4287-a6e9-c3cb3d1bf10d.txt	1	sGJT	19	native	1	G
268d16f7-e74e-4287-a6e9-c3cb3d1bf10d.txt	1	sGJT	1	native	1	U
268d16f7-e74e-4287-a6e9-c3cb3d1bf10d.txt	1	sGJT	27	native	1	G
268d16f7-e74e-4287-a6e9-c3cb3d1bf10d.txt	1	sGJT	31	native	1	G
268d16f7-e74e-4287-a6e9-c3cb3d1bf10d.txt	0	sGJT	38	native	1	G
268d16f7-e74e-4287-a6e9-c3cb3d1bf10d.txt	1	sGJT	1	native	1	G
268d16f7-e74e-4287-a6e9-c3cb3d1bf10d.txt	1	sGJT	24	native	1	G
268d16f7-e74e-4287-a6e9-c3cb3d1bf10d.txt	1	sGJT	26	native	1	G
268d16f7-e74e-4287-a6e9-c3cb3d1bf10d.txt	1	sGJT	10	native	1	G
268d16f7-e74e-4287-a6e9-c3cb3d1bf10d.txt	1	sGJT	15	native	1	G
268d16f7-e74e-4287-a6e9-c3cb3d1bf10d.txt	1	sGJT	29	native	1	U
268d16f7-e74e-4287-a6e9-c3cb3d1bf10d.txt	1	sGJT	17	native	1	U
268d16f7-e74e-4287-a6e9-c3cb3d1bf10d.txt	1	sGJT	2	native	1	U
268d16f7-e74e-4287-a6e9-c3cb3d1bf10d.txt	1	sGJT	21	native	1	U
268d16f7-e74e-4287-a6e9-c3cb3d1bf10d.txt	1	sGJT	20	native	1	U
268d16f7-e74e-4287-a6e9-c3cb3d1bf10d.txt	1	sGJT	7	native	1	G
268d16f7-e74e-4287-a6e9-c3cb3d1bf10d.txt	1	sGJT	22	native	1	U
268d16f7-e74e-4287-a6e9-c3cb3d1bf10d.txt	1	sGJT	16	native	1	U
268d16f7-e74e-4287-a6e9-c3cb3d1bf10d.txt	1	sGJT	25	native	1	U
268d16f7-e74e-4287-a6e9-c3cb3d1bf10d.txt	1	sGJT	37	native	1	U
268d16f7-e74e-4287-a6e9-c3cb3d1bf10d.txt	1	sGJT	29	native	1	G
268d16f7-e74e-4287-a6e9-c3cb3d1bf10d.txt	1	sGJT	6	native	1	U
268d16f7-e74e-4287-a6e9-c3cb3d1bf10d.txt	1	sGJT	8	native	1	G
268d16f7-e74e-4287-a6e9-c3cb3d1bf10d.txt	1	sGJT	11	native	1	G
268d16f7-e74e-4287-a6e9-c3cb3d1bf10d.txt	1	sGJT	12	native	1	G
268d16f7-e74e-4287-a6e9-c3cb3d1bf10d.txt	0	sGJT	36	native	1	G
268d16f7-e74e-4287-a6e9-c3cb3d1bf10d.txt	0	sGJT	40	native	1	G
268d16f7-e74e-4287-a6e9-c3cb3d1bf10d.txt	1	sGJT	24	native	1	U
27f76b5b-9e67-49d3-95fa-8e4d1288dbe5.txt	1	sGJT	13	native	1	G
27f76b5b-9e67-49d3-95fa-8e4d1288dbe5.txt	1	sGJT	34	native	1	U
27f76b5b-9e67-49d3-95fa-8e4d1288dbe5.txt	1	sGJT	7	native	1	G
27f76b5b-9e67-49d3-95fa-8e4d1288dbe5.txt	1	sGJT	24	native	1	U
27f76b5b-9e67-49d3-95fa-8e4d1288dbe5.txt	1	sGJT	14	native	1	U
27f76b5b-9e67-49d3-95fa-8e4d1288dbe5.txt	0	sGJT	20	native	1	U
27f76b5b-9e67-49d3-95fa-8e4d1288dbe5.txt	1	sGJT	7	native	1	U
27f76b5b-9e67-49d3-95fa-8e4d1288dbe5.txt	1	sGJT	27	native	1	U
27f76b5b-9e67-49d3-95fa-8e4d1288dbe5.txt	1	sGJT	32	native	1	U
27f76b5b-9e67-49d3-95fa-8e4d1288dbe5.txt	1	sGJT	31	native	1	U
27f76b5b-9e67-49d3-95fa-8e4d1288dbe5.txt	1	sGJT	37	native	1	U
27f76b5b-9e67-49d3-95fa-8e4d1288dbe5.txt	1	sGJT	5	native	1	G
27f76b5b-9e67-49d3-95fa-8e4d1288dbe5.txt	1	sGJT	9	native	1	U
27f76b5b-9e67-49d3-95fa-8e4d1288dbe5.txt	1	sGJT	26	native	1	G
27f76b5b-9e67-49d3-95fa-8e4d1288dbe5.txt	1	sGJT	20	native	1	G
27f76b5b-9e67-49d3-95fa-8e4d1288dbe5.txt	1	sGJT	36	native	1	G
27f76b5b-9e67-49d3-95fa-8e4d1288dbe5.txt	1	sGJT	10	native	1	G
27f76b5b-9e67-49d3-95fa-8e4d1288dbe5.txt	1	sGJT	33	native	1	U
27f76b5b-9e67-49d3-95fa-8e4d1288dbe5.txt	1	sGJT	21	native	1	U
27f76b5b-9e67-49d3-95fa-8e4d1288dbe5.txt	1	sGJT	18	native	1	U
27f76b5b-9e67-49d3-95fa-8e4d1288dbe5.txt	1	sGJT	27	native	1	G
27f76b5b-9e67-49d3-95fa-8e4d1288dbe5.txt	0	sGJT	23	native	1	G
27f76b5b-9e67-49d3-95fa-8e4d1288dbe5.txt	1	sGJT	30	native	1	U
27f76b5b-9e67-49d3-95fa-8e4d1288dbe5.txt	1	sGJT	28	native	1	G
27f76b5b-9e67-49d3-95fa-8e4d1288dbe5.txt	1	sGJT	40	native	1	U
27f76b5b-9e67-49d3-95fa-8e4d1288dbe5.txt	1	sGJT	5	native	1	U
27f76b5b-9e67-49d3-95fa-8e4d1288dbe5.txt	1	sGJT	28	native	1	U
27f76b5b-9e67-49d3-95fa-8e4d1288dbe5.txt	1	sGJT	29	native	1	U
27f76b5b-9e67-49d3-95fa-8e4d1288dbe5.txt	1	sGJT	31	native	1	G
27f76b5b-9e67-49d3-95fa-8e4d1288dbe5.txt	1	sGJT	1	native	1	G
27f76b5b-9e67-49d3-95fa-8e4d1288dbe5.txt	1	sGJT	2	native	1	U
27f76b5b-9e67-49d3-95fa-8e4d1288dbe5.txt	1	sGJT	12	native	1	U
27f76b5b-9e67-49d3-95fa-8e4d1288dbe5.txt	1	sGJT	3	native	1	U
27f76b5b-9e67-49d3-95fa-8e4d1288dbe5.txt	1	sGJT	34	native	1	G
27f76b5b-9e67-49d3-95fa-8e4d1288dbe5.txt	1	sGJT	19	native	1	G
27f76b5b-9e67-49d3-95fa-8e4d1288dbe5.txt	1	sGJT	4	native	1	U
27f76b5b-9e67-49d3-95fa-8e4d1288dbe5.txt	1	sGJT	30	native	1	G
27f76b5b-9e67-49d3-95fa-8e4d1288dbe5.txt	1	sGJT	33	native	1	G
27f76b5b-9e67-49d3-95fa-8e4d1288dbe5.txt	1	sGJT	17	native	1	G
27f76b5b-9e67-49d3-95fa-8e4d1288dbe5.txt	1	sGJT	15	native	1	U
27f76b5b-9e67-49d3-95fa-8e4d1288dbe5.txt	1	sGJT	26	native	1	U
27f76b5b-9e67-49d3-95fa-8e4d1288dbe5.txt	1	sGJT	35	native	1	G
27f76b5b-9e67-49d3-95fa-8e4d1288dbe5.txt	1	sGJT	8	native	1	U
27f76b5b-9e67-49d3-95fa-8e4d1288dbe5.txt	1	sGJT	19	native	1	U
27f76b5b-9e67-49d3-95fa-8e4d1288dbe5.txt	1	sGJT	17	native	1	U
27f76b5b-9e67-49d3-95fa-8e4d1288dbe5.txt	1	sGJT	8	native	1	G
27f76b5b-9e67-49d3-95fa-8e4d1288dbe5.txt	1	sGJT	22	native	1	U
27f76b5b-9e67-49d3-95fa-8e4d1288dbe5.txt	1	sGJT	10	native	1	U
27f76b5b-9e67-49d3-95fa-8e4d1288dbe5.txt	1	sGJT	38	native	1	G
27f76b5b-9e67-49d3-95fa-8e4d1288dbe5.txt	1	sGJT	9	native	1	G
27f76b5b-9e67-49d3-95fa-8e4d1288dbe5.txt	1	sGJT	24	native	1	G
27f76b5b-9e67-49d3-95fa-8e4d1288dbe5.txt	1	sGJT	6	native	1	U
27f76b5b-9e67-49d3-95fa-8e4d1288dbe5.txt	1	sGJT	39	native	1	U
27f76b5b-9e67-49d3-95fa-8e4d1288dbe5.txt	1	sGJT	16	native	1	G
27f76b5b-9e67-49d3-95fa-8e4d1288dbe5.txt	1	sGJT	11	native	1	G
27f76b5b-9e67-49d3-95fa-8e4d1288dbe5.txt	1	sGJT	6	native	1	G
27f76b5b-9e67-49d3-95fa-8e4d1288dbe5.txt	1	sGJT	32	native	1	G
27f76b5b-9e67-49d3-95fa-8e4d1288dbe5.txt	1	sGJT	22	native	1	G
27f76b5b-9e67-49d3-95fa-8e4d1288dbe5.txt	1	sGJT	15	native	1	G
27f76b5b-9e67-49d3-95fa-8e4d1288dbe5.txt	1	sGJT	11	native	1	U
27f76b5b-9e67-49d3-95fa-8e4d1288dbe5.txt	1	sGJT	18	native	1	G
27f76b5b-9e67-49d3-95fa-8e4d1288dbe5.txt	1	sGJT	3	native	1	G
27f76b5b-9e67-49d3-95fa-8e4d1288dbe5.txt	1	sGJT	1	native	1	U
27f76b5b-9e67-49d3-95fa-8e4d1288dbe5.txt	0	sGJT	23	native	1	U
27f76b5b-9e67-49d3-95fa-8e4d1288dbe5.txt	1	sGJT	4	native	1	G
27f76b5b-9e67-49d3-95fa-8e4d1288dbe5.txt	1	sGJT	21	native	1	G
27f76b5b-9e67-49d3-95fa-8e4d1288dbe5.txt	1	sGJT	16	native	1	U
27f76b5b-9e67-49d3-95fa-8e4d1288dbe5.txt	1	sGJT	38	native	1	U
27f76b5b-9e67-49d3-95fa-8e4d1288dbe5.txt	1	sGJT	25	native	1	U
27f76b5b-9e67-49d3-95fa-8e4d1288dbe5.txt	1	sGJT	39	native	1	G
27f76b5b-9e67-49d3-95fa-8e4d1288dbe5.txt	1	sGJT	25	native	1	G
27f76b5b-9e67-49d3-95fa-8e4d1288dbe5.txt	1	sGJT	12	native	1	G
27f76b5b-9e67-49d3-95fa-8e4d1288dbe5.txt	1	sGJT	35	native	1	U
27f76b5b-9e67-49d3-95fa-8e4d1288dbe5.txt	0	sGJT	40	native	1	G
27f76b5b-9e67-49d3-95fa-8e4d1288dbe5.txt	1	sGJT	2	native	1	G
27f76b5b-9e67-49d3-95fa-8e4d1288dbe5.txt	1	sGJT	14	native	1	G
27f76b5b-9e67-49d3-95fa-8e4d1288dbe5.txt	1	sGJT	29	native	1	G
27f76b5b-9e67-49d3-95fa-8e4d1288dbe5.txt	0	sGJT	37	native	1	G
27f76b5b-9e67-49d3-95fa-8e4d1288dbe5.txt	1	sGJT	36	native	1	U
28836aee-1cc0-4561-aa20-9dd5a7d36a3d.txt	0	sGJT	6	immersion	1	U
28836aee-1cc0-4561-aa20-9dd5a7d36a3d.txt	0	sGJT	21	immersion	1	U
28836aee-1cc0-4561-aa20-9dd5a7d36a3d.txt	1	sGJT	31	immersion	1	G
28836aee-1cc0-4561-aa20-9dd5a7d36a3d.txt	0	sGJT	5	immersion	1	U
28836aee-1cc0-4561-aa20-9dd5a7d36a3d.txt	1	sGJT	7	immersion	1	G
28836aee-1cc0-4561-aa20-9dd5a7d36a3d.txt	1	sGJT	2	immersion	1	U
28836aee-1cc0-4561-aa20-9dd5a7d36a3d.txt	1	sGJT	40	immersion	1	U
28836aee-1cc0-4561-aa20-9dd5a7d36a3d.txt	0	sGJT	7	immersion	1	U
28836aee-1cc0-4561-aa20-9dd5a7d36a3d.txt	1	sGJT	30	immersion	1	U
28836aee-1cc0-4561-aa20-9dd5a7d36a3d.txt	1	sGJT	4	immersion	1	U
28836aee-1cc0-4561-aa20-9dd5a7d36a3d.txt	1	sGJT	11	immersion	1	G
28836aee-1cc0-4561-aa20-9dd5a7d36a3d.txt	1	sGJT	8	immersion	1	U
28836aee-1cc0-4561-aa20-9dd5a7d36a3d.txt	1	sGJT	3	immersion	1	U
28836aee-1cc0-4561-aa20-9dd5a7d36a3d.txt	1	sGJT	17	immersion	1	U
28836aee-1cc0-4561-aa20-9dd5a7d36a3d.txt	1	sGJT	25	immersion	1	G
28836aee-1cc0-4561-aa20-9dd5a7d36a3d.txt	1	sGJT	11	immersion	1	U
28836aee-1cc0-4561-aa20-9dd5a7d36a3d.txt	1	sGJT	12	immersion	1	G
28836aee-1cc0-4561-aa20-9dd5a7d36a3d.txt	1	sGJT	26	immersion	1	G
28836aee-1cc0-4561-aa20-9dd5a7d36a3d.txt	0	sGJT	13	immersion	1	U
28836aee-1cc0-4561-aa20-9dd5a7d36a3d.txt	1	sGJT	1	immersion	1	G
28836aee-1cc0-4561-aa20-9dd5a7d36a3d.txt	1	sGJT	31	immersion	1	U
28836aee-1cc0-4561-aa20-9dd5a7d36a3d.txt	1	sGJT	22	immersion	1	U
28836aee-1cc0-4561-aa20-9dd5a7d36a3d.txt	1	sGJT	34	immersion	1	G
28836aee-1cc0-4561-aa20-9dd5a7d36a3d.txt	1	sGJT	27	immersion	1	G
28836aee-1cc0-4561-aa20-9dd5a7d36a3d.txt	1	sGJT	30	immersion	1	G
28836aee-1cc0-4561-aa20-9dd5a7d36a3d.txt	1	sGJT	28	immersion	1	U
28836aee-1cc0-4561-aa20-9dd5a7d36a3d.txt	1	sGJT	20	immersion	1	U
28836aee-1cc0-4561-aa20-9dd5a7d36a3d.txt	1	sGJT	22	immersion	1	G
28836aee-1cc0-4561-aa20-9dd5a7d36a3d.txt	1	sGJT	15	immersion	1	G
28836aee-1cc0-4561-aa20-9dd5a7d36a3d.txt	1	sGJT	39	immersion	1	U
28836aee-1cc0-4561-aa20-9dd5a7d36a3d.txt	1	sGJT	13	immersion	1	G
28836aee-1cc0-4561-aa20-9dd5a7d36a3d.txt	1	sGJT	20	immersion	1	G
28836aee-1cc0-4561-aa20-9dd5a7d36a3d.txt	0	sGJT	33	immersion	1	G
28836aee-1cc0-4561-aa20-9dd5a7d36a3d.txt	0	sGJT	12	immersion	1	U
28836aee-1cc0-4561-aa20-9dd5a7d36a3d.txt	0	sGJT	27	immersion	1	U
28836aee-1cc0-4561-aa20-9dd5a7d36a3d.txt	1	sGJT	8	immersion	1	G
28836aee-1cc0-4561-aa20-9dd5a7d36a3d.txt	1	sGJT	40	immersion	1	G
28836aee-1cc0-4561-aa20-9dd5a7d36a3d.txt	1	sGJT	34	immersion	1	U
28836aee-1cc0-4561-aa20-9dd5a7d36a3d.txt	1	sGJT	35	immersion	1	G
28836aee-1cc0-4561-aa20-9dd5a7d36a3d.txt	0	sGJT	15	immersion	1	U
28836aee-1cc0-4561-aa20-9dd5a7d36a3d.txt	1	sGJT	38	immersion	1	U
28836aee-1cc0-4561-aa20-9dd5a7d36a3d.txt	0	sGJT	23	immersion	1	G
28836aee-1cc0-4561-aa20-9dd5a7d36a3d.txt	0	sGJT	26	immersion	1	U
28836aee-1cc0-4561-aa20-9dd5a7d36a3d.txt	1	sGJT	16	immersion	1	G
28836aee-1cc0-4561-aa20-9dd5a7d36a3d.txt	1	sGJT	5	immersion	1	G
28836aee-1cc0-4561-aa20-9dd5a7d36a3d.txt	1	sGJT	24	immersion	1	U
28836aee-1cc0-4561-aa20-9dd5a7d36a3d.txt	1	sGJT	17	immersion	1	G
28836aee-1cc0-4561-aa20-9dd5a7d36a3d.txt	1	sGJT	38	immersion	1	G
28836aee-1cc0-4561-aa20-9dd5a7d36a3d.txt	1	sGJT	37	immersion	1	U
28836aee-1cc0-4561-aa20-9dd5a7d36a3d.txt	1	sGJT	21	immersion	1	G
28836aee-1cc0-4561-aa20-9dd5a7d36a3d.txt	1	sGJT	6	immersion	1	G
28836aee-1cc0-4561-aa20-9dd5a7d36a3d.txt	1	sGJT	9	immersion	1	U
28836aee-1cc0-4561-aa20-9dd5a7d36a3d.txt	0	sGJT	1	immersion	1	U
28836aee-1cc0-4561-aa20-9dd5a7d36a3d.txt	1	sGJT	9	immersion	1	G
28836aee-1cc0-4561-aa20-9dd5a7d36a3d.txt	1	sGJT	23	immersion	1	U
28836aee-1cc0-4561-aa20-9dd5a7d36a3d.txt	0	sGJT	29	immersion	1	U
28836aee-1cc0-4561-aa20-9dd5a7d36a3d.txt	1	sGJT	18	immersion	1	G
28836aee-1cc0-4561-aa20-9dd5a7d36a3d.txt	0	sGJT	39	immersion	1	G
28836aee-1cc0-4561-aa20-9dd5a7d36a3d.txt	1	sGJT	10	immersion	1	U
28836aee-1cc0-4561-aa20-9dd5a7d36a3d.txt	1	sGJT	18	immersion	1	U
28836aee-1cc0-4561-aa20-9dd5a7d36a3d.txt	1	sGJT	10	immersion	1	G
28836aee-1cc0-4561-aa20-9dd5a7d36a3d.txt	1	sGJT	25	immersion	1	U
28836aee-1cc0-4561-aa20-9dd5a7d36a3d.txt	0	sGJT	24	immersion	1	G
28836aee-1cc0-4561-aa20-9dd5a7d36a3d.txt	1	sGJT	36	immersion	1	U
28836aee-1cc0-4561-aa20-9dd5a7d36a3d.txt	1	sGJT	4	immersion	1	G
28836aee-1cc0-4561-aa20-9dd5a7d36a3d.txt	1	sGJT	36	immersion	1	G
28836aee-1cc0-4561-aa20-9dd5a7d36a3d.txt	0	sGJT	19	immersion	1	U
28836aee-1cc0-4561-aa20-9dd5a7d36a3d.txt	1	sGJT	3	immersion	1	G
28836aee-1cc0-4561-aa20-9dd5a7d36a3d.txt	0	sGJT	28	immersion	1	G
28836aee-1cc0-4561-aa20-9dd5a7d36a3d.txt	1	sGJT	29	immersion	1	G
28836aee-1cc0-4561-aa20-9dd5a7d36a3d.txt	1	sGJT	35	immersion	1	U
28836aee-1cc0-4561-aa20-9dd5a7d36a3d.txt	1	sGJT	32	immersion	1	U
28836aee-1cc0-4561-aa20-9dd5a7d36a3d.txt	0	sGJT	14	immersion	1	G
28836aee-1cc0-4561-aa20-9dd5a7d36a3d.txt	1	sGJT	2	immersion	1	G
28836aee-1cc0-4561-aa20-9dd5a7d36a3d.txt	1	sGJT	32	immersion	1	G
28836aee-1cc0-4561-aa20-9dd5a7d36a3d.txt	1	sGJT	37	immersion	1	G
28836aee-1cc0-4561-aa20-9dd5a7d36a3d.txt	0	sGJT	14	immersion	1	U
28836aee-1cc0-4561-aa20-9dd5a7d36a3d.txt	0	sGJT	33	immersion	1	U
28836aee-1cc0-4561-aa20-9dd5a7d36a3d.txt	1	sGJT	19	immersion	1	G
28836aee-1cc0-4561-aa20-9dd5a7d36a3d.txt	1	sGJT	16	immersion	1	U
2929c2f7-97d1-4e2b-852d-1434325cc275.txt	0	sGJT	15	immersion	1	U
2929c2f7-97d1-4e2b-852d-1434325cc275.txt	1	sGJT	7	immersion	1	G
2929c2f7-97d1-4e2b-852d-1434325cc275.txt	1	sGJT	36	immersion	1	U
2929c2f7-97d1-4e2b-852d-1434325cc275.txt	1	sGJT	12	immersion	1	U
2929c2f7-97d1-4e2b-852d-1434325cc275.txt	1	sGJT	16	immersion	1	U
2929c2f7-97d1-4e2b-852d-1434325cc275.txt	0	sGJT	29	immersion	1	U
2929c2f7-97d1-4e2b-852d-1434325cc275.txt	1	sGJT	25	immersion	1	U
2929c2f7-97d1-4e2b-852d-1434325cc275.txt	1	sGJT	8	immersion	1	G
2929c2f7-97d1-4e2b-852d-1434325cc275.txt	1	sGJT	3	immersion	1	U
2929c2f7-97d1-4e2b-852d-1434325cc275.txt	1	sGJT	11	immersion	1	U
2929c2f7-97d1-4e2b-852d-1434325cc275.txt	1	sGJT	35	immersion	1	G
2929c2f7-97d1-4e2b-852d-1434325cc275.txt	1	sGJT	1	immersion	1	G
2929c2f7-97d1-4e2b-852d-1434325cc275.txt	1	sGJT	28	immersion	1	U
2929c2f7-97d1-4e2b-852d-1434325cc275.txt	1	sGJT	13	immersion	1	U
2929c2f7-97d1-4e2b-852d-1434325cc275.txt	1	sGJT	38	immersion	1	U
2929c2f7-97d1-4e2b-852d-1434325cc275.txt	1	sGJT	38	immersion	1	G
2929c2f7-97d1-4e2b-852d-1434325cc275.txt	1	sGJT	34	immersion	1	G
2929c2f7-97d1-4e2b-852d-1434325cc275.txt	0	sGJT	9	immersion	1	G
2929c2f7-97d1-4e2b-852d-1434325cc275.txt	1	sGJT	17	immersion	1	U
2929c2f7-97d1-4e2b-852d-1434325cc275.txt	1	sGJT	27	immersion	1	U
2929c2f7-97d1-4e2b-852d-1434325cc275.txt	0	sGJT	3	immersion	1	G
2929c2f7-97d1-4e2b-852d-1434325cc275.txt	1	sGJT	39	immersion	1	G
2929c2f7-97d1-4e2b-852d-1434325cc275.txt	1	sGJT	5	immersion	1	G
2929c2f7-97d1-4e2b-852d-1434325cc275.txt	1	sGJT	37	immersion	1	G
2929c2f7-97d1-4e2b-852d-1434325cc275.txt	1	sGJT	2	immersion	1	G
2929c2f7-97d1-4e2b-852d-1434325cc275.txt	1	sGJT	6	immersion	1	G
2929c2f7-97d1-4e2b-852d-1434325cc275.txt	1	sGJT	6	immersion	1	U
2929c2f7-97d1-4e2b-852d-1434325cc275.txt	1	sGJT	4	immersion	1	U
2929c2f7-97d1-4e2b-852d-1434325cc275.txt	1	sGJT	31	immersion	1	U
2929c2f7-97d1-4e2b-852d-1434325cc275.txt	1	sGJT	16	immersion	1	G
2929c2f7-97d1-4e2b-852d-1434325cc275.txt	1	sGJT	19	immersion	1	G
2929c2f7-97d1-4e2b-852d-1434325cc275.txt	1	sGJT	9	immersion	1	U
2929c2f7-97d1-4e2b-852d-1434325cc275.txt	1	sGJT	30	immersion	1	G
2929c2f7-97d1-4e2b-852d-1434325cc275.txt	1	sGJT	32	immersion	1	U
2929c2f7-97d1-4e2b-852d-1434325cc275.txt	1	sGJT	13	immersion	1	G
2929c2f7-97d1-4e2b-852d-1434325cc275.txt	1	sGJT	39	immersion	1	U
2929c2f7-97d1-4e2b-852d-1434325cc275.txt	1	sGJT	26	immersion	1	U
2929c2f7-97d1-4e2b-852d-1434325cc275.txt	1	sGJT	8	immersion	1	U
2929c2f7-97d1-4e2b-852d-1434325cc275.txt	0	sGJT	20	immersion	1	G
2929c2f7-97d1-4e2b-852d-1434325cc275.txt	1	sGJT	12	immersion	1	G
2929c2f7-97d1-4e2b-852d-1434325cc275.txt	1	sGJT	18	immersion	1	U
2929c2f7-97d1-4e2b-852d-1434325cc275.txt	1	sGJT	23	immersion	1	U
2929c2f7-97d1-4e2b-852d-1434325cc275.txt	1	sGJT	14	immersion	1	G
2929c2f7-97d1-4e2b-852d-1434325cc275.txt	1	sGJT	24	immersion	1	G
2929c2f7-97d1-4e2b-852d-1434325cc275.txt	1	sGJT	29	immersion	1	G
2929c2f7-97d1-4e2b-852d-1434325cc275.txt	1	sGJT	33	immersion	1	G
2929c2f7-97d1-4e2b-852d-1434325cc275.txt	1	sGJT	30	immersion	1	U
2929c2f7-97d1-4e2b-852d-1434325cc275.txt	1	sGJT	34	immersion	1	U
2929c2f7-97d1-4e2b-852d-1434325cc275.txt	1	sGJT	18	immersion	1	G
2929c2f7-97d1-4e2b-852d-1434325cc275.txt	1	sGJT	31	immersion	1	G
2929c2f7-97d1-4e2b-852d-1434325cc275.txt	0	sGJT	22	immersion	1	G
2929c2f7-97d1-4e2b-852d-1434325cc275.txt	1	sGJT	20	immersion	1	U
2929c2f7-97d1-4e2b-852d-1434325cc275.txt	1	sGJT	27	immersion	1	G
2929c2f7-97d1-4e2b-852d-1434325cc275.txt	1	sGJT	35	immersion	1	U
2929c2f7-97d1-4e2b-852d-1434325cc275.txt	1	sGJT	22	immersion	1	U
2929c2f7-97d1-4e2b-852d-1434325cc275.txt	1	sGJT	21	immersion	1	G
2929c2f7-97d1-4e2b-852d-1434325cc275.txt	1	sGJT	14	immersion	1	U
2929c2f7-97d1-4e2b-852d-1434325cc275.txt	1	sGJT	11	immersion	1	G
2929c2f7-97d1-4e2b-852d-1434325cc275.txt	1	sGJT	15	immersion	1	G
2929c2f7-97d1-4e2b-852d-1434325cc275.txt	1	sGJT	37	immersion	1	U
2929c2f7-97d1-4e2b-852d-1434325cc275.txt	1	sGJT	21	immersion	1	U
2929c2f7-97d1-4e2b-852d-1434325cc275.txt	1	sGJT	10	immersion	1	G
2929c2f7-97d1-4e2b-852d-1434325cc275.txt	1	sGJT	25	immersion	1	G
2929c2f7-97d1-4e2b-852d-1434325cc275.txt	0	sGJT	28	immersion	1	G
2929c2f7-97d1-4e2b-852d-1434325cc275.txt	1	sGJT	2	immersion	1	U
2929c2f7-97d1-4e2b-852d-1434325cc275.txt	1	sGJT	10	immersion	1	U
2929c2f7-97d1-4e2b-852d-1434325cc275.txt	0	sGJT	17	immersion	1	G
2929c2f7-97d1-4e2b-852d-1434325cc275.txt	1	sGJT	7	immersion	1	U
2929c2f7-97d1-4e2b-852d-1434325cc275.txt	1	sGJT	19	immersion	1	U
2929c2f7-97d1-4e2b-852d-1434325cc275.txt	1	sGJT	26	immersion	1	G
2929c2f7-97d1-4e2b-852d-1434325cc275.txt	1	sGJT	24	immersion	1	U
2929c2f7-97d1-4e2b-852d-1434325cc275.txt	1	sGJT	40	immersion	1	U
2929c2f7-97d1-4e2b-852d-1434325cc275.txt	1	sGJT	5	immersion	1	U
2929c2f7-97d1-4e2b-852d-1434325cc275.txt	1	sGJT	36	immersion	1	G
2929c2f7-97d1-4e2b-852d-1434325cc275.txt	1	sGJT	4	immersion	1	G
2929c2f7-97d1-4e2b-852d-1434325cc275.txt	1	sGJT	23	immersion	1	G
2929c2f7-97d1-4e2b-852d-1434325cc275.txt	1	sGJT	40	immersion	1	G
2929c2f7-97d1-4e2b-852d-1434325cc275.txt	1	sGJT	33	immersion	1	U
2929c2f7-97d1-4e2b-852d-1434325cc275.txt	1	sGJT	1	immersion	1	U
2929c2f7-97d1-4e2b-852d-1434325cc275.txt	1	sGJT	32	immersion	1	G
2afef8ae-d3de-4d4c-b149-00414d73a4b4.txt	0	sGJT	35	classroom	1	U
2afef8ae-d3de-4d4c-b149-00414d73a4b4.txt	1	sGJT	14	classroom	1	U
2afef8ae-d3de-4d4c-b149-00414d73a4b4.txt	1	sGJT	23	classroom	1	G
2afef8ae-d3de-4d4c-b149-00414d73a4b4.txt	1	sGJT	36	classroom	1	U
2afef8ae-d3de-4d4c-b149-00414d73a4b4.txt	1	sGJT	15	classroom	1	U
2afef8ae-d3de-4d4c-b149-00414d73a4b4.txt	1	sGJT	35	classroom	1	G
2afef8ae-d3de-4d4c-b149-00414d73a4b4.txt	1	sGJT	37	classroom	1	U
2afef8ae-d3de-4d4c-b149-00414d73a4b4.txt	0	sGJT	28	classroom	1	G
2afef8ae-d3de-4d4c-b149-00414d73a4b4.txt	1	sGJT	5	classroom	1	G
2afef8ae-d3de-4d4c-b149-00414d73a4b4.txt	1	sGJT	25	classroom	1	G
2afef8ae-d3de-4d4c-b149-00414d73a4b4.txt	1	sGJT	24	classroom	1	U
2afef8ae-d3de-4d4c-b149-00414d73a4b4.txt	0	sGJT	1	classroom	1	G
2afef8ae-d3de-4d4c-b149-00414d73a4b4.txt	1	sGJT	11	classroom	1	G
2afef8ae-d3de-4d4c-b149-00414d73a4b4.txt	1	sGJT	13	classroom	1	U
2afef8ae-d3de-4d4c-b149-00414d73a4b4.txt	1	sGJT	19	classroom	1	G
2afef8ae-d3de-4d4c-b149-00414d73a4b4.txt	1	sGJT	28	classroom	1	U
2afef8ae-d3de-4d4c-b149-00414d73a4b4.txt	0	sGJT	7	classroom	1	U
2afef8ae-d3de-4d4c-b149-00414d73a4b4.txt	1	sGJT	8	classroom	1	G
2afef8ae-d3de-4d4c-b149-00414d73a4b4.txt	1	sGJT	27	classroom	1	U
2afef8ae-d3de-4d4c-b149-00414d73a4b4.txt	1	sGJT	32	classroom	1	G
2afef8ae-d3de-4d4c-b149-00414d73a4b4.txt	1	sGJT	33	classroom	1	G
2afef8ae-d3de-4d4c-b149-00414d73a4b4.txt	1	sGJT	18	classroom	1	G
2afef8ae-d3de-4d4c-b149-00414d73a4b4.txt	1	sGJT	16	classroom	1	G
2afef8ae-d3de-4d4c-b149-00414d73a4b4.txt	1	sGJT	17	classroom	1	G
2afef8ae-d3de-4d4c-b149-00414d73a4b4.txt	1	sGJT	10	classroom	1	G
2afef8ae-d3de-4d4c-b149-00414d73a4b4.txt	1	sGJT	12	classroom	1	U
2afef8ae-d3de-4d4c-b149-00414d73a4b4.txt	1	sGJT	23	classroom	1	U
2afef8ae-d3de-4d4c-b149-00414d73a4b4.txt	0	sGJT	22	classroom	1	G
2afef8ae-d3de-4d4c-b149-00414d73a4b4.txt	1	sGJT	34	classroom	1	G
2afef8ae-d3de-4d4c-b149-00414d73a4b4.txt	1	sGJT	38	classroom	1	G
2afef8ae-d3de-4d4c-b149-00414d73a4b4.txt	0	sGJT	19	classroom	1	U
2afef8ae-d3de-4d4c-b149-00414d73a4b4.txt	1	sGJT	22	classroom	1	U
2afef8ae-d3de-4d4c-b149-00414d73a4b4.txt	0	sGJT	20	classroom	1	G
2afef8ae-d3de-4d4c-b149-00414d73a4b4.txt	1	sGJT	39	classroom	1	U
2afef8ae-d3de-4d4c-b149-00414d73a4b4.txt	0	sGJT	21	classroom	1	G
2afef8ae-d3de-4d4c-b149-00414d73a4b4.txt	1	sGJT	31	classroom	1	U
2afef8ae-d3de-4d4c-b149-00414d73a4b4.txt	1	sGJT	17	classroom	1	U
2afef8ae-d3de-4d4c-b149-00414d73a4b4.txt	1	sGJT	11	classroom	1	U
2afef8ae-d3de-4d4c-b149-00414d73a4b4.txt	1	sGJT	25	classroom	1	U
2afef8ae-d3de-4d4c-b149-00414d73a4b4.txt	1	sGJT	12	classroom	1	G
2afef8ae-d3de-4d4c-b149-00414d73a4b4.txt	1	sGJT	24	classroom	1	G
2afef8ae-d3de-4d4c-b149-00414d73a4b4.txt	1	sGJT	32	classroom	1	U
2afef8ae-d3de-4d4c-b149-00414d73a4b4.txt	1	sGJT	30	classroom	1	G
2afef8ae-d3de-4d4c-b149-00414d73a4b4.txt	1	sGJT	13	classroom	1	G
2afef8ae-d3de-4d4c-b149-00414d73a4b4.txt	1	sGJT	4	classroom	1	U
2afef8ae-d3de-4d4c-b149-00414d73a4b4.txt	1	sGJT	10	classroom	1	U
2afef8ae-d3de-4d4c-b149-00414d73a4b4.txt	1	sGJT	26	classroom	1	G
2afef8ae-d3de-4d4c-b149-00414d73a4b4.txt	0	sGJT	4	classroom	1	G
2afef8ae-d3de-4d4c-b149-00414d73a4b4.txt	1	sGJT	3	classroom	1	G
2afef8ae-d3de-4d4c-b149-00414d73a4b4.txt	1	sGJT	27	classroom	1	G
2afef8ae-d3de-4d4c-b149-00414d73a4b4.txt	0	sGJT	5	classroom	1	U
2afef8ae-d3de-4d4c-b149-00414d73a4b4.txt	1	sGJT	16	classroom	1	U
2afef8ae-d3de-4d4c-b149-00414d73a4b4.txt	1	sGJT	38	classroom	1	U
2afef8ae-d3de-4d4c-b149-00414d73a4b4.txt	1	sGJT	2	classroom	1	G
2afef8ae-d3de-4d4c-b149-00414d73a4b4.txt	1	sGJT	34	classroom	1	U
2afef8ae-d3de-4d4c-b149-00414d73a4b4.txt	1	sGJT	37	classroom	1	G
2afef8ae-d3de-4d4c-b149-00414d73a4b4.txt	1	sGJT	6	classroom	1	U
2afef8ae-d3de-4d4c-b149-00414d73a4b4.txt	1	sGJT	20	classroom	1	U
2afef8ae-d3de-4d4c-b149-00414d73a4b4.txt	1	sGJT	21	classroom	1	U
2afef8ae-d3de-4d4c-b149-00414d73a4b4.txt	1	sGJT	9	classroom	1	U
2afef8ae-d3de-4d4c-b149-00414d73a4b4.txt	1	sGJT	15	classroom	1	G
2afef8ae-d3de-4d4c-b149-00414d73a4b4.txt	1	sGJT	33	classroom	1	U
2afef8ae-d3de-4d4c-b149-00414d73a4b4.txt	1	sGJT	9	classroom	1	G
2afef8ae-d3de-4d4c-b149-00414d73a4b4.txt	1	sGJT	1	classroom	1	U
2afef8ae-d3de-4d4c-b149-00414d73a4b4.txt	1	sGJT	18	classroom	1	U
2afef8ae-d3de-4d4c-b149-00414d73a4b4.txt	1	sGJT	30	classroom	1	U
2afef8ae-d3de-4d4c-b149-00414d73a4b4.txt	1	sGJT	40	classroom	1	U
2afef8ae-d3de-4d4c-b149-00414d73a4b4.txt	1	sGJT	29	classroom	1	G
2afef8ae-d3de-4d4c-b149-00414d73a4b4.txt	1	sGJT	7	classroom	1	G
2afef8ae-d3de-4d4c-b149-00414d73a4b4.txt	1	sGJT	6	classroom	1	G
2afef8ae-d3de-4d4c-b149-00414d73a4b4.txt	0	sGJT	3	classroom	1	U
2afef8ae-d3de-4d4c-b149-00414d73a4b4.txt	1	sGJT	26	classroom	1	U
2afef8ae-d3de-4d4c-b149-00414d73a4b4.txt	1	sGJT	31	classroom	1	G
2afef8ae-d3de-4d4c-b149-00414d73a4b4.txt	1	sGJT	8	classroom	1	U
2afef8ae-d3de-4d4c-b149-00414d73a4b4.txt	1	sGJT	14	classroom	1	G
2afef8ae-d3de-4d4c-b149-00414d73a4b4.txt	1	sGJT	36	classroom	1	G
2afef8ae-d3de-4d4c-b149-00414d73a4b4.txt	1	sGJT	2	classroom	1	U
2b59f5fc-21c8-4909-987d-d7e749629ca3.txt	1	sGJT	2	native	1	G
2b59f5fc-21c8-4909-987d-d7e749629ca3.txt	1	sGJT	14	native	1	U
2b59f5fc-21c8-4909-987d-d7e749629ca3.txt	1	sGJT	17	native	1	G
2b59f5fc-21c8-4909-987d-d7e749629ca3.txt	1	sGJT	12	native	1	U
2b59f5fc-21c8-4909-987d-d7e749629ca3.txt	1	sGJT	3	native	1	G
2b59f5fc-21c8-4909-987d-d7e749629ca3.txt	1	sGJT	20	native	1	U
2b59f5fc-21c8-4909-987d-d7e749629ca3.txt	1	sGJT	10	native	1	G
2b59f5fc-21c8-4909-987d-d7e749629ca3.txt	1	sGJT	36	native	1	G
2b59f5fc-21c8-4909-987d-d7e749629ca3.txt	1	sGJT	7	native	1	U
2b59f5fc-21c8-4909-987d-d7e749629ca3.txt	1	sGJT	19	native	1	U
2b59f5fc-21c8-4909-987d-d7e749629ca3.txt	1	sGJT	15	native	1	G
2b59f5fc-21c8-4909-987d-d7e749629ca3.txt	1	sGJT	28	native	1	U
2b59f5fc-21c8-4909-987d-d7e749629ca3.txt	1	sGJT	38	native	1	G
2b59f5fc-21c8-4909-987d-d7e749629ca3.txt	1	sGJT	18	native	1	U
2b59f5fc-21c8-4909-987d-d7e749629ca3.txt	0	sGJT	22	native	1	U
2b59f5fc-21c8-4909-987d-d7e749629ca3.txt	1	sGJT	34	native	1	G
2b59f5fc-21c8-4909-987d-d7e749629ca3.txt	1	sGJT	39	native	1	U
2b59f5fc-21c8-4909-987d-d7e749629ca3.txt	1	sGJT	25	native	1	U
2b59f5fc-21c8-4909-987d-d7e749629ca3.txt	1	sGJT	8	native	1	U
2b59f5fc-21c8-4909-987d-d7e749629ca3.txt	1	sGJT	10	native	1	U
2b59f5fc-21c8-4909-987d-d7e749629ca3.txt	0	sGJT	40	native	1	U
2b59f5fc-21c8-4909-987d-d7e749629ca3.txt	1	sGJT	9	native	1	U
2b59f5fc-21c8-4909-987d-d7e749629ca3.txt	1	sGJT	3	native	1	U
2b59f5fc-21c8-4909-987d-d7e749629ca3.txt	1	sGJT	1	native	1	U
2b59f5fc-21c8-4909-987d-d7e749629ca3.txt	1	sGJT	29	native	1	G
2b59f5fc-21c8-4909-987d-d7e749629ca3.txt	1	sGJT	33	native	1	U
2b59f5fc-21c8-4909-987d-d7e749629ca3.txt	1	sGJT	11	native	1	U
2b59f5fc-21c8-4909-987d-d7e749629ca3.txt	1	sGJT	14	native	1	G
2b59f5fc-21c8-4909-987d-d7e749629ca3.txt	1	sGJT	22	native	1	G
2b59f5fc-21c8-4909-987d-d7e749629ca3.txt	1	sGJT	27	native	1	G
2b59f5fc-21c8-4909-987d-d7e749629ca3.txt	1	sGJT	29	native	1	U
2b59f5fc-21c8-4909-987d-d7e749629ca3.txt	0	sGJT	15	native	1	U
2b59f5fc-21c8-4909-987d-d7e749629ca3.txt	1	sGJT	35	native	1	G
2b59f5fc-21c8-4909-987d-d7e749629ca3.txt	1	sGJT	13	native	1	G
2b59f5fc-21c8-4909-987d-d7e749629ca3.txt	1	sGJT	17	native	1	U
2b59f5fc-21c8-4909-987d-d7e749629ca3.txt	1	sGJT	5	native	1	U
2b59f5fc-21c8-4909-987d-d7e749629ca3.txt	1	sGJT	25	native	1	G
2b59f5fc-21c8-4909-987d-d7e749629ca3.txt	1	sGJT	40	native	1	G
2b59f5fc-21c8-4909-987d-d7e749629ca3.txt	0	sGJT	30	native	1	G
2b59f5fc-21c8-4909-987d-d7e749629ca3.txt	1	sGJT	37	native	1	G
2b59f5fc-21c8-4909-987d-d7e749629ca3.txt	1	sGJT	27	native	1	U
2b59f5fc-21c8-4909-987d-d7e749629ca3.txt	1	sGJT	4	native	1	U
2b59f5fc-21c8-4909-987d-d7e749629ca3.txt	1	sGJT	32	native	1	U
2b59f5fc-21c8-4909-987d-d7e749629ca3.txt	1	sGJT	5	native	1	G
2b59f5fc-21c8-4909-987d-d7e749629ca3.txt	1	sGJT	24	native	1	U
2b59f5fc-21c8-4909-987d-d7e749629ca3.txt	1	sGJT	9	native	1	G
2b59f5fc-21c8-4909-987d-d7e749629ca3.txt	0	sGJT	36	native	1	U
2b59f5fc-21c8-4909-987d-d7e749629ca3.txt	1	sGJT	38	native	1	U
2b59f5fc-21c8-4909-987d-d7e749629ca3.txt	1	sGJT	6	native	1	U
2b59f5fc-21c8-4909-987d-d7e749629ca3.txt	1	sGJT	2	native	1	U
2b59f5fc-21c8-4909-987d-d7e749629ca3.txt	1	sGJT	32	native	1	G
2b59f5fc-21c8-4909-987d-d7e749629ca3.txt	1	sGJT	31	native	1	G
2b59f5fc-21c8-4909-987d-d7e749629ca3.txt	1	sGJT	34	native	1	U
2b59f5fc-21c8-4909-987d-d7e749629ca3.txt	1	sGJT	24	native	1	G
2b59f5fc-21c8-4909-987d-d7e749629ca3.txt	0	sGJT	23	native	1	U
2b59f5fc-21c8-4909-987d-d7e749629ca3.txt	1	sGJT	19	native	1	G
2b59f5fc-21c8-4909-987d-d7e749629ca3.txt	1	sGJT	13	native	1	U
2b59f5fc-21c8-4909-987d-d7e749629ca3.txt	1	sGJT	18	native	1	G
2b59f5fc-21c8-4909-987d-d7e749629ca3.txt	1	sGJT	6	native	1	G
2b59f5fc-21c8-4909-987d-d7e749629ca3.txt	0	sGJT	31	native	1	U
2b59f5fc-21c8-4909-987d-d7e749629ca3.txt	1	sGJT	7	native	1	G
2b59f5fc-21c8-4909-987d-d7e749629ca3.txt	1	sGJT	4	native	1	G
2b59f5fc-21c8-4909-987d-d7e749629ca3.txt	1	sGJT	16	native	1	G
2b59f5fc-21c8-4909-987d-d7e749629ca3.txt	1	sGJT	8	native	1	G
2b59f5fc-21c8-4909-987d-d7e749629ca3.txt	1	sGJT	1	native	1	G
2b59f5fc-21c8-4909-987d-d7e749629ca3.txt	1	sGJT	21	native	1	U
2b59f5fc-21c8-4909-987d-d7e749629ca3.txt	1	sGJT	35	native	1	U
2b59f5fc-21c8-4909-987d-d7e749629ca3.txt	1	sGJT	28	native	1	G
2b59f5fc-21c8-4909-987d-d7e749629ca3.txt	0	sGJT	16	native	1	U
2b59f5fc-21c8-4909-987d-d7e749629ca3.txt	1	sGJT	39	native	1	G
2b59f5fc-21c8-4909-987d-d7e749629ca3.txt	1	sGJT	30	native	1	U
2b59f5fc-21c8-4909-987d-d7e749629ca3.txt	1	sGJT	26	native	1	U
2b59f5fc-21c8-4909-987d-d7e749629ca3.txt	1	sGJT	23	native	1	G
2b59f5fc-21c8-4909-987d-d7e749629ca3.txt	1	sGJT	37	native	1	U
2b59f5fc-21c8-4909-987d-d7e749629ca3.txt	1	sGJT	21	native	1	G
2b59f5fc-21c8-4909-987d-d7e749629ca3.txt	1	sGJT	26	native	1	G
2b59f5fc-21c8-4909-987d-d7e749629ca3.txt	1	sGJT	20	native	1	G
2b59f5fc-21c8-4909-987d-d7e749629ca3.txt	1	sGJT	33	native	1	G
2b59f5fc-21c8-4909-987d-d7e749629ca3.txt	0	sGJT	12	native	1	G
2b59f5fc-21c8-4909-987d-d7e749629ca3.txt	1	sGJT	11	native	1	G
2bbf7556-2225-4f97-8fad-9cc3464b6cca.txt	1	sGJT	3	immersion	1	G
2bbf7556-2225-4f97-8fad-9cc3464b6cca.txt	1	sGJT	28	immersion	1	U
2bbf7556-2225-4f97-8fad-9cc3464b6cca.txt	1	sGJT	11	immersion	1	G
2bbf7556-2225-4f97-8fad-9cc3464b6cca.txt	1	sGJT	25	immersion	1	G
2bbf7556-2225-4f97-8fad-9cc3464b6cca.txt	0	sGJT	21	immersion	1	G
2bbf7556-2225-4f97-8fad-9cc3464b6cca.txt	1	sGJT	34	immersion	1	G
2bbf7556-2225-4f97-8fad-9cc3464b6cca.txt	1	sGJT	32	immersion	1	U
2bbf7556-2225-4f97-8fad-9cc3464b6cca.txt	1	sGJT	27	immersion	1	G
2bbf7556-2225-4f97-8fad-9cc3464b6cca.txt	0	sGJT	17	immersion	1	G
2bbf7556-2225-4f97-8fad-9cc3464b6cca.txt	1	sGJT	33	immersion	1	U
2bbf7556-2225-4f97-8fad-9cc3464b6cca.txt	1	sGJT	13	immersion	1	U
2bbf7556-2225-4f97-8fad-9cc3464b6cca.txt	1	sGJT	31	immersion	1	U
2bbf7556-2225-4f97-8fad-9cc3464b6cca.txt	1	sGJT	33	immersion	1	G
2bbf7556-2225-4f97-8fad-9cc3464b6cca.txt	1	sGJT	21	immersion	1	U
2bbf7556-2225-4f97-8fad-9cc3464b6cca.txt	1	sGJT	7	immersion	1	G
2bbf7556-2225-4f97-8fad-9cc3464b6cca.txt	1	sGJT	31	immersion	1	G
2bbf7556-2225-4f97-8fad-9cc3464b6cca.txt	1	sGJT	37	immersion	1	U
2bbf7556-2225-4f97-8fad-9cc3464b6cca.txt	1	sGJT	35	immersion	1	U
2bbf7556-2225-4f97-8fad-9cc3464b6cca.txt	1	sGJT	23	immersion	1	G
[truncated: 30,261 more rows]
