# Supplementary material for: Is Adult Second Language Acquisition Defective?
Source: Front Psychol. 2020 Jul 30;11:1839. doi: 10.3389/fpsyg.2020.01839 (PMC7409517; doi:10.3389/fpsyg.2020.01839)
Supplement: Supplementary file 1 [file Data_Sheet_1.ZIP › df-summary.csv]

participant	age	gender	occupation	matchid	edu	native	native_lang	lang_subfamily	lang_family	first_exp	eng_edu	LoR	AoA	variety	group	score_sp	mean_rt_sp	score_wr	mean_rt_wr	score_ps	mean_rt_ps
00265018-0164-4417-8664-6eedd7839004.txt	27	f	student	9	18	non-native	Estonian	FinnoUgric	non-IndoEuropean	8	2280	48	22	British	immersion	77	554.8550725	74	2646.142857	76	3972.275362
04f9b338-5c6e-47da-9257-32234505c9ba.txt	39	m	english	14	16	native	English	English	IndoEuropean	0	NA	468	0	Other	native	65	500.9615385	67	1995.655738	74	4916.819444
0ab92491-3f45-4510-931f-b50f1db260ff.txt	64	f	english	34	17	non-native	Polish	Slavic	IndoEuropean	15	3420	384	32	Other	immersion	68	725.3709677	73	2417.6	71	5044.242857
0bb95291-81d9-409d-9af2-27773224bef9.txt	38	f	language	14	15	non-native	Portuguese	Romance	IndoEuropean	10	NA	0	NA	British	classroom	46	2002.302326	55	5535.072727	71	7089.181818
0be0fad6-c464-4f26-aeba-c671e3e0f840.txt	54	f	education	38	17	non-native	Spanish	Romance	IndoEuropean	6	1638	0	NA	British	classroom	59	819.84	67	3566.047619	79	5452.25974
0e0b338e-b361-409d-a2e2-415b77dbcf9b.txt	37	f	unemployed	20	15	native	English	English	IndoEuropean	0	NA	NA	NA	American	native	75	313	68	1672.046875	79	4731.987013
0f526e50-3ef8-4e43-8c1f-c1cc081e8deb.txt	40	m	english	40	17	native	English	English	IndoEuropean	0	NA	NA	NA	British	native	74	780.9552239	78	2864.246753	78	5912.069444
10664d5f-17eb-4fd2-babf-f230bec45ea3.txt	45	f	education	15	17	non-native	Italian	Romance	IndoEuropean	14	900	2	21	British	classroom	70	333.9333333	70	2586.637681	77	5893.485294
10f8844a-3df1-4a48-8446-e41690822db9.txt	49	m	education	30	20	native	English	English	IndoEuropean	0	NA	NA	NA	British	native	75	277.4516129	72	1768.577465	74	4826.794118
1484b2a6-5fd9-49c5-865e-28ff2eab720c.txt	52	m	high	44	15	non-native	Greek	Greek	IndoEuropean	9	1296	0	NA	American	classroom	40	1157.638889	59	3576.508475	78	6328.097222
159a7f2e-dd6c-4288-827e-aadf0f7b3567.txt	32	f	education	10	12	non-native	Serbian	Slavic	IndoEuropean	10	1224	0	NA	American	classroom	60	602.08	65	2199.774194	72	4205.3125
182675ba-faaa-4e24-9eb5-3e8daae0fa9d.txt	65	f	other	28	15	non-native	German	WestGermanic	IndoEuropean	10	NA	108	35	British	immersion	75	702.8923077	75	2996.567568	76	10974.67105
1aac51e2-89e2-4bf7-a782-5bb443502996.txt	61	f	retired	45	15	native	English	English	IndoEuropean	0	NA	NA	NA	British	native	78	950.0555556	77	3252.948052	76	9083.194444
1b3180a8-40c6-459b-8acb-9196ccd08920.txt	31	f	student	35	17	non-native	Italian	Romance	IndoEuropean	6	12492	132	20	British	immersion	73	608.4925373	76	2314.444444	75	5179.69863
1c3424ac-7368-4c3a-8bec-bbf83bc5d59d.txt	28	f	student	31	14.5	non-native	Italian	Romance	IndoEuropean	8	1008	0	NA	British	classroom	52	1427.865385	66	3546.075758	80	6709.216216
1fd07820-2081-4324-a328-437795eca2c6.txt	32	f	student	32	14.5	non-native	Spanish	Romance	IndoEuropean	6	3132	36	25	British	immersion	54	2103.34	62	4523.704918	76	5241.833333
20501460-5eef-4b8a-860c-97f5c32e6b8f.txt	48	f	education	23	17	native	English	English	IndoEuropean	0	NA	NA	NA	British	native	75	579.6769231	76	2215.8	78	4899.5
243a99aa-212e-463a-aabc-2ecf2f049444.txt	26	m	other	11	14.5	non-native	Norwegian	NorthGermanic	IndoEuropean	5	1080	36	23	Various	immersion	67	549.8166667	71	2391.274194	73	4601.371429
2595f790-0c48-4c99-873e-f048ead2b1fe.txt	65	f	education	24	17	native	English	English	IndoEuropean	0	NA	NA	NA	British	native	72	342.140625	68	2041.954545	73	6300.838235
268d16f7-e74e-4287-a6e9-c3cb3d1bf10d.txt	31	f	high	31	12	native	English	English	IndoEuropean	0	NA	372	0	British	native	75	454.7794118	78	1983.302632	78	4548.675325
27f76b5b-9e67-49d3-95fa-8e4d1288dbe5.txt	42	f	unemployed	16	15.5	native	English	English	IndoEuropean	0	NA	504	0	British	native	74	446.516129	77	2458.418919	71	6211.705882
28836aee-1cc0-4561-aa20-9dd5a7d36a3d.txt	35	f	other	10	12	non-native	Slovak	Slavic	IndoEuropean	8	1980	144	23	British	immersion	60	1253.137931	64	4480.063492	80	8854.202703
2929c2f7-97d1-4e2b-852d-1434325cc275.txt	35	m	other	36	17	non-native	Spanish	Romance	IndoEuropean	4	NA	168	21	Other	immersion	72	666.0285714	78	2794.338028	80	6225.535211
2afef8ae-d3de-4d4c-b149-00414d73a4b4.txt	63	f	retired	12	15	non-native	Portuguese	Romance	IndoEuropean	17	432	0	NA	American	classroom	66	804.8392857	75	2353.534247	77	7072.648649
2b59f5fc-21c8-4909-987d-d7e749629ca3.txt	33	f	other	42	15	native	English	English	IndoEuropean	0	NA	NA	NA	American	native	71	682.6923077	75	2081.774648	80	5120.936709
2bbf7556-2225-4f97-8fad-9cc3464b6cca.txt	58	m	high	6	20	non-native	Spanish	Romance	IndoEuropean	6	3456	98	20	Various	immersion	69	679.5438596	75	2432.323944	77	4509.986486
3015f65e-e0fa-49f5-82eb-9f9913285c1d.txt	44	f	english	3	15	non-native	Serbian	Slavic	IndoEuropean	9	720	60	19	British	immersion	73	596.0923077	78	3714.849315	79	7328.432432
305aba5a-a9fe-4683-ac98-817f55b046ca.txt	32	f	high	31	12	non-native	Italian	Romance	IndoEuropean	16	NA	96	24	British	immersion	71	1194.235294	77	2930.118421	73	5248.070423
3583528e-e87c-42ad-9ba8-eb7820f8b78e.txt	29	f	other	37	17	native	English	English	IndoEuropean	0	NA	348	0	British	native	75	549.3943662	77	2827.894737	76	5070.885714
35aa12b9-ea16-4754-81be-958507c3dbce.txt	33	f	high	36	20	non-native	Spanish	Romance	IndoEuropean	12	5400	0	NA	American	classroom	60	1344.145455	74	3674.824324	78	5979.028169
39da8017-8a42-4432-87cb-9d7ef6750e66.txt	41	f	education	13	15	non-native	Spanish	Romance	IndoEuropean	10	648	84	23	Various	immersion	64	1049.016393	69	4034.925373	80	6144.216216
3e559eeb-c201-4ca1-b8d4-6246eafc7a66.txt	30	f	other	35	17	non-native	Italian	Romance	IndoEuropean	7	1104	0	NA	British	classroom	62	688.1607143	65	2660.03125	78	5458.657534
42c58654-3b70-4954-a574-1e553d9989c0.txt	45	f	high	2	17	native	English	English	IndoEuropean	0	NA	NA	NA	British	native	77	937.7857143	78	2000.068493	80	4836.417722
44a5e7dc-25b5-41c3-bbdd-8a01e4e5639a.txt	50	m	education	30	20	non-native	German	WestGermanic	IndoEuropean	9	1368	0	NA	British	classroom	69	826.7192982	71	2751.439394	75	5046.882353
44c0c99f-f4d6-4a9d-8e58-66255aa0c21a.txt	57	f	retired	38	17	native	English	English	IndoEuropean	0	NA	NA	NA	Other	native	78	792.6231884	75	2366.542857	80	7480.428571
4b215874-0aa2-4498-bd6f-eb5ee184129e.txt	52	m	education	8	17	native	English	English	IndoEuropean	0	NA	NA	NA	British	native	76	648.2539683	71	2381.072464	76	5180.671642
4cd82d93-d8c1-4029-87ae-3141dab3dcac.txt	34	m	education	42	15	non-native	French	Romance	IndoEuropean	12	3420	216	18	British	immersion	65	888.6	68	2727.560606	80	5950.697368
50684a27-7114-44ad-8cb0-f30a9f35f4f6.txt	49	f	other	1	15	native	English	English	IndoEuropean	0	NA	NA	NA	British	native	76	383.7222222	74	1740.932432	80	3785.923077
56d94e2a-2a65-41f2-b2c6-88f512183c6d.txt	43	m	english	18	17	non-native	Polish	Slavic	IndoEuropean	13	9288	0	NA	British	classroom	73	928.6338028	78	3110.391892	75	6405
5810829a-5787-41b5-ae2f-22e5c1173e96.txt	26	f	student	9	18	non-native	Estonian	FinnoUgric	non-IndoEuropean	10	1512	0	NA	American	classroom	69	573.3709677	74	3228.619718	80	6284.934211
5ba6abbd-1c4f-467f-98aa-9e474782242f.txt	49	f	high	1	15	non-native	Spanish	Romance	IndoEuropean	11	3600	2	24	British	classroom	55	1196.12963	70	3906.367647	78	8661.779221
5ece6307-f963-4157-aa34-5df930d0f0de.txt	55	f	education	8	14.5	non-native	French	Romance	IndoEuropean	13	1152	0	NA	Various	classroom	58	1170.872727	60	3882.637931	78	7026.666667
5f742a56-0b0f-46d7-87e9-99fc9512542f.txt	62	f	retired	22	17	native	English	English	IndoEuropean	0	NA	NA	NA	Other	native	77	411.4109589	79	1700.662338	80	4109.818182
60ebe171-0a08-4081-ab7e-0d67d821c8bd.txt	65	f	retired	28	15	native	English	English	IndoEuropean	0	NA	NA	NA	Other	native	77	389.3333333	76	2078.826667	76	5565.647059
644d5a3e-ee51-42b0-8be5-721a6ba6e68e.txt	34	m	other	36	17	native	English	English	IndoEuropean	0	NA	NA	NA	British	native	71	707.4603175	74	2930.208955	76	7719.163934
680a261d-1c69-42f1-a7b4-8d52bcae0ebf.txt	48	m	education	30	20	non-native	German	WestGermanic	IndoEuropean	10	1188	36	35	British	immersion	72	606.3970588	72	2260.985915	74	5794.652778
68e01c17-c2b6-4e05-b40d-8019d3b50706.txt	36	m	english	29	17	native	English	English	IndoEuropean	0	NA	NA	NA	American	native	78	486.7352941	76	2446.611111	74	6406.432432
692c4bb2-f870-465a-9e3f-1d03a55146b5.txt	48	f	high	43	15	non-native	Greek	Greek	IndoEuropean	10	900	60	25	Various	immersion	76	296.6349206	75	2116.722222	80	4501.32
69f11314-6f1e-4c15-8522-52562876f9b7.txt	59	f	education	25	17	non-native	Portuguese	Romance	IndoEuropean	11	3168	3	NA	American	classroom	64	1199.327869	73	3016.391304	78	6183.263889
6dfa61ae-447e-4e21-9f0b-ca3d95148069.txt	46	m	high	26	17	non-native	Polish	Slavic	IndoEuropean	15	396	180	31	Other	immersion	58	1031.351852	66	4639.578125	79	4716.72973
74d683bf-a70f-4a02-8ace-47f9586cf14c.txt	56	f	language	25	15	non-native	French	Romance	IndoEuropean	11	1008	60	36	Other	immersion	62	862.2181818	67	3679.4	73	6972.057971
75d9a89a-20a1-46fa-877f-e5a73c914a1e.txt	57	f	retired	19	12	native	English	English	IndoEuropean	0	NA	684	0	British	native	75	405.9242424	77	1898	79	5486.589041
766b2b4d-b71a-4729-b34b-1ec05167b98b.txt	41	f	english	43	15	non-native	Greek	Greek	IndoEuropean	9	NA	4	21	British	classroom	68	316.8947368	75	2463.056338	79	6306.723684
76fc2d3e-d889-4a17-8826-b277b4b00cb1.txt	42	f	high	5	15.5	native	English	English	IndoEuropean	0	NA	NA	NA	British	native	77	260.8166667	74	1861.830986	77	6093.485294
77f426c5-e802-4879-bfa9-a7ed3b422d8d.txt	32	f	education	21	17	non-native	Arabic	Arabic	non-IndoEuropean	12	4140	36	29	American	immersion	61	1334.813559	71	4182.929577	75	6696.957746
79fd331a-557f-43ac-a2b1-ccdd06927ec1.txt	31	f	high	35	17	native	English	English	IndoEuropean	0	NA	NA	NA	British	native	75	532.8484848	74	2041.084507	80	4090.923077
7a7d3516-68d2-41f8-8b62-866f6541fb72.txt	38	f	high	2	17	non-native	Romanian	Romance	IndoEuropean	10	2160	0	NA	British	classroom	54	894.1153846	59	3381.396552	74	5845.619718
7c4382fe-fbd7-41b4-b8a9-0ef527fc5042.txt	29	f	high	37	17	non-native	Hungarian	FinnoUgric	non-IndoEuropean	25	NA	42	25.5	Various	immersion	58	1608.181818	68	3443.5	77	4871.916667
7ccb1c63-8e78-4016-9ae2-05f8c24aa69e.txt	33	m	high	4	14	non-native	Slovak	Slavic	IndoEuropean	9	1080	156	20	British	immersion	58	836.8571429	72	3486.5	72	5422.432836
7d2d1d8b-9c96-4b64-8acb-5e3ccef39e28.txt	30	m	student	11	14	non-native	Norwegian	NorthGermanic	IndoEuropean	7	NA	0	NA	American	classroom	72	685.4067797	75	2180.536232	75	3820
7d50abb7-6668-4429-9e80-5700bb3e89a9.txt	57	f	education	6	20	native	English	English	IndoEuropean	0	NA	684	0	Other	native	73	659.6119403	66	2753.59375	77	6466.746667
80690402-ce4d-4f63-8366-9ebc69e2945d.txt	42	f	student	16	14.5	non-native	German	WestGermanic	IndoEuropean	12	3420	192	26	Other	immersion	71	610.9850746	75	2020.528571	74	6442.205882
83ec2bbd-c57d-456c-b189-be68e97cc6b4.txt	39	f	english	40	17	non-native	Croatian	Slavic	IndoEuropean	7	3744	0	NA	British	classroom	73	424.1617647	80	1788.533333	80	5476.753247
8678912c-448d-4c6b-b7fa-7d5f4b84baf7.txt	44	f	education	2	17	non-native	French	Romance	IndoEuropean	12	NA	432	18	Various	immersion	69	439.4920635	74	2404.388889	80	5168.424658
8780e78e-4551-4fe3-93ef-0736b9ab5b20.txt	40	f	english	3	15	non-native	Serbian	Slavic	IndoEuropean	10	1260	0	NA	British	classroom	79	391.375	80	1866.025316	79	4530.584416
893b691e-aaaa-4061-9c68-a9788ac646af.txt	32	m	student	21	17	native	English	English	IndoEuropean	0	NA	NA	NA	American	native	74	620.2647059	80	2387.467532	79	6265.276316
8a40c968-4f3f-45b9-85d3-232a12fbfd8c.txt	56	f	education	33	20	non-native	Portuguese	Romance	IndoEuropean	10	1440	6	55	American	classroom	73	1041.057971	79	3441.173333	80	7338.506494
8cad2649-651b-41e0-b010-c8deec38958a.txt	56	f	medicine	19	12	non-native	German	WestGermanic	IndoEuropean	12	1044	0	NA	British	classroom	57	1149.163636	63	3236.612903	71	7086.783333
8ce13efa-9e9d-4e07-a074-edc0a2c2199a.txt	54	f	education	44	15	native	English	English	IndoEuropean	0	NA	NA	NA	British	native	79	397.8630137	78	1402.736111	78	5239.013333
8e7a8a28-14f5-44af-9bf8-c771e3342c97.txt	33	m	education	4	15	native	English	English	IndoEuropean	0	NA	NA	NA	British	native	74	510.4090909	75	1519.2	77	3414.352941
8f62b4f4-a40e-48a7-8ebe-49638cbf122b.txt	57	f	medicine	38	17	non-native	French	Romance	IndoEuropean	38	NA	204	40	American	immersion	62	736.5090909	60	3998.827586	75	7884.869565
90c27523-a1f4-4008-8a28-be8e71a947e7.txt	38	m	other	29	15	non-native	Thai	Thai	non-IndoEuropean	12	432	60	35	British	immersion	38	3004.342105	53	3733.557692	75	8892.458333
914716c3-80b2-4209-9e0f-8eaa22012143.txt	44	m	other	3	15	native	English	English	IndoEuropean	0	NA	NA	NA	Other	native	75	886.8656716	76	4411.486486	79	16526.9403
9186ea2b-ce13-438a-9b04-6c677b9b9d78.txt	53	f	unemployed	33	20	non-native	Spanish	Romance	IndoEuropean	15	3312	216	25	American	immersion	69	496.1363636	79	2262.723684	70	5111.411765
99582a83-aebf-4963-bc26-6639b43bb12f.txt	32	f	education	42	15	non-native	Portuguese	Romance	IndoEuropean	14	3096	1	31	American	classroom	47	1927.422222	58	4807.122807	78	8091.328767
99bdc20f-33be-4da3-be76-c65c2268605e.txt	49	m	education	17	12	non-native	German	WestGermanic	IndoEuropean	10	648	60	44	British	immersion	70	416.6666667	75	2946.898551	80	4409.545455
9b5ddc8b-68e3-4fb8-9873-ec59c0e8f87b.txt	41	f	high	5	15	non-native	German	WestGermanic	IndoEuropean	6	432	144	20	American	immersion	71	769.9206349	72	2571.779412	70	4848.890625
9d337df7-6a69-4470-9c93-e5c7cd245f7a.txt	29	f	high	10	12	native	English	English	IndoEuropean	0	NA	NA	NA	Other	native	75	474.5072464	79	1769.467532	80	4286.552632
9fd265a5-ed1d-455a-98ec-2c8b9ff075e8.txt	38	f	other	37	15	non-native	Hungarian	FinnoUgric	non-IndoEuropean	7	864	0	NA	British	classroom	77	288.515625	75	2070.027778	80	4601.702703
a02749bd-a80d-4132-a06c-62048f060f6e.txt	51	f	language	27	17	non-native	Sinhalese	IndoAryan	IndoEuropean	9	NA	216	33	British	immersion	56	1316.54717	59	4595.827586	77	9851.2
a123fa8f-d34e-4d1f-8aff-188cac873da7.txt	63	f	english	22	17	non-native	Portuguese	Romance	IndoEuropean	12	504	0	NA	American	classroom	59	897.2941176	73	3915.887324	78	7022.09589
a5815764-6c15-4b2d-883b-c35a6528579f.txt	47	f	other	43	15	native	English	English	IndoEuropean	0	NA	NA	NA	Various	native	75	1087.267606	78	4103.896104	80	6650.652778
a5a32c01-3bc2-44ba-841d-f270b9e5f8d1.txt	45	m	education	39	17	non-native	French	Romance	IndoEuropean	7	1368	180	31	British	immersion	65	818.5333333	76	2596.917808	73	5254.523077
a5ef6150-046d-4f6f-89a5-fd7c0caa0004.txt	51	f	language	27	17	native	English	English	IndoEuropean	0	NA	NA	NA	British	native	76	458.880597	77	1884.763158	79	7701.905405
a60df9e1-ec53-4051-acd1-45b87c4fd2f1.txt	65	f	retired	24	17	non-native	German	WestGermanic	IndoEuropean	16	540	264	43	British	immersion	63	641.4385965	78	2071.415584	78	7252.739726
aafca183-4720-49f0-bfcb-fc14a1a97cc4.txt	46	f	education	39	17	native	English	English	IndoEuropean	0	NA	NA	NA	British	native	80	283.4857143	79	1287.56	77	3559.140845
ab79668d-89cb-4ebf-a91d-229a0a93e80d.txt	64	f	medicine	12	15	native	English	English	IndoEuropean	0	NA	NA	NA	Other	native	77	752.0571429	75	2244.520548	76	4616.585714
ac22c669-f3bf-4575-8603-50d0245dae5d.txt	29	m	education	41	16	non-native	Spanish	Romance	IndoEuropean	12	1404	0	NA	British	classroom	64	933.483871	74	2518.4	76	6408.424658
ae09bde6-1d20-4334-9084-08eb2d6115ea.txt	46	f	language	15	17	native	English	English	IndoEuropean	0	NA	NA	NA	British	native	78	418.2686567	78	1608.260274	77	4787.452055
b102521a-e55c-4dab-bfcd-93c6339c164a.txt	46	f	education	26	17	native	English	English	IndoEuropean	0	NA	NA	NA	British	native	74	351.8939394	77	1619.697368	76	3996.917808
b4becd13-e0a2-40dc-94dd-6b0c993fddd3.txt	56	f	high	7	17	non-native	Romanian	Romance	IndoEuropean	10	792	0	NA	British	classroom	61	674.1929825	64	2694.375	79	5088.305556
b5d62d5e-319e-4b83-897c-f545de92dc7b.txt	54	f	education	44	15	non-native	Greek	Greek	IndoEuropean	8	2340	40	23	British	immersion	74	988.4492754	76	3152.276316	76	5232.271429
b6e07e13-8235-4544-9340-e57fed954222.txt	56	f	education	7	17	non-native	French	Romance	IndoEuropean	12	NA	36	21	British	immersion	74	465.3333333	74	1974.042857	78	5883.851351
b86c0099-c71e-49df-b05a-ceb6801da913.txt	41	f	education	18	17	non-native	Polish	Slavic	IndoEuropean	16	432	180	26	British	immersion	62	793.1886792	72	4034.986111	79	8049.16
b8942eee-e223-4527-97dc-ff8a6b472195.txt	43	f	english	13	16	non-native	Portuguese	Romance	IndoEuropean	12	111	0	NA	American	classroom	61	420.8679245	72	2439.223881	79	6182.30137
bad48ff4-b36a-4e2a-a6cb-38d21333df56.txt	50	f	education	39	15	non-native	Spanish	Romance	IndoEuropean	12	864	0	NA	British	classroom	48	1853.304348	66	4630.920635	78	11532.24286
c017779a-7f16-483f-80ff-2ead03723849.txt	21	f	student	16	13	non-native	German	WestGermanic	IndoEuropean	8	1376	0	NA	British	classroom	71	415.984127	74	1858.442857	79	4409.810811
c38b5028-1169-45c0-bb40-15e22ca0b6aa.txt	29	f	language	29	15	non-native	Thai	Thai	non-IndoEuropean	5	6804	0	NA	American	classroom	55	1162.294118	72	3335.441176	75	7270.65625
c56f8d65-e9ce-47dc-a642-71d554316482.txt	36	f	english	20	15	non-native	Spanish	Romance	IndoEuropean	4	5292	6	19	Various	classroom	61	596.2040816	72	3261.820896	80	6181.68
c5bad743-3204-4eb9-be44-06a0c15e1c22.txt	64	f	education	34	17	native	English	English	IndoEuropean	0	NA	NA	NA	British	native	78	1263.666667	77	2849.040541	78	8005.166667
ca15c71b-a210-4d35-b9a0-0ecd9ae8180f.txt	52	f	other	5	17	non-native	German	WestGermanic	IndoEuropean	10	NA	0	NA	British	classroom	77	422.7692308	76	1711.628571	80	4733.101266
cbb5373c-e7f0-463e-a8ba-53cb3bd3b4cc.txt	49	m	medicine	1	15	non-native	Greek	Greek	IndoEuropean	8	NA	52	45	British	immersion	57	1354.692308	68	3525.432836	80	9355.140845
d2e2a374-b1f4-4513-aa24-e12718e4645b.txt	40	f	english	23	17	non-native	Portuguese	Romance	IndoEuropean	10	864	1	NA	Various	classroom	60	568.7115385	69	2217.28125	74	5508.57971
d351aa8d-a0f2-4c02-a551-1d30f74a191a.txt	63	m	education	6	19	non-native	Italian	Romance	IndoEuropean	55	2190	0	NA	British	classroom	53	979.8823529	56	3168.788462	76	5580.972603
d46d79e7-a9b1-4b6d-8b3d-531940db701c.txt	41	f	education	18	18	native	English	English	IndoEuropean	0	NA	NA	NA	British	native	77	343.2428571	76	1791.933333	77	4274.197183
d5be5ef0-8af3-4394-b66a-2e69a510f347.txt	56	f	education	7	17	native	English	English	IndoEuropean	0	NA	NA	NA	British	native	76	536.9315068	78	1875.884615	79	4658.662162
d5ec730a-2939-40f4-afe2-0f3ed0a5072d.txt	55	f	high	19	13	non-native	German	WestGermanic	IndoEuropean	10	1080	324	28	British	immersion	76	550.6176471	76	2183.625	75	5387.478261
d708ee19-ef91-4c30-a71b-4d00f64540e6.txt	53	f	education	34	17	non-native	Polish	Slavic	IndoEuropean	15	6660	0	NA	British	classroom	70	853.4333333	72	2980.26087	79	8197.918919
da8b9080-6755-4b71-9261-5c4c968bd7bc.txt	29	m	high	41	15.5	non-native	Italian	Romance	IndoEuropean	8	864	55	24	British	immersion	67	1795.171875	78	2769.416667	78	8607.486842
db4afcc0-99f7-4dd3-b53c-bea185da6a20.txt	27	f	student	9	17	native	English	English	IndoEuropean	0	NA	NA	NA	American	native	75	344.8461538	79	2075.780822	78	6252.052632
db93f4f4-0956-4c70-a1be-1abb5359166d.txt	26	f	other	11	15	native	English	English	IndoEuropean	0	NA	312	0	British	native	75	249.6164384	77	1730.266667	80	4567.233766
dcd68459-1d58-4e35-88fe-f7e3f77d06ec.txt	38	m	education	14	16	non-native	Portuguese	Romance	IndoEuropean	25	NA	72	25	American	immersion	54	1174.020833	69	4240.338235	71	9293.42029
e03fa3d1-e8da-440e-95b8-51dbd9ebe64d.txt	46	m	high	28	15	non-native	German	WestGermanic	IndoEuropean	10	972	0	NA	Other	classroom	75	977.1230769	70	3288.214286	80	8659.013514
e239c6d0-0ac9-4cb4-8d56-5176ddddfc4b.txt	61	m	education	24	15	non-native	Dutch	WestGermanic	IndoEuropean	15	288	0	NA	American	classroom	63	759.5454545	71	3508.142857	78	6702.626667
e37a7d26-77d7-4490-a34a-fa95c027a920.txt	62	f	retired	22	17	non-native	Portuguese	Romance	IndoEuropean	14	720	36	30	Various	immersion	72	707.8333333	74	2394.7	75	6662.794118
e44eb47d-4ae0-40b1-bfb9-2da5e52e5a14.txt	48	f	language	23	17	non-native	Spanish	Romance	IndoEuropean	4	NA	216	30	Various	immersion	55	716.1372549	71	3268.768116	68	6330.629032
e5b9b840-b837-4b94-98f8-5c4e88c9f476.txt	37	f	education	26	17	non-native	Polish	Slavic	IndoEuropean	13	1728	0	NA	British	classroom	68	652.5	76	2993.868421	80	5084.363636
e784ba12-1618-48b1-a21e-a5341aa94992.txt	55	m	english	25	15	native	English	English	IndoEuropean	0	NA	NA	NA	British	native	73	496.030303	75	1915.130435	79	5576.96
e82e5d52-452b-4ee9-bd7c-a41fff0d1993.txt	48	m	high	45	18	non-native	Punjabi	IndoAryan	IndoEuropean	12	1296	0	NA	British	classroom	63	595.9672131	63	2550.306452	80	10302.14286
e85e9571-18a8-401f-a30d-a58b80afc272.txt	53	f	education	17	13	non-native	Dutch	WestGermanic	IndoEuropean	12	864	0	NA	American	classroom	70	623.1875	72	1754.069444	79	3950.56
e945e43a-2f09-4244-9f69-1a28718caf4a.txt	46	f	education	15	16.5	non-native	Spanish	Romance	IndoEuropean	7	2475	186	25	British	immersion	55	1283.509804	70	4026.014493	78	9224.76
eab9a09e-7127-4734-9e75-8b010af12e62.txt	21	f	student	4	15	non-native	Slovak	Slavic	IndoEuropean	7	2484	0	NA	British	classroom	60	552.4482759	67	2149.671642	77	4922.486111
ec75636a-b28b-4cc2-8392-479a6b18d5ab.txt	64	f	retired	12	15	non-native	French	Romance	IndoEuropean	11	1512	492	23	NA	immersion	74	490.2898551	71	2441.536232	79	6756.921053
ecce1790-c418-42d1-b0ad-6ba7b4f31e89.txt	28	f	high	41	15.5	native	English	English	IndoEuropean	0	NA	NA	NA	British	native	77	360.3466667	77	2826.868421	80	6332.512821
ecef70d6-8e49-414a-a63a-b6dfb5743772.txt	39	f	education	20	14	non-native	Spanish	Romance	IndoEuropean	29	NA	120	29	Various	immersion	56	670.88	73	3735.222222	69	6019.307692
ef7c596e-b796-4c33-8136-8994071ca200.txt	61	f	retired	45	15	non-native	Punjabi	IndoAryan	IndoEuropean	5	9828	528	17	British	immersion	76	596.1388889	76	2827.434211	78	7497.371429
f1269cb9-1624-4077-a9a8-62f81018cb53.txt	41	m	education	13	15	native	English	English	IndoEuropean	0	NA	NA	NA	British	native	78	704.5652174	77	2751.402597	79	6678.194444
f1eb69e0-537d-45ad-87b5-03f4b62cfc27.txt	33	f	education	21	17	non-native	Arabic	Arabic	non-IndoEuropean	12	2160	0	NA	Other	classroom	51	1340.653061	67	4804.328358	78	7652.584416
f44e42e2-7bd5-48e3-bf32-89809db2b14f.txt	48	f	education	27	17	non-native	Estonian	FinnoUgric	non-IndoEuropean	8	4140	0	NA	British	classroom	64	714.8103448	66	3124.819672	77	4919.166667
f49138f3-b898-44a0-a340-e82acc112a6f.txt	31	f	english	32	15	non-native	Spanish	Romance	IndoEuropean	6	3528	0	NA	Various	classroom	73	634.1	75	2362.915493	75	4643.305556
f746827f-8c5b-4e67-8e49-d5af5ea6481d.txt	32	f	english	32	15	native	English	English	IndoEuropean	0	NA	NA	NA	British	native	76	751.9861111	76	1268.828571	80	3778.896104
f83aa389-a243-429f-9aaf-c8b006673171.txt	53	f	english	33	20	native	English	English	IndoEuropean	0	NA	636	0	British	native	72	459.2816901	79	1843.576923	69	5401.881356
f89df988-06b7-4223-95e9-8c843ce4021a.txt	47	m	other	17	12	native	English	English	IndoEuropean	0	NA	NA	NA	British	native	77	451.1666667	79	2071.371795	79	5364.133333
fdc635be-dffd-4d7a-9fb9-97bcf17b640b.txt	52	f	education	8	17	non-native	French	Romance	IndoEuropean	11	2160	360	22	British	immersion	71	786.4461538	78	2441.458333	72	8053.190476
fef7ca9b-4e79-49f5-b2a9-06e461809faa.txt	40	f	other	40	17	non-native	Polish	Slavic	IndoEuropean	25	162	144	28	British	immersion	63	538.3050847	67	2318.09375	78	6082.055556
